# Supplementary material for: Nonalcoholic fatty liver disease, a potential risk factor of non-specific ST-T segment changes: data from a cross-sectional study
Source: PeerJ. 2020 May 13;8:e9090. doi: 10.7717/peerj.9090 (PMC7229768; doi:10.7717/peerj.9090)
Supplement: Data S1 [file peerj-08-9090-s001.xls]

## Sheet: after screening
ID	sex	age	NAFLD	NAFLD severity	height	weight	BMI	BMI	HBP	high TG	Low HDL	hige FBG	SBP	DBP	heart rate	FBG	TG	TC	High TC	HDL-C	LDL-C	AST	ALT	ALP	GGT	NST changes	normal ECG
51709	1	44	0	0	178	74	23.36	2	0	0	0	0	107	62	75	4.6	0.93	4.54	0	1.14	3.05	18	38	72	21	0	1
51711	1	38	1	1	171.5	85.9	29.21	3	0	1	1	0	108	70	88	4.4	2.41	4.64	0	0.89	2.7	11	30	55	21	0	1
51720	1	38	0	0	169.5	76.1	26.49	3	0	0	1	0	109	72	66	5.4	1.55	2.87	0	0.77	1.48	29	47	76	31	0	1
51743	0	38	0	0	165.5	63.2	23.07	2	0	0	0	0	106	74	68	3.6	0.88	5.47	0	1.57	3.2	14	11	48	9	0	1
51716	1	48	1	1	172	72	24.34	2	1	0	1	1	144	87	71	12.6	1.13	4.56	0	0.99	2.9	12	9	67	21	0	1
51747	0	38	0	0	166.5	67.2	24.24	2	0	0	1	0	100	70	69	4.9	0.86	4.13	0	1.28	2.09	10	6	54	12	0	1
38404	1	54	1	1	183.5	84.8	25.18	3	1	1	0	1	153	97	58	5.6	2.2	6.09	1	1.6	3.3	31	31	75	32	0	1
51721	1	36	1	2	165	75	27.55	3	0	0	0	0	119	76	109	4.3	1.66	4.37	0	1.12	2.13	31	40	92	58	0	1
51755	0	34	0	0	165	65.5	24.06	2	0	0	0	0	110	70	79	4.9	1.17	4.69	0	1.4	2.3	28	34	70	19	0	1
38403	0	49	1	1	157	55.6	22.56	2	0	1	0	0	110	80	76	4.8	3.96	5.96	0	1.32	3.68	21	28	101	43	0	1
46644	1	63	1	1	169	70	24.51	2	1	1	1	0	134	88	95	4.8	2.27	4.1	0	0.87	1.94	19	28	82	27	0	1
49533	1	53	1	1	171.5	78.6	26.72	3	0	0	0	1	127	84	76	8.2	1.5	6.02	1	1.24	4.19	40	74	74	37	0	1
51741	0	42	0	0	154	48.1	20.28	2	0	0	0	0	100	70	77	4.1	0.6	5.11	0	1.71	2.8	17	15	61	13	0	1
52481	0	55	1	1	158.5	81.3	32.36	4	1	0	1	0	150	100	76	5.2	1.11	5.36	0	1.28	3.95	25	24	41	22	0	1
52981	0	42	0	0	159.5	63.2	24.84	2	0	0	0	0	110	80	72	4.8	0.61	4.78	0	1.75	2.43	24	19	35	16	0	1
36536	1	40	0	0	171.5	72.4	24.62	2	1	1	1	0	125	86	100	4.6	4.38	3.37	0	1.02	1.09	47	74	108	24	0	1
39001	1	49	1	1	171.5	76.3	25.94	3	1	1	0	0	138	94	80	4.2	3.83	5.67	0	1.05	3.26	24	42	73	52	0	1
49536	1	42	0	0	182.5	76.2	22.88	2	0	0	0	0	120	84	93	5.4	1.33	6.16	1	1.62	3.93	16	18	43	27	0	1
51701	1	54	1	1	174.5	77.8	25.55	3	1	0	0	1	149	100	72	8.3	1.31	5.2	0	1.1	3.07	19	34	98	33	0	1
51712	1	31	1	2	172.5	80.5	27.05	3	0	0	0	0	127	80	89	4.6	1.35	3.63	0	1.22	2.02	34	64	78	27	0	1
38977	1	44	0	0	172.5	68.4	22.99	2	1	1	0	1	132	79	79	5.8	2.91	5.64	0	1.74	3.57	36	31	62	64	0	1
49580	0	59	1	1	157	63.4	25.72	3	1	1	0	1	150	90	69	6.6	2.42	6.79	1	1.59	4.29	20	29	94	19	0	1
51745	0	39	0	0	156	55.7	22.89	2	0	0	0	0	100	70	64	4.3	0.51	4.81	0	2.01	2.26	20	13	56	11	0	1
51752	0	39	0	0	164.5	64.3	23.76	2	0	0	0	0	106	70	81	5.3	0.94	4.12	0	1.5	2.12	24	33	88	20	0	1
51754	0	53	0	0	157	55.2	22.39	2	0	1	0	0	120	80	72	5.4	1.73	7.79	1	1.55	5.12	16	8	43	11	0	1
14970	0	52	0	0	156.5	51.2	20.9	2	0	0	0	0	90	60	83	4.8	1.55	6.19	1	2.63	2.37	86	88	204	172	0	1
49562	1	36	0	0	173.5	81.2	26.97	3	1	1	1	0	136	79	62	5	1.77	4.92	0	0.93	2.85	21	38	92	25	0	1
51759	0	40	0	0	156	57.8	23.75	2	0	0	0	0	100	70	70	5	0.86	4.24	0	1.56	2.22	20	16	72	17	0	1
52366	0	45	1	1	169	67.4	23.6	2	0	0	1	0	100	70	66	5.1	0.86	4.36	0	1.29	2.52	18	27	69	19	0	1
52398	1	32	1	1	170.5	78.3	26.93	3	0	1	0	0	126	83	76	4.8	2.38	4.68	0	1.14	2.73	18	35	69	26	0	1
52416	1	32	0	0	169.5	52.8	18.38	1	0	0	0	0	109	73	67	4.4	0.85	4.15	0	1.14	2.3	19	14	75	22	0	1
49581	0	41	0	0	167	66.4	23.81	2	0	1	1	0	120	80	65	4.8	2.54	4.57	0	1.12	2.48	17	26	62	13	0	1
51728	1	35	1	1	169	71.2	24.93	2	0	0	0	0	111	66	64	4.8	1.17	5.04	0	1.22	3.17	32	45	81	40	0	1
51760	0	47	0	0	159.5	61.3	24.1	2	0	0	0	0	120	80	67	5	1.3	4.84	0	1.7	2.17	15	9	35	15	0	1
51767	0	36	0	0	163	70.5	26.53	3	0	0	0	0	100	70	58	4.6	0.96	3.86	0	1.44	1.91	28	31	45	18	0	1
51714	1	57	0	0	169	72	25.21	3	1	0	0	0	133	80	66	4.6	1.15	6.14	1	1.33	4.03	24	31	84	77	0	1
51732	0	37	1	1	162.5	70.5	26.7	3	0	1	0	0	120	80	76	5.2	2.19	5.63	0	1.39	3.22	23	34	58	14	0	1
31383	0	44	0	0	157.5	54.8	22.09	2	0	0	1	0	116	78	82	4.5	0.97	4.14	0	1.2	2.06	29	37	48	9	0	1
50384	0	31	0	0	153.5	53.4	22.66	2	0	0	0	1	100	70	79	5.7	1.11	4.28	0	1.49	2.34	15	12	69	20	0	1
51707	1	35	0	0	170	74.4	25.74	3	0	0	0	0	117	70	73	4.9	0.94	5.07	0	1.53	2.8	16	21	43	14	0	1
51724	1	40	1	1	178	72.4	22.85	2	1	0	0	1	127	85	79	5.6	0.7	3.49	0	1.44	1.59	16	23	54	20	0	1
51739	0	36	0	0	168.5	63.4	22.33	2	0	0	0	0	100	70	64	4.6	0.44	3.31	0	2.18	0.71	20	13	31	13	0	1
52391	1	29	0	0	171	71	24.28	2	1	1	0	0	136	105	105	5.5	2.18	5.89	0	1.65	3.69	27	42	62	42	0	1
54051	0	43	0	0	159	62.6	24.76	2	0	0	0	1	110	76	85	5.8	0.69	4.64	0	2.02	2.22	19	15	59	9	0	1
55528	1	31	1	1	177.5	90.4	28.69	3	0	1	0	1	119	79	80	5.8	2.85	3.96	0	1.36	1.98	19	30	95	35	0	1
56734	0	27	0	0	172	63.3	21.4	2	0	0	0	0	100	70	73	4.5	0.59	3.87	0	1.76	1.92	8	11	48	9	0	1
56759	0	23	0	0	162.5	63.8	24.16	2	0	0	0	0	100	70	70	5.1	0.95	4.76	0	1.83	2.81	19	10	61	8	0	1
52370	1	43	0	0	171	73.3	25.07	3	0	0	0	0	106	67	70	5.4	1.06	4.39	0	1.41	2.57	28	45	72	32	0	1
52406	0	59	0	0	162	68	25.91	3	1	0	0	0	140	90	56	5	1.68	6.1	1	1.65	3.79	19	15	59	17	0	1
54355	1	38	0	0	166.5	62.8	22.65	2	0	0	0	1	111	77	62	5.6	1.3	4.69	0	1.33	2.53	15	18	48	17	0	1
56695	1	43	0	0	166.5	59.8	21.57	2	0	1	0	0	102	60	80	5.1	1.92	5.13	0	1.99	2.94	20	25	63	19	0	1
56710	1	29	0	0	179	77.2	24.09	2	1	0	0	0	151	92	95	5.2	1.13	4.81	0	1.5	3.08	16	15	54	21	0	1
52433	1	32	0	0	158	60.8	24.36	2	0	0	0	0	113	71	71	4.6	0.88	4.97	0	1.31	2.76	28	26	82	37	0	1
52483	1	28	0	0	178	66.7	21.05	2	0	0	0	0	120	78	95	4.7	0.65	4.29	0	1.43	2.11	16	10	56	14	0	1
53187	1	51	1	1	167	79.4	28.47	3	1	1	0	1	137	95	77	6.5	5.06	5.07	0	1.29	2.5	23	36	56	56	0	1
55624	0	39	0	0	161	58	22.38	2	1	0	0	0	140	94	76	4.5	0.87	4.78	0	1.88	2.39	14	9	57	14	0	1
56686	1	46	1	2	182.5	104.9	31.5	4	1	1	0	1	146	104	78	6	7.36	5.84	0	1.43	2.55	26	45	65	93	0	1
56688	1	45	0	0	174	73.8	24.38	2	0	1	0	0	124	73	66	5.2	1.78	4.7	0	1.66	2.78	27	46	73	123	0	1
56722	1	25	0	0	175	74.5	24.33	2	1	0	0	0	135	72	80	5.5	1.36	4.69	0	1.73	2.5	27	39	67	15	0	1
56769	0	48	0	0	162.5	55	20.83	2	0	0	0	0	110	80	78	5.3	0.88	4.29	0	1.59	2.35	19	13	49	16	0	1
52390	1	32	0	0	171.5	72	24.48	2	0	0	0	0	111	70	74	5	1.23	4.52	0	1.41	1.97	20	17	70	12	0	1
52458	1	35	1	1	166	74.7	27.11	3	1	0	0	0	122	86	87	4.8	1.17	4.88	0	1.5	2.83	28	47	51	25	0	1
52409	1	27	0	0	171	69	23.6	2	0	0	0	0	129	80	63	4.5	1.38	4.81	0	1.66	2.37	19	27	66	17	0	1
54364	1	52	0	0	164.5	65.4	24.17	2	0	0	0	1	117	74	70	5.6	1.12	5.81	0	1.62	3.28	18	26	142	15	0	1
56685	1	47	1	1	167.5	71.8	25.59	3	1	1	1	0	140	99	104	5.2	3.07	4.38	0	0.91	2.32	28	33	75	48	0	1
56770	0	45	0	0	162	50.3	19.17	2	0	0	0	0	120	80	60	4.8	0.78	4.2	0	2.09	1.79	22	16	45	11	0	1
56764	0	23	0	0	159	51.7	20.45	2	0	0	0	0	100	70	82	4.4	0.74	3.62	0	1.69	1.61	27	22	63	20	1	2
56789	0	29	0	0	156.5	46.8	19.11	2	0	1	0	0	110	80	75	4.7	1.9	4	0	2.03	1.65	21	11	58	19	0	1
56791	0	28	0	0	165.5	71	25.92	3	0	0	0	0	100	70	89	4.8	1.58	3.41	0	1.59	1.26	11	8	53	9	0	1
51475	1	58	1	1	169.5	75.8	26.38	3	0	0	0	1	115	62	80	5.8	0.99	5.77	0	1.3	3.55	29	43	78	37	1	2
56713	1	28	1	2	177	81.9	26.14	3	0	1	0	0	120	82	84	5.4	3.28	6.84	1	1.06	5.04	24	43	147	81	0	1
56746	0	24	0	0	167	74.2	26.61	3	0	0	0	0	110	80	77	5.1	1.37	4.82	0	1.77	2.78	17	13	65	19	0	1
56795	0	27	0	0	158.5	65.2	25.95	3	0	0	0	0	100	70	76	4.9	0.55	3.38	0	1.64	1.49	17	16	59	23	0	1
52972	1	34	0	0	168.5	74	26.06	3	0	0	0	0	128	74	78	5.1	1.41	4.64	0	1.33	2.36	23	38	118	24	0	1
54367	0	45	0	0	163.5	66.2	24.76	2	0	1	0	0	110	70	76	5.5	2.12	5.8	0	1.48	3.52	26	25	83	18	0	1
54846	0	29	0	0	161	65	25.08	3	0	0	0	0	120	80	76	4.2	1.24	4.43	0	1.47	2.25	13	12	47	11	0	1
55537	1	21	0	0	173.5	78	25.91	3	1	1	0	0	137	95	88	5.4	1.78	4.22	0	1.18	2.43	32	77	61	36	0	1
55612	1	44	1	1	179	82.6	25.78	3	0	1	0	1	125	83	75	5.9	2.5	5.11	0	1.87	2.49	24	23	63	43	0	1
52387	1	34	0	0	170	69	23.88	2	0	0	0	0	107	71	69	4.8	1.48	5.33	0	1.39	3.51	19	18	94	25	0	1
53430	1	43	0	0	171	72.2	24.69	2	0	1	0	0	116	65	67	4.3	1.8	6.16	1	1.93	4	24	26	53	26	0	1
54352	0	37	0	0	158	52.2	20.91	2	0	0	0	0	110	70	74	5	1.11	5.2	0	1.89	2.51	13	13	35	13	0	1
52479	1	32	0	0	160	49.8	19.45	2	0	0	0	0	98	74	115	5.2	0.95	5.34	0	2.2	2.66	21	17	56	19	0	1
52979	0	29	0	0	158	54.4	21.79	2	0	0	0	0	90	60	70	4.7	0.45	4.19	0	1.54	1.83	25	24	56	15	0	1
55623	0	32	0	0	165	56	20.57	2	0	0	0	0	100	70	72	4.7	0.59	5.79	0	1.71	3.38	15	16	39	11	0	1
56727	1	22	0	0	175.5	51.2	16.62	1	0	0	0	0	109	63	78	4.8	0.57	2.17	0	1.24	0.76	19	7	72	12	0	1
56728	0	31	0	0	156.5	52.3	21.35	2	0	0	0	0	100	70	76	4.7	0.61	3.85	0	1.9	1.76	22	16	63	12	0	1
56745	0	25	0	0	159	50.4	19.94	2	0	1	0	0	110	70	69	3.8	1.72	5.14	0	3.03	1.69	14	12	40	17	0	1
52418	1	27	0	0	171	65	22.23	2	0	0	0	0	119	66	70	4.7	0.84	4.82	0	1.66	2.29	23	15	43	13	0	1
52482	0	26	0	0	170.5	66	22.7	2	0	0	1	0	110	80	78	4.8	1.1	3.73	0	1.07	1.79	10	7	60	10	0	1
54357	1	35	1	1	173	104	34.75	4	1	0	0	0	136	86	79	5.4	1.64	4.92	0	1.26	2.79	19	39	69	39	0	1
54371	1	45	1	2	167.5	87.6	31.22	4	0	1	0	0	105	62	70	5.1	3.43	5.07	0	1.22	2.89	21	32	54	27	0	1
54372	1	32	1	1	184	100.2	29.6	3	1	0	0	0	145	94	84	4.7	1.45	4.57	0	1.12	2.5	16	19	63	36	0	1
41312	0	34	0	0	158.5	57.6	22.93	2	0	0	1	1	120	80	78	6	1.31	4.94	0	1.25	2.44	16	25	46	20	0	1
47828	0	51	0	0	162	70	26.67	3	1	0	0	0	136	86	64	4.8	0.9	5.6	0	1.6	3.16	35	40	72	84	0	1
50170	0	31	0	0	161	53	20.45	2	0	1	0	0	110	80	89	5.1	1.89	4.53	0	1.81	2.33	40	73	92	102	0	1
51706	1	38	0	0	174	68.2	22.53	2	0	1	0	0	102	78	79	4.9	1.79	5.26	0	1.27	2.82	21	31	76	25	0	1
56771	0	41	0	0	159	67	26.5	3	0	0	0	0	100	70	71	4.8	0.81	4.53	0	1.72	2.42	17	14	71	13	0	1
56937	0	44	1	1	154.5	63.2	26.48	3	0	1	1	0	110	80	72	5.4	2.1	2.97	0	0.98	1.46	25	25	63	18	0	1
57254	1	44	1	1	171	77	26.33	3	1	0	0	0	133	89	78	5.5	1.37	4.8	0	1.51	2.68	26	37	41	35	0	1
52371	1	41	0	0	174.5	82.2	26.99	3	1	1	0	0	118	86	81	5.1	3.73	3.2	0	1.14	1	17	27	68	38	0	1
52378	1	37	0	0	171	63	21.55	2	0	0	0	1	118	84	80	5.6	1.45	4.67	0	1.48	3.03	25	35	111	22	0	1
52421	1	26	0	0	171	78.5	26.85	3	0	0	0	0	115	64	80	4.9	1.14	5.47	0	1.64	3.65	24	47	80	33	0	1
52464	1	38	0	0	176.5	72.5	23.27	2	0	0	0	0	118	65	57	4.5	0.93	3.44	0	1.09	1.84	23	27	76	19	0	1
52971	1	42	0	0	174	59.8	19.75	2	0	0	1	0	97	60	63	4.4	0.66	3.25	0	1.04	1.96	18	10	74	22	0	1
50445	1	44	1	2	171	95	32.49	4	1	1	1	1	157	99	61	7.4	3.07	5.23	0	1.04	2.98	31	69	65	46	0	1
51746	0	40	0	0	151.5	67.2	29.28	3	0	0	0	0	110	80	88	5.1	0.75	5.15	0	1.86	2.76	17	20	57	16	0	1
51749	0	43	0	0	164	53	19.71	2	0	0	0	0	96	64	69	5.4	0.53	4.39	0	1.69	2.18	23	18	64	13	0	1
56772	0	52	1	1	160	70.2	27.42	3	0	1	1	0	120	80	72	5	2	4.87	0	1.15	3.03	15	13	60	21	0	1
56919	1	25	0	0	175	58.2	19	2	0	1	0	1	113	70	73	5.8	1.85	4.42	0	1.8	2.24	15	15	47	14	0	1
57389	0	58	0	0	145.5	51.7	24.42	2	0	0	0	0	104	76	74	5	1.29	4.36	0	1.89	2.04	52	67	108	38	0	1
57293	1	42	0	0	166.5	77.6	27.99	3	0	1	0	0	125	71	76	4.6	1.73	4.98	0	1.41	3.31	20	19	49	16	0	1
57400	1	33	1	2	182.5	101.8	30.56	4	1	1	0	0	157	106	66	5.4	2.71	6.82	1	1.6	3.39	24	35	72	44	0	1
56684	1	48	0	0	176.5	100.3	32.2	4	0	0	0	0	125	75	87	5.3	0.66	4.2	0	1.6	2.32	13	8	55	10	0	1
56773	0	38	0	0	168.5	62	21.84	2	0	0	0	0	120	80	84	4.9	0.62	3.93	0	1.66	1.98	15	8	35	10	0	1
56907	1	25	0	0	170	65	22.49	2	0	0	0	1	129	71	72	6.2	0.7	4.3	0	1.94	2.24	23	20	71	30	0	1
56918	0	28	0	0	163	45.4	17.09	1	0	0	0	0	100	68	80	5.1	0.41	3.61	0	2	1.44	15	8	54	15	0	1
54847	0	40	0	0	153	52.8	22.56	2	0	0	0	0	100	70	74	4.7	0.67	4.38	0	1.74	1.9	14	12	40	8	0	1
56687	1	45	1	1	165.5	73.2	26.72	3	1	1	0	0	142	95	81	5.1	1.79	4.56	0	1.51	2.8	34	68	99	46	0	1
45656	1	48	0	0	183.5	79.7	23.67	2	0	1	0	1	125	83	67	5.8	3	6.36	1	1.08	3.6	25	34	39	32	0	1
51740	0	40	0	0	168	60.8	21.54	2	0	0	0	0	110	70	77	4.4	1.11	5.04	0	1.65	2.76	18	13	57	18	0	1
51757	0	33	0	0	166	65.6	23.81	2	0	0	0	0	120	80	85	4.5	0.73	4.66	0	1.61	2.67	19	15	77	12	0	1
57264	0	19	0	0	165.5	58.5	21.36	2	0	0	0	0	110	80	70	5	0.39	3.91	0	1.85	1.75	22	27	67	12	0	1
57463	1	40	0	0	163	74	27.85	3	0	0	0	1	115	70	76	5.8	1.33	4.29	0	1.35	2.62	29	54	77	38	0	1
57313	0	52	1	2	165	79.2	29.09	3	1	0	0	1	160	110	84	6	1.47	4.62	0	1.64	2.48	21	38	52	23	0	1
57396	0	41	0	0	163	61.6	23.18	2	0	0	0	0	100	70	72	5	1.11	5.14	0	1.5	2.7	24	26	63	17	0	1
57481	0	24	0	0	154	48.3	20.37	2	0	0	0	0	100	70	66	5.2	0.68	4.64	0	2.7	1.63	15	11	42	15	0	1
56693	1	43	1	2	179.5	83.4	25.88	3	0	1	0	0	125	80	71	4.9	2.64	6.23	1	1.26	4.5	21	40	95	57	0	1
56729	0	31	0	0	160	46.1	18.01	1	0	0	0	0	110	80	74	4.5	0.51	5.13	0	2	2.49	38	33	58	23	0	1
56730	0	30	0	0	164.5	51.1	18.88	2	0	0	0	0	100	72	74	4.5	0.65	5.29	0	3.05	2.16	17	14	55	14	0	1
56744	0	25	0	0	157	46.8	18.99	2	0	0	0	0	100	70	87	4.7	0.71	5.01	0	1.98	2.75	17	10	45	12	0	1
56844	0	59	0	0	157.5	62.7	25.28	3	0	0	0	0	100	70	63	5.5	0.58	4.63	0	1.79	1.89	18	19	42	16	0	1
56689	1	45	1	1	178.5	83	26.05	3	1	1	0	0	137	88	78	5.1	2.22	4.68	0	1.6	2.62	22	12	52	33	0	1
56691	1	45	1	2	177.5	84.7	26.88	3	1	1	0	1	141	96	77	8.3	8.7	5.32	0	1.3	2	26	37	67	118	0	1
56725	1	23	0	0	170	63.8	22.08	2	0	0	0	0	127	75	63	4.9	1.02	3.11	0	1.4	1.38	22	35	49	14	0	1
56793	0	28	0	0	158.5	48.7	19.39	2	0	0	0	0	110	76	74	5.1	1.37	4.71	0	2.5	1.9	17	8	56	10	0	1
56893	0	28	0	0	163	49.7	18.71	2	0	0	0	0	102	72	80	4.8	0.62	4.88	0	2.2	2.34	12	13	51	14	0	1
55663	1	32	1	2	182.5	90.8	27.26	3	0	1	0	0	129	84	88	5.2	2.18	4.97	0	1.29	3.02	33	72	55	24	0	1
56731	0	50	0	0	162.5	51.7	19.58	2	0	0	0	0	110	76	79	5.3	1.01	4.91	0	2.13	2.51	19	15	90	10	0	1
56756	0	24	0	0	162	52.8	20.12	2	0	0	0	0	120	82	88	4.6	1.42	4.85	0	2.52	1.94	14	7	52	11	0	1
56767	0	21	0	0	161	50.5	19.48	2	0	0	0	0	96	64	72	3.8	0.79	3.71	0	1.77	1.6	15	8	62	12	0	1
56899	0	26	0	0	160	56.5	22.07	2	0	0	0	0	120	80	71	4.9	0.49	5.33	0	2.35	2.75	23	16	41	21	0	1
51702	1	41	1	1	171.5	63	21.42	2	1	1	1	0	133	86	85	4.8	3.22	4.83	0	1.02	2.68	27	37	81	29	0	1
51734	0	47	0	0	162.5	60.6	22.95	2	0	0	0	0	110	80	74	4.7	0.6	4.29	0	1.66	2.19	18	19	44	44	0	1
51736	0	48	0	0	166.5	74.4	26.84	3	0	0	0	0	106	70	72	5	1.12	5.36	0	1.64	2.69	15	18	51	16	0	1
51768	0	47	1	2	156	63.6	26.13	3	1	0	0	0	130	90	86	4.4	1.3	4.97	0	1.39	2.98	19	18	114	22	0	1
57290	1	32	0	0	174.5	64.5	21.18	2	0	0	0	0	99	66	77	4.9	1.05	4.55	0	1.62	2.61	18	26	54	20	0	1
57371	1	56	0	0	174	67.7	22.36	2	0	0	0	1	112	66	66	6.4	1.6	4.46	0	1.64	2.66	21	21	52	13	0	1
57456	1	53	1	1	155.5	67.6	27.96	3	1	1	0	1	138	94	77	7.8	2.17	5.66	0	1.89	3.34	14	17	69	39	0	1
57605	0	35	0	0	163	54.7	20.59	2	0	0	0	0	100	70	73	5.1	0.86	4.53	0	2.42	1.82	21	14	32	14	0	1
57607	1	27	0	0	173.5	66.2	21.99	2	0	0	0	1	123	69	95	5.6	0.99	7.93	1	1.72	5.64	16	8	71	11	0	1
51731	1	42	0	0	171.5	73.8	25.09	3	0	1	0	0	123	80	93	4.7	1.93	4.28	0	1.2	2.38	20	21	104	18	0	1
51750	0	41	0	0	165.5	62	22.64	2	0	0	0	0	100	70	81	5.2	0.83	3.82	0	1.48	1.81	17	17	52	23	0	1
51764	0	42	0	0	165.5	53.9	19.68	2	0	0	0	0	94	64	66	4.3	0.61	3.95	0	1.45	1.88	21	35	69	26	0	1
51735	0	33	0	0	172	60.6	20.48	2	0	0	0	0	100	70	65	4.6	1.07	4.02	0	1.45	1.92	14	12	43	8	0	1
51742	0	40	0	0	162.5	59	22.34	2	0	0	0	0	90	60	70	5.3	0.56	3.54	0	1.41	1.58	16	16	54	11	0	1
57574	0	32	0	0	162.5	55.6	21.06	2	0	0	0	1	100	70	69	5.8	0.62	4.31	0	2.34	1.75	13	13	46	24	0	1
57591	1	36	1	1	184.5	92.6	27.2	3	1	0	0	0	122	87	69	5.3	1.6	5.64	0	1.53	3.55	20	34	45	32	0	1
57708	0	50	0	0	163	72	27.1	3	0	1	0	1	126	80	77	5.8	3.2	6.46	1	1.54	4.13	19	19	57	17	0	1
46732	1	29	0	0	171.5	64.8	22.03	2	0	0	0	0	125	78	82	4.7	0.82	3.67	0	1.14	1.89	19	19	66	16	0	1
51737	0	32	0	0	166	55.6	20.18	2	0	0	1	0	120	78	82	4.7	1.14	3.77	0	1.15	2.27	11	12	85	21	1	2
51762	0	49	0	0	171	54.6	18.67	2	0	0	0	0	100	70	75	4.6	0.63	4.39	0	1.95	1.66	16	11	76	11	0	1
51769	0	39	0	0	166.5	68.5	24.71	2	0	1	0	0	100	70	74	4.9	1.83	6.04	1	1.79	3.17	21	22	39	23	0	1
57570	1	30	0	0	175	66.7	21.78	2	1	0	0	0	131	83	66	5.4	0.87	5.84	0	2.33	2.86	20	11	51	18	0	1
57661	1	45	0	0	168	69.8	24.73	2	1	1	0	1	133	79	66	6.9	2.59	6.07	1	1.57	3.78	34	62	70	32	0	1
57668	1	37	0	0	175	77.2	25.21	3	0	0	1	1	120	73	70	5.6	0.85	4.94	0	1.02	2.87	29	49	48	20	0	1
57761	0	29	0	0	158.5	44.3	17.63	1	0	0	0	0	100	70	72	5.1	0.37	4.72	0	1.82	2.26	15	8	62	12	0	1
57768	1	35	1	1	171.5	72.4	24.62	2	0	0	0	1	127	73	81	6.3	1.09	4.64	0	1.31	2.92	25	29	63	16	0	1
46661	0	34	0	0	164	51.3	19.07	2	0	0	0	0	90	60	66	4.9	0.81	3.43	0	1.77	1.06	20	8	51	11	0	1
51758	0	38	0	0	157.5	64.5	26	3	0	0	1	0	110	80	80	4.2	0.99	4.25	0	1.28	2.31	25	25	65	23	0	1
51710	1	55	1	1	171	78	26.67	3	0	1	0	0	118	74	78	4.3	2.53	4.79	0	1.16	2.51	19	20	71	41	0	1
51704	1	49	0	0	182	74.6	22.52	2	0	1	0	0	118	82	71	4.7	1.82	6.05	1	1.48	3.96	23	30	58	20	0	1
48539	1	42	0	0	185	82.6	24.13	2	1	0	0	0	131	81	54	4.9	1.26	4.05	0	1.55	1.51	24	26	42	36	0	1
49575	1	25	1	1	176.5	72.4	23.24	2	1	0	0	1	147	86	66	7.2	1.18	4.72	0	1.37	2.65	16	19	126	26	0	1
51698	1	35	1	1	175	86	28.08	3	1	1	1	0	122	86	80	4.8	3.29	4.2	0	0.97	2.14	27	56	52	35	0	1
51730	1	42	1	1	163	64.8	24.39	2	0	1	0	0	120	82	81	5.1	7.33	7.11	1	1.65	2.99	29	28	68	72	0	1
48668	1	23	1	1	178.5	84.4	26.49	3	0	1	1	0	112	72	65	4	5.07	4.27	0	0.81	2.27	20	30	65	31	0	1
51719	1	37	0	0	184	80.7	23.84	2	1	0	0	0	136	85	76	4.8	1.42	4.01	0	1.29	1.89	11	14	81	15	0	1
51726	1	42	0	0	166	59.6	21.63	2	0	0	0	0	105	63	90	4.8	1.41	5.21	0	1.52	2.7	23	27	74	55	0	1
51744	0	40	0	0	164	51.3	19.07	2	0	0	0	0	96	60	71	4.6	0.53	3.59	0	1.62	1.37	15	16	55	17	0	1
54368	1	38	1	2	170	86	29.76	3	0	1	0	1	120	68	60	6.8	1.98	5.45	0	1.45	3.18	34	73	44	47	0	1
55561	0	28	0	0	168	50	17.72	1	0	0	0	1	100	70	84	5.7	0.74	3.83	0	2.01	1.66	14	6	47	14	0	1
56683	1	51	1	1	172	80.9	27.35	3	0	1	0	1	127	83	66	16.2	3.26	6.44	1	1.49	4.61	28	49	65	44	0	1
56701	1	40	0	0	173	66	22.05	2	0	1	0	0	122	81	83	5	4.85	5.14	0	1.68	2.72	14	16	72	42	0	1
56702	1	38	1	1	172.5	72	24.2	2	0	0	0	0	107	73	73	5	1.09	4.57	0	1.83	2.52	19	23	74	36	0	1
56704	1	40	1	2	175	98	32	4	1	1	0	0	134	85	91	4.9	3.03	5.85	0	1.3	3.97	34	51	64	54	0	1
56719	1	26	0	0	178	67.9	21.43	2	1	0	0	0	130	68	73	5.1	0.82	4.22	0	2.08	1.91	17	10	49	19	0	1
56721	1	25	0	0	176	75.7	24.44	2	0	0	0	0	123	60	60	5.4	0.73	3.86	0	2.17	1.47	22	23	62	38	0	1
56753	0	24	0	0	167	51.1	18.32	1	0	0	0	0	100	70	72	4.6	1.31	5.26	0	1.97	2.92	16	6	54	14	0	1
56755	0	24	0	0	158	56.2	22.51	2	0	0	0	0	120	80	80	4.6	1.2	3.38	0	1.54	1.57	24	24	39	14	0	1
56785	0	30	0	0	156.5	50.7	20.7	2	0	0	0	0	110	74	77	4.9	0.84	4.72	0	2.49	2.15	16	10	85	10	0	1
57496	1	51	1	1	173	82.6	27.6	3	0	1	1	1	111	60	80	6	3.57	4.24	0	0.94	2.04	32	44	58	104	0	1
57681	1	26	1	1	171	78.5	26.85	3	0	1	1	0	114	68	69	4.8	3.8	4.26	0	0.86	2.07	18	26	57	29	0	1
57696	0	22	0	0	158.5	47.9	19.07	2	0	0	0	0	94	66	71	5.2	0.66	5.52	0	1.76	2.69	14	11	67	11	0	1
57763	1	41	0	0	175.5	79.4	25.78	3	0	0	1	1	120	76	84	6.5	1.59	3.43	0	0.93	1.95	133	220	73	74	0	1
57913	0	33	0	0	149	48	21.62	2	0	0	0	0	100	70	74	4.9	1.2	3.15	0	1.36	1.05	15	12	79	30	0	1
52446	0	48	1	2	166.5	65	23.45	2	0	1	0	0	100	70	72	5.3	1.84	5.1	0	1.52	2.71	20	45	67	29	0	1
52489	1	26	0	0	173	70	23.39	2	0	0	1	0	113	72	74	4.7	0.88	3.79	0	1.04	2.19	29	23	80	16	0	1
57343	0	53	1	1	157.5	59.3	23.91	2	1	1	1	0	144	90	71	5.2	2.3	5.13	0	1.15	3.21	24	28	115	25	0	1
57375	0	44	0	0	166.5	61.3	22.11	2	0	0	0	1	102	70	68	5.9	1.26	5.3	0	1.7	3.45	14	7	56	12	0	1
57409	1	50	0	0	171.5	75.7	25.74	3	0	0	0	0	129	76	70	5	1.26	4.12	0	1.98	1.85	23	17	32	24	0	1
57584	1	47	1	1	165	72.5	26.63	3	1	1	0	0	128	87	65	5.2	2.44	6.48	1	1.4	4.04	21	32	76	27	0	1
57310	0	48	0	0	153.5	51.6	21.9	2	1	0	0	1	130	88	98	5.6	0.75	3.79	0	1.97	1.71	23	15	90	10	0	1
57378	0	56	0	0	158	64.1	25.68	3	1	1	0	1	146	96	84	5.6	3.85	4.44	0	1.46	2.35	30	16	111	23	0	1
56708	1	31	1	1	172.5	76.8	25.81	3	0	0	0	1	113	69	84	5.7	1.05	4.61	0	1.84	2.42	24	32	57	34	0	1
56726	1	22	0	0	185.5	93.6	27.2	3	1	0	0	0	140	82	97	4.8	1.51	4.97	0	1.65	2.72	25	38	81	22	0	1
56758	0	23	0	0	155	47.7	19.85	2	0	0	0	1	110	80	74	5.7	1.53	4.81	0	1.79	2.22	16	6	50	12	0	1
56765	0	22	0	0	157	55.6	22.56	2	0	0	0	0	100	70	89	5.1	0.71	4.44	0	2	2.09	19	15	52	10	0	1
56776	0	34	0	0	158.5	60.3	24	2	1	0	0	1	136	96	70	5.8	0.87	4.6	0	2	2.42	21	26	67	20	1	2
57791	0	46	0	0	162	65	24.77	2	0	1	0	1	100	70	56	5.9	1.72	4.95	0	1.57	2.69	24	27	62	12	0	1
57821	0	33	0	0	154.5	60.6	25.39	3	0	1	0	0	100	70	80	5.1	3.69	6.25	1	1.49	3.57	20	23	78	30	0	1
57942	1	41	0	0	168.5	71.4	25.15	3	0	1	0	1	115	78	79	5.6	3.02	6.61	1	1.18	4.68	19	40	97	68	0	1
58008	0	30	0	0	158	52	20.83	2	0	0	0	0	100	70	74	5.4	1	5.48	0	2.02	2.58	20	10	60	11	0	1
58072	1	56	1	1	180	86.2	26.6	3	1	1	0	1	129	97	62	5.8	5.55	5.29	0	1.3	2.89	22	35	51	70	0	1
58157	0	36	0	0	153	56.8	24.26	2	0	1	1	0	104	70	69	4.9	2.33	5.01	0	1.29	2.62	14	11	53	13	0	1
57982	1	51	0	0	165.5	67.6	24.68	2	1	0	0	0	140	93	76	5.5	0.91	4.9	0	1.41	2.66	18	13	70	11	0	1
58031	1	32	0	0	177.5	81.3	25.8	3	0	0	0	1	121	67	66	6	0.88	3.6	0	1.1	1.79	19	31	82	25	0	1
58050	1	65	0	0	175	74.4	24.29	2	0	0	0	1	123	68	62	5.9	1.05	5	0	1.6	2.41	24	18	72	19	0	1
58117	0	24	0	0	165.5	52.8	19.28	2	0	0	1	0	96	64	66	5.5	0.66	3.79	0	1.18	2.07	13	10	51	11	0	1
58149	0	29	0	0	159.5	62.3	24.49	2	0	0	0	0	100	70	NULL	5.3	1.04	5.19	0	1.41	2.88	33	51	60	12	0	1
57707	1	48	0	0	168.5	73	25.71	3	1	0	0	0	131	90	64	5.3	1.29	5.81	0	1.29	3.2	20	23	37	17	0	1
57741	1	49	1	1	174.5	94.4	31	4	1	1	0	0	141	97	81	4.8	6.75	5.65	0	1.3	2.1	26	31	50	37	0	1
57771	1	22	0	0	177	59.2	18.9	2	0	0	0	1	126	77	85	5.9	0.67	4.37	0	1.45	2.18	20	11	54	14	0	1
57807	0	57	0	0	152.5	53.4	22.96	2	0	1	0	1	116	78	66	6	2.02	7.87	1	1.68	5.78	29	15	75	18	0	1
56787	0	29	0	0	161	64.6	24.92	2	0	0	0	0	110	76	68	5.4	0.76	3.93	0	1.66	2.05	19	15	40	13	0	1
56887	0	28	0	0	160	70.2	27.42	3	0	0	0	1	120	80	79	7.1	1.15	4.3	0	2.1	2.01	18	16	72	17	0	1
56889	0	25	1	1	157	61.6	24.99	2	0	1	0	1	110	80	82	5.8	6.42	5.31	0	1.61	1.82	22	26	67	29	0	1
56938	1	29	0	0	177.5	87	27.61	3	1	0	0	0	131	76	74	5	1.61	6.21	1	1.8	3.69	22	34	80	22	0	1
57323	0	58	0	0	162.5	68.2	25.83	3	0	0	0	0	120	80	58	5.5	0.72	5	0	1.88	2.98	15	10	69	14	0	1
52405	1	40	0	0	171	65	22.23	2	0	0	0	0	109	62	70	4.6	1.69	4.97	0	1.72	2.76	18	13	78	15	0	1
52444	1	31	0	0	172	82	27.72	3	0	0	1	0	109	63	77	5.2	1.3	3.76	0	1.03	2.17	18	21	74	22	0	1
57614	1	38	1	1	172	85.2	28.8	3	0	1	1	1	127	78	73	6.2	8.03	5.07	0	1.03	1.57	21	36	57	44	0	1
57663	1	55	0	0	155.5	65	26.88	3	1	1	0	1	158	93	67	6.9	2.07	6.39	1	1.29	3.53	19	17	82	25	0	1
57746	1	55	0	0	166	57.7	20.94	2	0	0	0	0	122	74	59	4.6	0.84	4.15	0	1.22	2.13	20	20	102	16	0	1
57900	1	45	1	1	171.5	77	26.18	3	0	1	0	1	118	73	81	5.6	2.1	3.89	0	1.17	1.91	21	26	57	23	0	1
56900	0	23	0	0	158	46.8	18.75	2	0	0	0	1	100	70	72	5.8	0.84	4.99	0	2.23	2.64	17	9	49	12	0	1
56934	1	31	1	1	171.5	79.7	27.1	3	1	1	0	0	139	87	92	5.3	2.97	5.39	0	1.32	3.08	17	17	58	35	0	1
56930	0	30	1	1	159	62	24.52	2	0	0	0	0	100	70	78	5.3	1.39	3.66	0	1.3	1.81	21	31	59	21	0	1
57298	1	39	1	1	170.5	84.9	29.21	3	1	0	0	0	131	87	76	4.5	1.35	5.15	0	1.92	2.97	36	52	75	46	0	1
57347	1	38	0	0	178	83	26.2	3	1	0	0	0	130	75	84	5.5	1.66	4.86	0	1.79	2.8	19	21	55	21	0	1
57365	1	48	0	0	165.5	62.9	22.96	2	0	0	0	1	121	73	71	5.6	1.28	4.57	0	1.57	2.81	20	11	83	20	0	1
57498	1	41	0	0	171.5	75.8	25.77	3	1	1	0	0	135	75	71	4.8	1.81	4.54	0	1.1	2.63	27	43	99	26	0	1
57675	1	56	0	0	164	66.6	24.76	2	0	0	0	1	127	76	65	5.8	1.64	6.6	1	1.43	4.01	20	24	78	21	0	1
57709	0	41	0	0	155.5	66.6	27.54	3	0	1	1	1	126	84	73	6.2	2.46	5.6	0	1.14	3.73	19	10	41	14	0	1
57711	0	18	0	0	163	50.3	18.93	2	0	0	1	0	100	70	103	5.2	1.35	3.74	0	1.06	2.02	20	13	55	8	0	1
57743	1	43	1	1	173.5	76.2	25.31	3	0	1	0	0	111	76	75	5.1	2.14	8.22	1	1.54	4.89	52	126	66	112	0	1
57745	1	36	0	0	174.5	74.4	24.43	2	1	0	0	1	130	77	88	5.8	1.65	7.76	1	1.54	4.51	28	37	57	53	0	1
57517	1	55	0	0	171.5	81.6	27.74	3	0	0	0	1	116	72	69	5.9	1.54	6.06	1	2.03	3.46	21	22	62	43	0	1
57535	1	52	0	0	169	63.4	22.2	2	0	0	0	0	119	75	70	4.9	0.62	5.66	0	2.8	2.34	22	16	53	16	0	1
57560	0	30	0	0	159	51.6	20.41	2	0	0	0	0	110	70	76	4.6	0.74	4.58	0	2.24	2.08	21	16	46	20	0	1
57628	0	48	0	0	160	62.3	24.34	2	0	0	0	0	120	80	72	5.4	1.35	6.08	1	1.88	3.62	15	11	32	13	0	1
57294	0	58	0	0	164.5	63.3	23.39	2	0	1	0	0	120	80	78	5.5	2.08	5.27	0	2	3.1	34	37	120	19	0	1
57333	1	35	0	0	175	93.2	30.43	4	1	1	0	1	132	95	83	5.7	4.2	5.27	0	1.63	2.78	20	26	86	189	0	1
57358	1	50	0	0	171	73.1	25	3	0	0	0	0	110	70	58	5	1.26	3.31	0	1.38	1.47	26	44	46	38	0	1
52432	0	36	1	1	153	58	24.78	2	0	0	0	0	110	70	74	4.5	1.2	5.11	0	1.63	2.84	15	19	58	17	0	1
52985	0	24	0	0	163	44.7	16.82	1	0	0	0	0	110	70	74	5	0.72	4.41	0	1.72	1.73	12	10	44	7	0	1
52983	0	23	0	0	162	66.8	25.45	3	0	0	0	0	100	70	74	4.6	0.57	3.97	0	1.4	1.9	14	11	92	12	0	1
55659	0	33	0	0	154.5	68.8	28.82	3	0	0	0	0	110	70	73	5.1	1.69	4.52	0	1.36	2.57	15	8	52	24	0	1
57822	1	40	1	2	168	99	35.08	4	0	1	0	1	124	75	79	9.4	3.63	5.28	0	1.15	3.17	23	35	66	32	0	1
57858	1	42	0	0	172	69	23.32	2	0	1	0	0	115	67	73	5.1	4.34	6.76	1	1.32	3.5	19	17	67	22	0	1
57907	1	42	1	1	175.5	78.7	25.55	3	0	0	0	1	123	73	81	5.8	1.44	4.59	0	1.14	2.61	20	31	69	27	0	1
57922	1	44	0	0	178	71	22.41	2	0	0	0	0	112	78	96	5.3	0.55	4.63	0	1.61	2.03	18	16	68	13	0	1
57990	1	42	0	0	169	69	24.16	2	0	0	1	0	107	72	91	4.9	1.16	4.56	0	0.97	2.98	15	6	67	20	0	1
57992	0	37	1	1	165	65	23.88	2	0	1	0	1	100	70	76	6.1	1.75	4.94	0	1.3	2.93	17	25	69	23	0	1
58176	1	37	0	0	174	63	20.81	2	0	1	0	0	119	69	64	5.5	2.04	7.18	1	1.86	4.01	17	13	74	20	0	1
58257	1	50	1	2	176.5	88.7	28.47	3	0	1	0	1	123	81	80	8.4	1.83	4.75	0	1.19	2.94	34	55	64	46	0	1
58342	1	53	0	0	179.5	97.4	30.23	4	1	1	0	0	129	98	101	5.3	2.08	6.27	1	1.55	3.95	28	41	63	124	0	1
58410	0	45	0	0	161	55.6	21.45	2	0	0	0	0	120	80	91	5.3	1.07	5.14	0	1.87	2.43	20	10	50	12	0	1
58442	0	36	0	0	157	48.2	19.55	2	0	0	0	0	118	76	80	4.7	0.65	4.66	0	1.76	2.05	32	22	43	11	0	1
52980	0	37	0	0	163.5	50.8	19	2	0	0	0	1	110	76	82	5.6	0.56	4.03	0	1.73	1.88	34	50	63	14	0	1
55531	0	26	0	0	166	52.8	19.16	2	0	0	0	0	110	70	72	4.8	0.82	4.58	0	2.03	2.18	17	7	42	12	0	1
56706	1	39	0	0	170.5	77.6	26.69	3	1	0	0	0	137	83	87	5.1	1.5	4.42	0	1.53	2.36	22	36	82	113	0	1
57372	0	56	1	1	155	61	25.39	3	1	1	0	0	150	90	72	5.5	2.33	4.14	0	1.84	2.02	21	17	51	23	0	1
57455	1	31	1	1	172	77.6	26.23	3	1	1	0	1	138	86	82	15.1	15.84	7.8	1	1.38	2.15	16	20	79	47	0	1
57457	0	26	0	0	154.5	59.4	24.88	2	0	0	0	0	100	70	72	4.8	0.67	4.35	0	2.49	1.64	16	8	34	13	0	1
57487	0	40	0	0	157	50.1	20.33	2	0	1	0	0	100	70	68	4.7	2.49	5.61	0	2.5	2.56	18	19	44	10	0	1
57538	1	33	0	0	172	67.4	22.78	2	0	0	0	0	112	72	78	4.9	1	5.02	0	2.22	2.27	25	24	69	21	0	1
57540	1	31	0	0	183	89	26.58	3	1	1	0	0	130	82	79	5.2	2.12	3.93	0	1.07	1.96	18	26	103	20	0	1
57836	0	62	0	0	159.5	49.2	19.34	2	1	0	0	1	130	80	77	6.2	1.3	5.83	0	1.72	3.34	46	60	71	22	0	1
57859	1	39	0	0	170	69.4	24.01	2	1	1	0	1	140	86	106	8.1	9.14	5.04	0	1.39	1.4	25	26	75	52	0	1
57934	0	54	0	0	158	54.6	21.87	2	0	0	0	1	106	72	64	5.7	1.43	5.27	0	1.5	2.73	14	11	57	10	0	1
57961	0	54	1	1	152	71.6	30.99	4	0	1	1	1	120	66	71	5.8	2.24	4.64	0	1.11	2.7	24	28	63	37	0	1
57963	1	29	0	0	176.5	54	17.33	1	0	0	0	0	111	65	93	5.4	0.64	4.45	0	1.63	1.97	32	53	58	18	0	1
57914	1	36	0	0	169	74.2	25.98	3	0	0	0	1	129	82	82	5.7	1.42	4.93	0	1.18	2.79	15	16	54	30	0	1
57949	1	37	0	0	184	68.7	20.29	2	1	0	0	0	141	78	94	5.3	1.21	5.05	0	1.51	2.8	15	12	85	20	0	1
57981	1	28	0	0	173	60.2	20.11	2	0	0	0	0	120	72	75	5.4	0.66	3.88	0	1.3	1.96	27	30	110	21	0	1
57999	1	59	0	0	174.5	76.1	24.99	2	0	0	0	1	115	77	67	5.8	1.02	5.09	0	1.39	3.15	24	28	57	22	0	1
58000	1	50	0	0	175.5	53.3	17.31	1	0	0	0	0	108	63	79	5.3	0.78	6.06	1	1.96	3.23	24	25	57	14	0	1
58017	0	35	0	0	165	50.9	18.7	2	0	0	0	0	106	70	78	5.4	1.04	5.1	0	1.54	2.64	22	22	41	12	0	1
51708	1	36	1	1	178	78	24.62	2	1	1	0	1	133	85	93	17.3	3.43	5.6	0	1.25	2.72	25	35	94	71	0	1
51738	0	47	0	0	159	62	24.52	2	0	1	0	0	120	80	66	4.6	1.92	5.31	0	1.54	3.19	19	20	52	26	0	1
57434	0	27	0	0	153	51.7	22.09	2	0	0	1	0	120	80	74	4.8	0.33	2.85	0	1.27	1.3	15	7	51	12	0	1
57461	1	43	1	1	179.5	87.6	27.19	3	1	1	0	0	147	99	65	4.6	7.88	6.51	1	1.36	3.7	29	35	55	52	0	1
57468	1	38	0	0	177.5	83.8	26.6	3	0	1	0	1	122	83	86	5.7	3.89	5.46	0	1.92	3.24	26	32	104	239	0	1
57536	0	51	0	0	155.5	50.9	21.05	2	1	0	0	0	150	98	72	5.4	0.87	5.27	0	2.4	2.49	21	15	71	19	0	1
57561	0	53	0	0	162.5	52.3	19.81	2	0	0	0	0	126	80	79	5.3	1.26	5.62	0	2.15	3.24	14	9	104	17	0	1
57512	1	58	1	1	169	82.8	28.99	3	1	1	0	1	133	80	65	6.8	5.24	5.08	0	1.28	2.27	21	26	63	24	0	1
57565	0	46	0	0	160	56.4	22.03	2	0	0	0	0	110	70	67	5.5	1.69	5.67	0	2.02	3.12	16	8	45	14	0	1
57566	1	35	1	1	176	86.2	27.83	3	1	1	0	1	138	96	80	5.8	8.18	6.08	1	1.32	2.41	22	35	51	72	0	1
57648	0	28	0	0	156	50.3	20.67	2	0	0	0	0	100	70	72	4.8	0.47	4.49	0	2.07	2.2	24	17	30	9	0	1
57666	1	37	1	1	170.5	75.2	25.87	3	0	0	1	1	126	75	83	6.9	1.06	4.83	0	0.97	2.96	26	62	68	41	0	1
57683	0	50	0	0	156	51.1	21	2	0	1	1	1	116	74	99	5.9	2.41	5.9	0	1.1	3.58	17	26	55	22	0	1
57653	0	49	1	1	148.5	62.2	28.21	3	1	1	0	1	140	96	76	6	1.8	5.84	0	2.05	3.48	25	26	56	18	0	1
57742	1	39	1	1	171	79.2	27.09	3	1	1	0	0	141	99	108	5.1	2.52	8.86	1	1.53	5.24	26	58	62	34	1	2
57760	0	50	0	0	170	58	20.07	2	1	0	0	0	140	94	73	5	1.25	4.73	0	1.48	2.39	19	17	78	9	0	1
57828	1	60	0	0	169	64.1	22.44	2	0	1	0	1	127	72	70	6.4	2.79	6.77	1	1.62	4.16	21	12	51	20	0	1
58385	0	58	0	0	158	51	20.43	2	0	0	0	0	96	66	63	5.2	0.61	6.06	1	1.64	3.43	24	17	51	10	0	1
58500	1	38	1	1	175.5	89	28.9	3	0	1	1	0	110	76	83	4.8	2.55	4.94	0	1.03	2.73	21	32	65	31	0	1
58735	0	37	0	0	165	56.5	20.75	2	0	0	0	0	120	80	74	5.2	1.46	5.05	0	1.67	2.56	33	30	66	22	0	1
57533	1	40	0	0	158	55.6	22.27	2	0	0	0	0	110	66	80	4.7	1.3	5.31	0	1.58	3.25	20	18	62	13	0	1
57583	1	29	0	0	165	69.2	25.42	3	0	0	0	1	121	66	63	5.6	1.31	5.25	0	1.68	3.15	16	12	46	13	0	1
57644	1	43	0	0	172	72	24.34	2	0	0	0	0	114	74	66	5.2	1.28	2.81	0	1.51	1.03	23	25	54	26	0	1
57651	1	34	0	0	162	69.2	26.37	3	0	1	0	0	107	68	63	4.7	4.39	4.89	0	1.06	2.28	34	72	61	97	0	1
58457	0	45	0	0	160	56.6	22.11	2	0	0	0	0	104	72	78	5.2	1.57	5.38	0	1.39	3.33	15	11	51	23	0	1
58625	1	40	1	1	168	80.6	28.56	3	0	0	0	1	111	69	66	5.8	0.92	5.36	0	1.1	3.42	17	27	76	21	0	1
58640	1	38	0	0	173	71	23.72	2	0	0	0	0	114	71	88890000000000	4.6	0.55	4.44	0	1.14	2.43	18	19	79	16	0	1
58674	1	50	0	0	165	62	22.77	2	0	1	0	1	124	72	81	6	2.56	7.19	1	1.56	4.39	23	38	82	29	0	1
57820	0	38	0	0	168	74.2	26.29	3	0	1	0	0	120	84	76	5.4	1.79	5.2	0	1.62	2.22	15	17	76	29	0	1
57843	0	31	0	0	153.5	62.7	26.61	3	0	1	1	1	100	70	74	6.8	2.31	4.72	0	1.12	2.67	13	10	64	23	0	1
57845	0	34	0	0	156	47.6	19.56	2	0	0	0	1	100	70	86	6	0.54	3.69	0	1.67	1.31	15	6	69	11	0	1
57852	0	21	0	0	165	62.3	22.88	2	0	0	1	1	100	70	58	5.6	0.7	4.86	0	1.26	3.08	13	6	29	10	0	1
57984	0	56	0	0	159.5	61	23.98	2	0	1	0	0	110	80	85	4.9	2.26	5.84	0	1.31	3.7	26	32	69	20	1	2
56749	0	24	0	0	159	62	24.52	2	0	0	0	0	100	70	68	4.8	1.63	4.17	0	1.6	2.04	14	13	81	16	0	1
56774	0	37	1	1	154	63.8	26.9	3	0	0	0	1	100	70	89	5.9	1.47	5.44	0	1.78	3.42	85	114	77	79	0	1
56792	0	28	0	0	159	43.2	17.09	1	0	0	0	0	110	76	96	5.2	0.57	5.02	0	2.31	2.48	20	11	57	13	0	1
56906	0	22	0	0	159	57.2	22.63	2	0	0	0	0	100	70	74	4.6	0.67	4.31	0	2.49	1.61	17	9	43	10	0	1
56942	0	47	0	0	163.5	62.2	23.27	2	1	0	0	0	130	88	86	5.5	1.42	4.28	0	1.55	2.34	21	18	48	19	0	1
58131	0	48	0	0	166	69	25.04	3	1	0	0	0	160	100	63	5.2	0.73	4.61	0	1.55	2.05	19	17	51	15	0	1
58150	0	29	0	0	152	52.2	22.59	2	0	0	0	0	100	70	100	5.1	0.99	6.1	1	1.83	3.52	16	17	45	10	0	1
58164	0	48	0	0	163.5	61.7	23.08	2	1	1	0	1	136	96	86	5.6	1.71	6.37	1	1.81	3.45	22	22	65	13	0	1
58249	0	50	0	0	161	65.9	25.42	3	0	0	0	0	120	80	73	5.3	1.02	5.04	0	1.43	2.94	25	29	47	13	0	1
58250	0	42	0	0	152	45.5	19.69	2	0	0	0	0	110	70	66	5.1	1.47	5.19	0	1.45	3.15	17	6	52	10	0	1
58299	0	26	0	0	157.5	57	22.98	2	0	0	0	0	100	70	72	4.6	1.34	6.16	1	1.87	3.27	35	42	64	39	0	1
58063	0	50	0	0	146	59.2	27.77	3	0	1	0	0	126	80	76	5.4	1.98	6.87	1	1.58	4.54	24	22	68	22	0	1
58068	1	49	1	1	171.5	80.8	27.47	3	1	1	0	1	135	93	81	7.6	2.17	5.56	0	1.36	3.61	19	26	86	55	0	1
58136	1	50	1	1	168	73.8	26.15	3	1	1	0	1	127	89	83	5.8	3.57	7.99	1	1.67	5.41	23	16	63	204	0	1
58163	1	50	0	0	166.5	73.2	26.4	3	0	0	0	1	120	80	88	5.9	1.5	4.81	0	1.61	2.19	36	63	58	24	0	1
58168	1	65	0	0	163.5	58.2	21.77	2	0	1	0	1	119	60	69	5.6	2.48	5.15	0	1.45	2.57	34	15	99	39	0	1
58193	0	51	0	0	158	62.9	25.2	3	0	1	0	1	120	80	76	6.4	2.14	6.26	1	1.46	3.77	21	20	66	26	0	1
57572	0	29	0	0	155	53	22.06	2	0	0	0	0	100	70	74	5.3	0.89	4.27	0	1.8	2.03	17	15	59	10	0	1
57606	1	40	0	0	167.5	64.4	22.95	2	0	0	0	0	124	74	81	5	1.17	4.73	0	2.33	2.17	20	14	71	21	0	1
57672	0	30	0	0	150	62.2	27.64	3	0	0	0	1	100	70	80	5.8	1.28	5.4	0	1.35	3.04	18	10	50	14	0	1
57691	1	34	0	0	174.5	59	19.38	2	0	0	0	0	126	71	73	4.7	0.65	4.24	0	1.23	1.75	34	30	59	25	0	1
57740	1	50	0	0	174.5	82.2	26.99	3	1	1	0	0	132	87	82	4.6	2.12	7.14	1	1.52	3.8	27	39	69	28	0	1
57634	1	45	0	0	170	82.2	28.44	3	1	0	0	0	138	94	84	5.1	1.56	4.69	0	1.64	2.51	18	14	54	17	0	1
57670	1	54	0	0	174	87.6	28.93	3	0	1	0	0	120	63	81	5.2	2.26	5.06	0	1.4	2.4	27	37	68	34	0	1
57793	0	33	0	0	170	62.6	21.66	2	0	1	0	1	106	68	71	6.2	1.85	4.02	0	1.36	1.98	18	16	40	16	0	1
57827	1	48	0	0	170	67.2	23.25	2	0	0	0	1	114	65	60	6.6	1.39	5.09	0	1.29	3.27	23	12	84	23	0	1
57895	0	55	0	0	166	61.7	22.39	2	0	1	1	1	110	70	83	15.5	2.08	5.01	0	1.26	2.68	24	39	108	19	0	1
57968	0	47	0	0	160	64.5	25.2	3	0	0	1	0	110	76	73	4.8	1.52	4.83	0	1.15	2.89	21	20	82	10	0	1
57697	0	54	0	0	158	61.4	24.6	2	0	0	0	1	120	80	62	5.6	1.37	7.65	1	1.43	5.14	18	14	78	12	0	1
57730	1	36	0	0	169	55.4	19.4	2	0	0	0	0	107	63	84	5.1	1.13	4.05	0	1.47	1.4	22	29	56	15	0	1
57733	1	65	0	0	175	72.4	23.64	2	1	1	0	1	138	75	88	15.1	6.91	7.51	1	1.25	4.68	23	23	61	123	0	1
57765	1	51	0	0	171	78.3	26.78	3	1	1	0	0	131	82	78880400000000	5.2	1.96	5.5	0	1.84	2.15	24	22	98	50	0	1
57766	0	50	0	0	158.5	52.1	20.74	2	0	0	0	1	120	78	77	5.7	1.61	5.89	0	2.03	2.3	21	17	56	15	0	1
57783	1	24	0	0	171.5	55	18.7	2	1	0	0	0	131	82	101	5.3	1.38	4.39	0	1.43	2.17	47	66	60	18	0	1
57797	0	38	0	0	164.5	68.4	25.28	3	0	0	0	1	100	70	61	6	1.43	6.2	1	1.66	3.7	26	16	46	11	0	1
58009	1	40	1	1	158.5	66.2	26.35	3	1	1	0	0	146	96	59	5.1	2.46	5.58	0	1.21	3.15	20	25	71	22	0	1
58018	1	36	0	0	171	59.6	20.38	2	0	0	0	0	100	72	74	4.8	0.49	5.91	0	1.91	3.05	32	42	74	20	0	1
58145	0	44	0	0	160	53	20.7	2	0	0	0	0	100	70	80	4.6	1.12	5.1	0	1.73	2.76	19	12	60	5	0	1
58177	1	40	0	0	171.5	68.6	23.32	2	1	1	0	1	125	85	73	5.9	1.81	6.6	1	1.76	3.73	21	19	90	26	0	1
57399	0	32	0	0	163	52	19.57	2	0	0	0	0	100	70	83	5.1	0.66	4.09	0	2.11	1.58	22	20	53	23	0	1
57442	0	47	1	1	156	56	23.01	2	1	1	0	0	146	96	84	5.5	2.55	4.48	0	1.33	2.62	14	12	74	14	0	1
57467	1	48	1	1	176.5	77.6	24.91	2	0	1	0	1	118	76	82	5.6	1.8	4.51	0	1.44	2.89	27	30	107	45	0	1
58693	0	39	0	0	155	61.1	25.43	3	0	0	1	0	100	70	72	4.9	1.22	4.09	0	1.16	2.08	18	16	71	15	0	1
58793	0	59	1	1	157	63.6	25.8	3	1	0	1	1	160	100	72	5.7	1.1	4.55	0	1.24	2.48	28	20	73	46	0	1
58842	0	34	1	1	160	68.6	26.8	3	0	0	1	0	120	80	78	5.1	1.14	5.24	0	1.28	3.07	17	36	76	26	0	1
58861	1	35	0	0	178.5	68.4	21.47	2	1	0	0	0	134	77	80	5.2	0.62	4	0	1.27	1.95	21	24	65	11	0	1
57737	1	49	0	0	170	76.2	26.37	3	1	1	1	1	140	98	92	7.1	2.49	4.56	0	1.02	2.14	19	22	80	26	0	1
57744	1	39	0	0	176	70.4	22.73	2	0	0	0	0	106	67	69	4.5	1.03	7.07	1	1.59	4.05	53	27	53	15	0	1
57794	1	41	1	2	164	81	30.12	4	1	1	0	1	121	88	69	6.3	6.12	8.71	1	1.59	4.46	32	55	30	39	0	1
57844	1	41	0	0	169	71.6	25.07	3	0	0	0	1	117	67	68	5.9	1.17	4.93	0	1.53	2.11	24	35	56	13	0	1
57869	0	55	0	0	161	53.1	20.49	2	0	0	0	1	112	74	81	6.2	0.7	4.64	0	1.73	1.97	22	22	53	12	0	1
58041	1	42	0	0	174	65.8	21.73	2	0	1	0	0	106	72	68	5.5	2.46	6.32	1	1.45	3.87	48	78	73	116	0	1
58141	1	26	0	0	170	64.1	22.18	2	1	0	0	0	124	85	83	5.3	0.79	3.84	0	1.1	2	23	34	50	18	0	1
58324	1	37	0	0	173	71	23.72	2	0	1	0	0	119	75	75	5	1.83	7.01	1	1.62	4.39	21	25	72	27	0	1
58326	0	60	0	0	148.5	49	22.22	2	0	1	0	0	110	76	75	5.1	1.98	7.68	1	1.52	5.02	33	53	153	85	0	1
58338	1	28	0	0	171.5	75.5	25.67	3	0	0	0	0	123	73	74	5.1	1.56	4.94	0	1.57	2.45	32	46	57	27	0	1
58372	1	43	0	0	172	71.6	24.2	2	0	0	1	0	120	76	79	5.3	1.23	4.15	0	0.94	2.48	25	19	54	22	0	1
58395	0	41	0	0	156	59.8	24.57	2	0	0	0	1	100	72	70	5.9	1.27	5.79	0	1.42	3.85	17	11	66	10	0	1
58661	1	46	0	0	162	66.7	25.42	3	1	1	0	0	140	96	74	5.1	3.32	5.57	0	1.29	3.16	21	45	76	86	0	1
58300	0	58	0	0	148	52.9	24.15	2	0	0	0	0	110	70	74	5.3	0.59	5.17	0	1.87	2.5	26	23	49	13	0	1
58317	1	50	0	0	173	76.2	25.46	3	0	0	0	0	103	61	78	5	1.21	6.26	1	1.37	4.49	21	16	76	30	0	1
58467	0	48	0	0	145.5	50.1	23.67	2	1	0	0	0	146	86	61	5.4	1.63	5.2	0	1.82	2.4	21	16	85	13	0	1
58532	1	42	0	0	171	66.4	22.71	2	0	1	0	0	116	81	69	5.5	1.9	4.8	0	1.11	2.69	21	22	74	39	0	1
58632	1	46	0	0	176	79.4	25.63	3	0	0	0	0	115	69	74	5.3	1	3.6	0	1.5	1.53	55	103	134	83	0	1
56697	1	52	1	1	171	78.3	26.78	3	1	0	0	1	137	86	76	5.7	1.43	4.7	0	1.72	2.61	26	18	74	34	0	1
56711	1	29	1	1	169	82.2	28.78	3	0	1	0	0	129	81	83	5.2	3.57	5.36	0	1.26	3.38	21	32	111	56	0	1
56911	1	23	0	0	183.5	73.2	21.74	2	0	0	0	0	127	62	92	5.3	1	3	0	1.89	0.85	24	24	53	16	0	1
56912	1	27	0	0	171	65	22.23	2	0	0	0	0	120	71	69	5.1	1.16	4.8	0	1.91	2.65	25	22	56	18	0	1
56929	0	27	0	0	159	54	21.36	2	0	0	0	0	106	74	76	5.3	0.73	3.84	0	1.78	1.72	13	9	43	9	0	1
58010	1	34	0	0	172	77	26.03	3	0	1	0	0	118	80	66	4.9	2.04	4.14	0	1.06	2.18	14	16	52	10	0	1
58110	0	53	1	2	162	74	28.2	3	1	1	0	0	140	96	79	5.2	2.51	6.54	1	1.43	4.04	25	31	64	30	0	1
58153	0	41	0	0	161	53.2	20.52	2	0	0	0	0	120	80	78	4.9	0.67	5.79	0	2.31	3.05	18	12	48	12	0	1
57772	0	49	0	0	160	57.6	22.5	2	1	0	0	1	130	80	66	5.8	1.07	5.62	0	1.5	3.45	30	25	46	24	0	1
57925	1	30	1	1	171.5	94.8	32.23	4	1	1	1	0	134	86	73	5.3	2.94	4.87	0	1.04	2.65	20	38	65	44	0	1
57972	1	46	0	0	173.5	72.7	24.15	2	0	0	0	0	119	75	65	5.4	1.45	5.31	0	1.39	3.19	22	23	77	18	0	1
57974	1	60	1	2	166	75	27.22	3	1	1	0	1	148	79	69	5.9	2.37	5.9	0	1.12	3.99	24	47	53	40	0	1
58006	0	51	0	0	161	59.8	23.07	2	0	0	0	0	120	80	99	5.5	1.58	3.93	0	1.39	1.73	16	14	92	11	1	2
58023	1	40	1	1	171	77.9	26.64	3	0	1	1	0	123	72	71	5.3	3.62	3.98	0	0.99	1.83	21	23	69	20	0	1
57503	1	34	0	0	177	72.8	23.24	2	1	0	0	0	135	83	79	4.9	1.52	5.52	0	1.79	3	18	20	77	21	1	2
57542	1	29	0	0	173	68.4	22.85	2	0	1	0	0	123	70	69	5.1	1.83	5.48	0	1.41	3.3	25	36	65	63	0	1
57592	1	46	1	1	174	81.2	26.82	3	0	1	0	1	105	72	68	7.9	3.93	5.7	0	1.2	3.27	14	28	73	49	0	1
57970	1	21	0	0	166	57.6	20.9	2	1	0	0	0	131	81	61	4.9	0.9	5.2	0	1.26	3.3	17	15	60	17	0	1
57993	1	48	1	1	171.5	81.3	27.64	3	0	1	1	0	121	67	81	5.3	3.98	4.82	0	0.93	3.12	38	86	72	49	0	1
57995	1	58	0	0	172.5	77.9	26.18	3	0	1	0	1	114	74	70	7.2	2.1	5.68	0	1.4	3.54	20	24	94	36	0	1
58002	1	58	0	0	175	76.7	25.04	3	1	0	1	0	141	82	59	5.4	1.57	4.41	0	0.89	2.74	27	31	91	15	0	1
58095	0	62	0	0	156	57.8	23.75	2	0	0	0	1	120	84	75	6.3	1.23	4.78	0	1.42	2.6	42	46	100	49	0	1
58138	1	33	1	1	173	85	28.4	3	1	1	1	0	128	90	84	4.4	2.42	4.38	0	0.95	2.68	16	16	59	23	0	1
58220	1	61	1	1	167.5	63	22.45	2	0	1	0	1	111	71	84	5.7	2.39	6.07	1	1.56	2.98	19	29	68	30	0	1
58254	0	50	0	0	163	57	21.45	2	0	1	1	0	126	80	66	4.9	2.88	3.82	0	1.02	2.03	18	12	48	18	0	1
58279	1	34	1	1	176	91	29.38	3	1	1	0	1	154	88	69	6.3	1.72	5.74	0	1.11	4.18	19	25	79	35	1	2
58322	1	34	0	0	166	63.4	23.01	2	1	0	0	0	131	85	84	5	1.25	4.94	0	1.25	2.76	24	20	69	36	0	1
58354	1	33	0	0	172.5	64.1	21.54	2	0	0	0	0	115	60	83	5	0.92	3.5	0	1.13	1.7	22	21	72	18	0	1
58910	0	24	0	0	157	50.2	20.37	2	0	0	0	0	120	80	104	5.4	1.02	3.65	0	1.56	1.53	23	19	56	11	0	1
59144	0	58	0	0	151	59	25.88	3	1	1	0	1	140	90	84	5.9	1.94	5.11	0	1.59	2.36	24	24	81	15	0	1
60846	1	62	0	0	180	80	24.69	2	0	0	0	0	126	73	74	4.7	1.12	5.47	0	1.43	3.34	25	19	67	34	0	1
60863	1	58	0	0	190	97.2	26.93	3	1	0	0	1	153	93	70	7.6	1.21	5.74	0	1.33	3.52	16	21	78	15	0	1
53932	1	50	0	0	166.5	63.3	22.83	2	0	0	0	0	123	78	78	4.7	1.09	5.26	0	1.41	3.18	36	43	67	19	0	1
56540	0	33	0	0	162	53.8	20.5	2	0	0	0	0	100	70	72	5.1	0.66	4.98	0	1.8	2.3	15	9	38	11	0	1
56715	1	28	0	0	170.5	72	24.77	2	1	1	0	0	125	85	99	4.8	2.76	5.73	0	1.55	3.76	17	25	72	28	0	1
56733	0	27	0	0	159.5	46.1	18.12	1	0	0	0	0	100	70	78	5	0.53	4.68	0	2.35	2.01	20	15	55	10	0	1
56890	0	31	1	2	153	61	26.06	3	0	1	0	0	124	84	72	5.4	1.79	4.67	0	1.48	2.57	51	108	99	58	0	1
58407	0	37	0	0	160	55.4	21.64	2	0	0	0	0	120	80	86	4.4	1.02	4.48	0	1.3	2.38	22	19	41	17	0	1
58409	0	56	1	1	166	82.2	29.83	3	0	0	0	1	120	80	76	5.6	1.45	5.47	0	1.47	3.4	22	22	64	14	0	1
58660	0	44	0	0	159	58	22.94	2	0	0	0	0	106	74	86	5.4	0.74	5.18	0	1.69	2.67	16	11	51	13	0	1
58775	1	52	1	1	168.5	85.4	30.08	4	1	1	1	0	133	89	90	4.9	1.74	3.38	0	0.91	1.55	21	22	74	25	0	1
57815	0	29	0	0	157.5	56.8	22.9	2	0	0	0	1	100	66	86	5.8	1.47	4.21	0	1.37	2.12	23	8	48	20	0	1
57880	1	47	0	0	167.5	82.2	29.3	3	1	1	0	1	145	84	78	6.4	3.34	4.96	0	1.14	2.85	49	91	103	157	0	1
57947	1	51	0	0	169.5	69.8	24.29	2	1	1	0	0	153	89	72	5.2	1.76	5.4	0	1.37	3.22	16	21	71	92	0	1
57966	0	28	0	0	165	57	20.94	2	0	0	0	0	100	70	82	5.4	0.69	4.51	0	1.4	2.52	27	34	60	11	0	1
57983	0	63	0	0	154.5	59.4	24.88	2	1	0	0	1	160	100	73	6.7	1.44	6.32	1	1.6	4.03	23	17	73	17	0	1
57951	0	33	0	0	160	53.8	21.02	2	0	0	0	0	100	70	71	4.7	1.18	3.67	0	1.44	1.34	21	17	48	14	0	1
58026	0	51	0	0	149.5	55.4	24.79	2	0	0	0	0	100	70	80	5.1	1.15	5.97	0	1.55	3.63	50	43	103	85	0	1
58105	0	34	0	0	162	62.3	23.74	2	0	1	0	0	100	70	78	5.2	1.88	4.31	0	1.38	1.97	26	24	42	12	0	1
58144	1	33	0	0	164	58	21.56	2	0	0	0	0	102	61	66	4.6	1.05	5.38	0	1.51	2.93	24	25	68	72	0	1
58205	0	55	0	0	167	69	24.74	2	0	0	0	1	100	70	74	6.4	1.53	7	1	1.61	4.21	20	25	55	12	0	1
58838	1	46	1	1	168	92.7	32.84	4	0	0	0	0	126	79	101	5.4	0.9	4.44	0	1.33	2.16	91	171	78	186	0	1
58840	1	43	1	1	170	81.9	28.34	3	0	1	0	0	108	75	72	5.3	3.07	6.53	1	1.45	3.82	28	43	85	41	0	1
58906	1	40	0	0	173	63.3	21.15	2	0	0	0	0	107	67	68	4.7	1.2	4.92	0	1.28	2.74	19	16	45	13	0	1
59129	1	50	1	1	168.5	80.1	28.21	3	1	1	0	1	138	86	71	6.5	10.03	8.4	1	1.57	4.15	32	57	91	82	1	2
60969	1	41	0	0	166.5	76.1	27.45	3	1	0	1	0	131	70	69	5.1	1.39	2.66	0	1	1.07	24	35	45	17	0	1
58699	1	46	1	1	174	83.7	27.65	3	1	0	0	0	149	102	84	5.2	1.16	4.52	0	1.19	2.39	16	18	84	29	0	1
58732	0	39	0	0	164	55.8	20.75	2	0	0	0	0	100	70	76	5.2	0.56	3.68	0	1.36	1.63	18	15	49	14	0	1
58835	1	27	0	0	176	64	20.66	2	1	1	0	0	134	80	81	5.2	1.83	5.29	0	1.17	2.87	15	17	79	23	0	1
58850	1	47	0	0	165	78.3	28.76	3	1	1	0	1	158	110	96	7	2.08	4.74	0	1.3	2.49	21	25	68	41	0	1
58228	1	42	1	1	179	87	27.15	3	1	1	0	1	163	114	77	5.8	3.06	4.97	0	1.54	2.39	21	30	58	63	0	1
58235	1	53	1	1	169.5	76.8	26.73	3	1	1	0	0	163	100	87	5.5	2.3	4.62	0	1.24	2.31	21	24	101	23	1	2
58303	0	49	0	0	158.5	64.6	25.71	3	0	0	1	0	110	80	69	4.5	1.46	4.37	0	1.11	2.45	42	72	65	15	0	1
58328	1	44	0	0	166	60.2	21.85	2	0	0	0	0	107	71	67	5.2	1.02	4.86	0	1.51	2.65	29	26	55	40	0	1
58353	1	44	0	0	171	71.4	24.42	2	0	1	0	0	123	79	67	5.1	3.7	6.87	1	1.56	4.19	23	30	56	30	0	1
57953	1	41	1	1	170	81.3	28.13	3	1	1	0	1	161	104	80	6.3	3.48	5.74	0	1.52	3.02	75	89	79	674	0	1
57996	0	54	0	0	159	63	24.92	2	1	0	0	0	130	80	74	5.3	1.17	6.58	1	1.58	3.99	18	21	64	13	0	1
58021	1	54	0	0	168.5	72.4	25.5	3	1	0	0	1	137	87	79	17.2	1.32	5.86	0	1.28	3.87	20	27	73	18	0	1
58146	0	46	1	1	163	56.6	21.3	2	0	1	1	0	120	80	81	5.5	1.91	4.59	0	1.2	2.4	13	12	72	20	0	1
58302	0	48	0	0	152	52.3	22.64	2	1	0	0	0	144	96	93	4.8	1.17	4.81	0	1.75	2.03	17	15	52	17	1	2
58304	0	52	0	0	148	59.8	27.3	3	1	0	1	0	146	94	100	5.4	0.51	3.75	0	1.27	1.81	24	17	91	10	0	1
58361	1	19	0	0	174	63	20.81	2	0	0	0	0	115	83	118	5.2	1.5	4.83	0	1.15	2.87	19	16	77	19	0	1
58363	1	51	1	1	178.5	90.1	28.28	3	0	1	1	1	108	76	89	5.9	1.97	4.75	0	1	2.97	30	38	59	28	0	1
58042	1	23	0	0	175	57.8	18.87	2	1	0	0	0	130	69	74	4.8	0.59	3.39	0	1.22	1.61	56	169	92	26	0	1
58172	0	49	0	0	157	70.8	28.72	3	1	1	0	1	130	84	86	6.4	4.29	7.17	1	1.61	3.93	22	26	134	18	0	1
58191	0	48	0	0	157.5	63.2	25.48	3	0	0	0	1	110	80	72	5.7	0.44	4.9	0	1.82	2.37	22	21	47	7	0	1
58289	0	43	0	0	162	64.7	24.65	2	0	0	0	0	120	80	67	5.2	1.55	5.54	0	1.85	2.71	50	83	76	83	0	1
55660	1	36	0	0	169.5	65.9	22.94	2	1	1	0	0	137	76	89	4.6	2.28	4.9	0	1.14	2.75	18	28	76	18	0	1
56763	0	23	0	0	157	44	17.85	1	0	0	0	0	104	72	70	4.7	0.52	3.58	0	1.5	1.74	18	6	38	14	0	1
56777	0	34	0	0	166	51.6	18.73	2	0	0	0	0	96	68	72	4.9	0.63	4.55	0	2.03	2.33	19	14	37	11	0	1
56778	0	33	0	0	165	60.2	22.11	2	0	0	0	0	120	80	77	5.4	1	4.41	0	2.12	1.84	14	9	40	14	0	1
56913	0	26	0	0	169	76.8	26.89	3	0	0	0	0	100	70	74	5.3	0.82	4.71	0	1.81	2.71	18	16	46	14	0	1
58785	1	24	0	0	171.5	62.6	21.28	2	0	0	0	1	128	79	90	5.6	1.15	4.68	0	1.41	2.29	30	21	57	16	0	1
58849	1	50	1	1	173	77.6	25.93	3	0	1	0	1	129	84	90	14.2	2.76	6.64	1	1.53	3.96	44	60	105	359	0	1
59003	1	59	0	0	171.5	81.8	27.81	3	1	0	0	1	142	84	81	5.7	1.51	4.42	0	1.18	2.5	25	27	57	26	0	1
59035	0	55	1	1	159.5	60.8	23.9	2	1	0	0	0	144	90	73	4.8	1.59	5.63	0	1.85	3.22	21	21	58	22	0	1
59053	0	29	0	0	155.5	63.2	26.14	3	0	1	1	0	100	70	68	4.9	2.77	3.34	0	1.17	1.2	35	46	81	20	1	2
52431	1	31	0	0	167.5	68.7	24.49	2	0	0	0	1	124	74	81	5.6	1.47	3.94	0	1.36	2.09	23	24	62	16	0	1
56784	0	30	0	0	158	54.7	21.91	2	0	0	0	1	100	70	76	5.6	0.48	4.82	0	2	2.23	20	17	37	11	0	1
56909	0	32	0	0	152.5	55.6	23.91	2	0	0	0	0	100	70	63	5	1.36	3.82	0	1.61	1.83	24	31	59	14	0	1
58777	1	29	1	2	174.5	97.4	31.99	4	1	1	1	0	133	92	101	5.4	3.3	5.91	0	1.02	3.47	16	46	107	73	0	1
58824	1	23	0	0	175	83.3	27.2	3	0	0	0	0	124	69	70	5.2	0.72	4.63	0	1.32	2.4	21	20	64	16	0	1
59075	0	49	0	0	163.5	54.4	20.35	2	1	0	0	1	138	80	64	5.9	1.5	7.31	1	1.78	4.37	15	13	35	20	0	1
60882	1	56	0	0	168.5	77.2	27.19	3	0	0	0	0	128	78	61	4.9	0.78	4.67	0	1.22	2.85	13	26	54	51	1	2
60914	1	43	0	0	179	64.3	20.07	2	0	0	0	0	107	61	60	4.9	0.62	3.78	0	1.42	1.93	34	49	73	15	0	1
60933	0	42	0	0	156	49.7	20.42	2	0	0	0	0	100	70	65	4.4	0.36	3.77	0	1.52	1.65	50	61	38	55	0	1
60965	1	44	0	0	173	66	22.05	2	0	0	0	0	115	75	93	5	1.04	4.43	0	1.21	2.38	17	25	61	25	0	1
60999	1	40	0	0	170	77.2	26.71	3	0	1	0	0	105	70	78	4.7	9.06	5.99	0	1.2	2.19	54	94	66	201	0	1
61016	1	42	1	1	174	77	25.43	3	0	1	0	0	104	66	73	5.5	1.98	4.19	0	1.7	1.93	24	28	89	34	0	1
58084	0	37	0	0	162	56	21.34	2	0	0	0	0	100	70	75	5.5	0.67	5	0	1.56	2.56	22	20	52	61	0	1
58151	0	30	1	1	154	59.4	25.05	3	0	0	0	0	100	70	78	5.2	1.07	4.51	0	1.42	2.35	12	13	50	14	0	1
58333	1	53	1	1	163.5	70.2	26.26	3	1	0	0	1	156	105	75	5.8	1.19	5.12	0	1.28	3.39	22	20	102	54	1	2
58178	1	48	0	0	170.5	57.2	19.68	2	0	0	0	1	110	78	68	6.4	1.44	5.71	0	2.02	2.69	24	16	53	40	0	1
58210	0	52	0	0	155	63.9	26.6	3	1	0	0	1	150	90	65	6.4	1.22	7.08	1	1.69	4.25	24	25	53	14	0	1
58335	0	47	0	0	160	54	21.09	2	0	0	0	0	100	70	60	5.1	1.35	4.52	0	1.33	2.49	21	17	51	16	0	1
58339	1	44	1	2	167	86	30.84	4	1	1	0	1	120	85	71	7.4	3.53	7.8	1	1.5	5.68	44	64	70	108	1	2
58364	0	22	0	0	164	65	24.17	2	0	0	0	0	100	70	72	5.4	0.76	4.85	0	1.58	2.47	19	12	51	12	0	1
58903	1	44	0	0	171	69	23.6	2	0	0	0	1	109	69	71	5.6	1.35	5.35	0	1.33	3.09	24	28	52	29	0	1
58330	1	47	0	0	174	74.1	24.47	2	0	0	0	0	112	63	68	4.4	0.86	4.73	0	1.13	3.09	21	36	51	16	0	1
58362	0	56	0	0	165	69.7	25.6	3	1	1	1	1	150	100	76	5.7	2.4	7.23	1	1.27	5.54	29	26	83	13	0	1
58369	0	55	0	0	154	58.8	24.79	2	1	0	0	1	142	86	74	7.7	0.88	6.3	1	2.1	2.99	1540	1109	171	510	0	1
58605	1	45	1	1	171.5	72.6	24.68	2	1	1	0	1	120	86	74	5.8	4.01	6.05	1	1.39	3.29	27	36	73	117	0	1
58637	0	52	0	0	157	54	21.91	2	0	0	0	0	102	70	58	5.3	0.74	4.52	0	1.64	2.03	16	13	81	8	0	1
61144	1	56	0	0	172.5	74.8	25.14	3	0	0	0	0	109	66	73	4.9	0.78	5	0	1.44	3.06	18	18	59	50	0	1
61176	1	59	1	1	176.5	82.3	26.42	3	0	1	0	0	114	68	78	5.3	4.23	3.88	0	1.24	1.64	30	39	78	22	0	1
61203	1	48	0	0	163	54.7	20.59	2	0	0	0	0	119	67	86	4.8	0.86	5.82	0	1.91	3.14	30	32	70	21	0	1
58464	1	48	1	1	174	88	29.07	3	0	1	1	0	108	62	60	4.8	2.61	4.96	0	0.94	2.75	21	37	69	36	0	1
58528	1	47	1	1	163.5	70.7	26.45	3	0	1	0	1	107	68	65	6.8	4.14	4.31	0	1.09	1.69	16	18	59	57	0	1
58603	1	41	0	0	171.5	75.7	25.74	3	1	0	0	0	138	85	92	4.7	0.9	4.7	0	1.63	2.18	21	18	59	42	1	2
58678	0	52	0	0	156	59	24.24	2	0	0	0	0	110	80	64	5.2	0.8	3.85	0	1.68	1.41	28	17	80	39	0	1
58604	0	23	0	0	158	48.1	19.27	2	0	0	1	0	100	70	76	5.4	0.66	3.74	0	1.16	1.82	17	12	47	11	0	1
58606	0	45	0	0	160	68.6	26.8	3	0	0	1	0	120	80	82	5.3	1.06	3.83	0	1.28	1.76	27	24	44	13	0	1
58638	1	42	0	0	166.5	63.8	23.01	2	0	0	0	0	119	77	69	4.9	0.84	4.05	0	1.11	2.14	30	37	60	16	0	1
58670	1	31	0	0	179	81	25.28	3	0	0	0	0	129	77	61	5.1	1.12	7	1	1.49	4.53	38	94	80	26	0	1
59117	1	45	0	0	187.5	93	26.45	3	1	0	0	0	150	98	74	4.9	1.56	6.17	1	1.24	3.92	18	17	58	21	0	1
60872	1	47	1	1	170	71.2	24.64	2	0	1	0	0	108	73	82	4.7	2.1	4.89	0	1.44	2.62	27	46	51	57	0	1
60975	1	41	0	0	165	56	20.57	2	0	0	0	0	107	64	84	4.6	0.91	5.28	0	1.54	3.05	24	25	59	18	0	1
58323	1	30	1	1	165.5	68.4	24.97	2	1	0	0	1	137	92	84	5.6	0.94	5.35	0	1.51	3.32	27	23	55	31	0	1
58325	0	30	0	0	160	52.3	20.43	2	0	0	0	0	100	70	80	4.9	1.39	5.71	0	1.67	3.26	23	14	37	10	0	1
58406	1	48	0	0	175	69	22.53	2	1	0	0	0	134	79	82	4.2	1.63	4.47	0	1.25	2.68	18	12	81	23	0	1
58644	1	44	1	1	170.5	94	32.34	4	0	0	0	0	124	77	66	4.8	0.97	4.61	0	1.34	2.32	23	27	76	20	0	1
60864	0	51	0	0	166.5	61.2	22.08	2	0	0	0	1	100	70	72	6.3	1.03	4.78	0	1.31	2.68	25	23	57	37	0	1
60898	0	53	0	0	158.5	54.6	21.73	2	0	0	0	0	116	78	74	5	1.04	5.73	0	1.78	3.33	23	27	65	11	0	1
60932	0	42	0	0	156	53.8	22.11	2	1	0	0	0	144	100	74	4.6	0.59	4.83	0	1.81	2.42	16	7	40	12	0	1
60981	1	42	1	1	170	76.3	26.4	3	1	1	0	0	164	102	60	5.3	3.38	5.06	0	1.3	2.84	28	38	66	121	0	1
60983	0	39	0	0	162.5	64.5	24.43	2	0	0	0	0	120	80	71	4.8	0.66	5.64	0	1.61	3.03	13	10	57	10	0	1
58548	1	59	0	0	170	77.2	26.71	3	0	0	0	0	123	80	80	5.4	0.9	4.63	0	1.3	2.53	26	23	96	58	0	1
52417	1	28	0	0	166.5	53.9	19.44	2	0	0	0	0	122	70	70	5	1.03	4.97	0	1.71	2.09	21	19	65	22	0	1
52435	1	29	1	1	179.5	83.2	25.82	3	0	0	0	0	125	77	66	4.8	0.76	4.31	0	1.41	2.45	19	30	75	23	0	1
61080	1	55	1	1	169.5	84.5	29.41	3	1	1	0	0	145	102	92	5.4	3.39	5.8	0	1.62	2.81	21	38	78	40	0	1
61084	1	43	0	0	176.5	74.1	23.79	2	1	1	0	0	137	79	74	4.7	2.49	5.22	0	1.3	3.31	23	23	99	33	0	1
61114	1	45	0	0	175	74.2	24.23	2	0	0	0	1	129	77	66	5.8	1.17	4.92	0	1.47	2.74	18	24	51	19	0	1
61116	1	53	0	0	177.5	71.2	22.6	2	0	1	0	0	122	74	90	5.3	2.64	5.31	0	1.16	2.63	20	15	37	16	0	1
61197	1	56	0	0	165	69	25.34	3	0	0	0	1	118	77	67	13.1	1.03	3.64	0	1.16	1.97	13	20	89	24	0	1
61201	1	52	1	1	171	81.6	27.91	3	0	1	0	0	117	76	74	5.5	2	4.5	0	1.25	2.7	30	31	79	54	0	1
58414	0	40	0	0	156	60	24.65	2	0	0	0	0	114	76	73	4.8	0.88	4.55	0	1.49	2.24	21	11	47	10	0	1
58421	0	26	0	0	155.5	51.6	21.34	2	0	0	0	0	110	70	84	4.8	0.81	4.88	0	1.43	2.77	24	37	74	19	0	1
61269	1	40	0	0	178	80.1	25.28	3	0	1	0	0	108	61	76	5	3.11	6.31	1	1.15	4.21	25	39	98	43	0	1
61271	1	40	0	0	178.5	81.3	25.52	3	0	0	0	0	104	62	69	5.5	0.92	4.39	0	1.53	2.23	16	16	70	17	0	1
61303	1	41	1	1	169	90.6	31.72	4	1	1	0	0	137	79	120	5	4.52	5.67	0	1.19	3.15	20	35	49	68	0	1
61305	0	41	0	0	161	47.7	18.4	1	0	0	0	0	120	80	73	5.3	1.37	4.3	0	1.3	1.94	14	19	60	16	0	1
58846	0	37	0	0	165	66.8	24.54	2	0	0	0	0	110	76	72	4.7	0.98	6.36	1	1.94	3.49	14	16	63	17	0	1
58932	1	39	0	0	172.5	66.2	22.25	2	0	0	0	0	108	66	73	4.9	0.57	4.78	0	2.06	2.11	18	19	45	15	0	1
58957	0	45	0	0	161	52	20.06	2	0	1	0	0	100	70	70	4.8	2.03	4.69	0	1.34	2.2	18	16	50	13	0	1
59146	1	42	0	0	164	60.6	22.53	2	0	0	0	0	111	60	72	4.8	0.67	3.57	0	1.39	1.54	20	16	50	13	0	1
60861	0	55	0	0	160	52.1	20.35	2	0	0	0	0	116	76	69	4.3	0.64	5.57	0	1.92	2.74	25	19	93	41	1	2
58680	1	54	0	0	188	80.5	22.78	2	0	1	0	0	123	73	79	5.4	2.23	5.58	0	1.68	2.88	20	12	93	46	0	1
58823	0	48	0	0	158	63.2	25.32	3	0	0	0	0	110	80	76	5.4	1.58	4.94	0	1.51	2.34	17	22	63	38	0	1
58930	1	50	0	0	171.5	80.4	27.34	3	1	0	0	0	148	107	87	4.2	1.51	5.71	0	1.53	3.18	25	27	68	30	0	1
59005	1	43	1	1	170	85	29.41	3	0	0	0	0	111	74	64	5.2	0.72	3.78	0	1.2	2.05	28	35	40	32	0	1
59023	1	41	0	0	186.5	79.4	22.83	2	0	0	0	0	109	63	67	4.4	1.13	4.78	0	1.87	2.38	21	29	87	14	0	1
59087	0	39	0	0	162.5	64.1	24.27	2	0	0	0	0	120	80	78	5.5	1.5	5.47	0	1.41	3.04	18	18	71	15	0	1
58931	1	49	0	0	173.5	62.4	20.73	2	0	0	0	0	115	68	77	4.8	1.23	5.4	0	1.31	3.21	32	50	74	23	0	1
59006	1	48	1	2	174	84.3	27.84	3	1	1	1	0	138	84	65	4.5	3.56	5.42	0	1	3.22	14	18	79	14	0	1
59065	0	24	0	0	154.5	46.8	19.61	2	0	0	0	0	106	70	76	4.9	0.82	5.05	0	1.58	2.9	16	11	54	12	0	1
60875	1	47	0	0	179	79.2	24.72	2	1	0	0	1	146	94	76	6.7	0.97	4.98	0	1.22	3.07	15	22	70	15	0	1
60922	0	39	0	0	169	64	22.41	2	0	0	0	0	116	80	106	4.4	0.63	5.25	0	1.45	3.02	21	18	58	13	0	1
60957	1	47	0	0	172.5	79.8	26.82	3	1	1	0	0	142	97	78	4.7	1.79	6.49	1	1.49	4.2	25	29	43	46	0	1
60972	1	42	0	0	173	81	27.06	3	1	1	0	0	120	92	89	5.3	4.48	8.19	1	1.77	5.27	43	65	118	236	0	1
61022	0	40	0	0	165	60	22.04	2	0	0	0	0	96	64	78	3.9	0.69	4.79	0	1.54	2.1	10	9	85	13	0	1
61058	1	47	0	0	176	82.8	26.73	3	1	1	1	1	125	87	75	8.9	2.68	3.84	0	1.04	1.81	21	34	94	24	0	1
61107	1	55	0	0	162	71.7	27.32	3	1	1	0	0	130	87	63	4.7	3.03	5.52	0	1.38	3.05	24	33	66	67	0	1
61040	0	42	0	0	164	66.2	24.61	2	0	0	0	0	120	80	71	5.4	0.99	6.01	1	1.45	3.71	24	30	67	13	0	1
61089	1	54	1	1	175.5	73.2	23.77	2	0	1	0	1	128	77	79	5.8	3.63	6.65	1	1.31	4.26	26	42	67	28	0	1
61172	1	47	0	0	173.5	90.2	29.96	3	1	0	1	0	130	83	69	5.2	1.28	2.87	0	0.96	1.42	16	20	89	14	0	1
61226	1	40	1	2	163	72	27.1	3	1	1	0	0	129	95	85	5.3	4.32	5.37	0	1.35	2.71	35	65	64	38	0	1
61307	1	42	0	0	168	67.1	23.77	2	0	0	0	0	120	75	75	5.4	0.88	5.13	0	1.42	2.9	19	12	59	13	0	1
61343	1	43	1	1	175	76.3	24.91	2	0	0	0	0	115	75	75	4.9	1.02	4.85	0	1.23	2.76	20	25	55	27	0	1
59002	0	60	0	0	159	65.2	25.79	3	0	0	0	1	128	76	63	5.6	1.25	5.34	0	1.56	3.12	16	12	91	16	0	1
59019	1	56	1	1	170.5	74.7	25.7	3	1	1	0	0	147	79	68	4.8	2.71	6.05	1	1.43	3.8	22	32	83	62	0	1
60924	0	43	0	0	164.5	58	21.43	2	0	0	0	0	120	76	70	4.8	0.66	4.6	0	1.57	2.22	13	12	53	12	0	1
60956	1	56	0	0	166.5	62.3	22.47	2	0	0	0	0	118	73	88	5.4	0.68	5.29	0	1.82	2.59	30	36	34	14	0	1
61064	1	40	1	2	178	97.3	30.71	4	1	1	0	0	140	77	76	4.6	3.81	6.09	1	1.32	3.73	27	67	27	70	0	1
61081	1	59	0	0	165	69	25.34	3	0	0	0	0	120	68	85	5.3	1.4	5.07	0	1.15	3.21	21	34	76	45	0	1
61134	1	53	0	0	182.5	89.7	26.93	3	1	1	0	1	149	85	87	14.9	5.34	5.43	0	1.37	2.68	21	28	76	31	0	1
61181	1	56	1	1	170	77.5	26.82	3	0	1	0	1	112	70	71	11.2	1.71	6.03	1	1.22	3.94	15	36	54	20	1	2
61217	1	41	0	0	170	71.6	24.78	2	0	0	0	0	105	67	66	4.8	1.17	4.98	0	1.23	3.06	25	23	58	18	0	1
61266	1	40	0	0	178	74.4	23.48	2	0	0	0	1	128	77	69	6.2	1.17	4.33	0	1.81	2	24	39	85	36	0	1
56901	1	26	0	0	176	82.3	26.57	3	1	1	0	1	122	87	85	6.2	1.8	4.87	0	1.74	2.79	17	16	65	18	0	1
56908	0	25	0	0	163	52.7	19.84	2	0	0	0	0	100	70	93	5.2	1.55	4.91	0	2.39	2.08	27	29	40	9	0	1
56926	0	50	0	0	163	56.6	21.3	2	1	0	0	1	130	86	75	5.7	1.37	5.07	0	2.22	2.67	23	17	53	13	0	1
57244	1	27	0	0	177	80.8	25.79	3	1	1	0	0	142	86	91	4.9	1.81	5.14	0	1.73	3.03	40	47	69	25	0	1
57276	1	28	0	0	174.5	76.6	25.16	3	0	1	0	0	127	77	88	5.3	3.35	4.93	0	1.72	2.58	22	28	71	97	0	1
57351	1	21	0	0	167	57	20.44	2	0	0	0	0	104	68	90	5.3	0.37	4.4	0	1.79	2.32	20	16	48	24	0	1
58744	0	32	0	0	163	52.3	19.68	2	0	0	0	0	100	70	81	5.1	1.53	5.57	0	1.62	3.05	39	100	88	46	0	1
58761	0	52	0	0	153.5	42.1	17.87	1	0	0	0	0	90	60	109	5	1.19	4.4	0	2.42	1.3	30	27	90	112	0	1
58876	0	22	0	0	154	50.9	21.46	2	0	0	0	0	110	80	78	5.5	0.65	4.38	0	1.61	1.97	17	11	79	10	0	1
58927	1	56	0	0	158	49	19.63	2	0	0	0	0	98	60	79	4.6	1.01	4.23	0	2	1.41	28	25	58	16	0	1
58942	1	63	0	0	171	60	20.52	2	0	0	0	0	117	80	70	5.2	0.88	5.91	0	1.74	3.16	16	14	73	24	0	1
58959	0	56	1	1	155	79.2	32.97	4	1	0	1	1	150	96	60	6.6	1.56	4.38	0	1.14	2.27	25	45	104	43	0	1
58728	0	59	0	0	158	54.2	21.71	2	0	0	0	0	124	80	72	5	1.5	5.83	0	1.58	3.51	25	23	72	13	0	1
58832	0	50	0	0	166	55.9	20.29	2	0	0	0	0	100	66	76	4.9	0.96	4.76	0	1.5	2.25	19	17	63	12	0	1
61231	0	41	0	0	155	53	22.06	2	0	0	0	0	110	76	78	5.1	0.67	4.6	0	1.71	2.2	19	21	29	8	0	1
61250	1	42	0	0	165.5	74.4	27.16	3	0	1	1	0	121	84	82	5.3	2.89	3.59	0	0.9	1.64	13	23	82	16	0	1
61267	0	41	0	0	151	52.2	22.89	2	0	0	0	0	106	70	74	5.5	1.09	4.4	0	1.38	2.05	15	12	55	15	0	1
61282	0	40	0	0	156	54	22.19	2	0	0	0	0	110	70	92	5	0.98	4.67	0	1.59	2.43	16	9	36	13	0	1
61284	0	41	0	0	167	63.2	22.66	2	1	0	0	0	136	86	78	4.2	0.94	3.81	0	1.51	1.59	17	20	43	13	0	1
61299	0	42	0	0	159.5	60.6	23.82	2	0	0	0	0	120	80	76	4.7	0.62	4.49	0	1.7	1.93	22	17	36	9	0	1
61318	0	43	0	0	152.5	61.2	26.32	3	0	0	0	0	110	80	72	5.2	0.67	4.41	0	1.55	2.29	23	47	59	24	1	2
61380	1	41	1	1	165.5	66.2	24.17	2	0	1	0	0	112	62	66	4.8	2.39	5.33	0	1.21	3.23	24	34	61	21	0	1
61403	0	48	0	0	158	60.7	24.32	2	0	0	0	0	120	80	69	5.2	1	5.18	0	1.61	2.65	25	38	53	23	0	1
61405	0	48	0	0	160	50.8	19.84	2	0	0	0	0	100	70	76	5.4	0.49	4.29	0	1.71	1.78	22	23	74	10	0	1
56916	0	28	0	0	160	53.8	21.02	2	0	0	0	1	100	70	82	5.6	0.74	3.99	0	2.13	1.44	21	11	59	10	0	1
56941	0	49	0	0	155	59.6	24.81	2	1	0	0	0	144	92	60	4.4	1.54	5.07	0	1.76	3.01	22	25	70	32	0	1
57277	0	24	0	0	164.5	59.1	21.84	2	0	0	0	0	100	70	74	4.9	0.81	4.39	0	2.23	1.91	20	13	55	15	0	1
57350	0	48	0	0	160	63.8	24.92	2	1	1	0	1	136	96	70	5.6	2.54	5.03	0	1.7	3.03	22	25	80	21	0	1
57384	0	57	0	0	156.5	62.6	25.56	3	0	1	0	0	120	80	70	5.2	1.83	5.43	0	1.78	3.21	27	32	150	164	0	1
52478	1	26	0	0	171.5	53.1	18.05	1	0	0	0	0	121	62	91	4.9	0.42	4.89	0	1.98	2.87	17	17	68	14	0	1
54361	1	37	0	0	174.5	69.4	22.79	2	0	0	0	0	122	83	72	5.1	1.51	4.67	0	1.45	2.53	24	26	65	18	0	1
55529	1	29	0	0	171	55	18.81	2	0	0	0	0	124	73	78	4.9	1.31	3.33	0	1.62	1.5	17	10	76	15	0	1
55661	0	32	0	0	157	46.1	18.7	2	0	0	0	0	120	80	73	4.6	0.85	5.01	0	2.43	2.3	23	16	53	12	0	1
60845	1	40	1	2	173	74.2	24.79	2	0	1	0	1	125	81	83	5.9	3.85	5.86	0	1.38	3.31	38	63	65	86	0	1
60920	1	46	0	0	171	65	22.23	2	0	0	0	0	124	84	79	4.8	1.25	5.3	0	1.29	3.31	19	20	82	25	0	1
60959	1	43	0	0	171	68	23.26	2	0	0	0	0	108	68	71	4.2	1.37	4.74	0	1.26	2.88	50	88	45	22	0	1
60984	1	40	1	1	175	84.6	27.62	3	0	1	0	0	104	66	82	4.8	5.16	5.6	0	1.3	2.73	24	52	60	65	0	1
61002	1	41	0	0	180	77.8	24.01	2	0	1	0	0	106	67	81	5.1	1.94	4.93	0	1.21	3.01	16	21	71	28	0	1
61027	0	40	0	0	154	48.7	20.53	2	1	0	0	0	130	90	72	4.7	0.81	4.72	0	1.9	2.07	17	12	34	7	0	1
61052	0	41	0	0	157	51.7	20.97	2	0	0	0	0	100	70	72	4.8	1.17	4.91	0	1.58	2.54	20	17	52	22	1	2
52412	1	60	1	1	173.5	72.5	24.08	2	0	1	0	0	123	75	60	4.9	2.1	5.52	0	1.52	2.74	23	31	67	35	0	1
52419	1	27	0	0	179	65.8	20.54	2	0	0	0	0	109	69	86	4.3	0.73	3.71	0	1.48	1.6	23	27	102	15	0	1
54359	0	53	0	0	159	61	24.13	2	0	0	0	0	100	70	65	4.8	0.85	5.07	0	1.8	2.41	19	17	58	19	0	1
61158	1	55	0	0	163	66.7	25.1	3	0	1	0	0	117	79	86	5.5	2.67	5.72	0	1.41	3.2	20	33	65	26	0	1
61175	1	55	1	1	163	77.5	29.17	3	0	0	1	0	116	68	66	4.4	1.1	3.76	0	1.02	1.96	18	20	101	43	0	1
61190	1	54	0	0	174	86.5	28.57	3	0	0	0	1	123	83	78	5.6	1.23	5.83	0	1.34	3.53	18	28	73	23	0	1
61208	1	59	0	0	171	67	22.91	2	1	0	0	1	148	94	74	6.3	1.48	6.26	1	1.7	3.43	24	44	100	42	0	1
61222	1	40	1	1	172	72	24.34	2	0	1	0	0	111	74	84	5	1.94	5.75	0	1.13	3.68	18	27	47	36	0	1
61240	1	39	0	0	171.5	60.8	20.67	2	1	0	0	0	142	101	80	4.2	1.1	5.15	0	2.06	2.8	23	13	98	24	0	1
60879	0	44	1	1	163	65.6	24.69	2	0	1	1	0	110	76	74	4.8	2.36	4.27	0	1.2	1.89	20	25	89	30	0	1
60918	1	48	0	0	171.5	72.6	24.68	2	0	0	0	0	107	65	73	5.1	1.13	4.11	0	1.34	1.81	20	29	76	15	0	1
60936	1	54	1	2	172.5	74	24.87	2	0	1	0	1	110	68	77	6.1	1.97	6.02	1	1.29	3.83	50	106	78	31	0	1
60954	1	53	1	2	167.5	92.1	32.83	4	1	0	0	0	145	83	85	5.3	1.03	4.44	0	1.07	2.55	28	38	73	15	0	1
61004	1	41	1	1	166	69	25.04	3	0	1	0	1	126	77	73	6	3.38	4.99	0	1.15	2.07	26	50	81	42	0	1
61086	1	45	1	1	171.5	79.4	27	3	0	1	0	0	119	74	88	5.1	1.72	3.75	0	1.17	2.06	17	17	97	26	0	1
59140	1	45	0	0	167	66	23.67	2	1	1	0	1	130	86	80	5.8	2.59	6.43	1	1.4	3.65	26	31	59	37	0	1
60867	0	47	0	0	160	53.1	20.74	2	1	0	0	0	130	80	66	4.7	0.58	6.24	1	1.96	3.51	19	13	51	14	0	1
60910	1	45	0	0	164.5	66.7	24.65	2	0	0	0	0	127	79	64	4.9	0.99	5.67	0	1.65	3.43	23	38	44	35	1	2
60944	1	50	0	0	177	80	25.54	3	0	1	0	1	109	75	71	8.5	2.37	5.84	0	1.19	3.62	20	28	78	45	0	1
60978	0	43	0	0	154	59.9	25.26	3	0	0	0	0	100	70	64	5.3	1.1	4.02	0	1.69	1.76	18	15	63	13	0	1
61003	0	40	0	0	165	55	20.2	2	0	0	0	0	106	74	76	4.6	0.5	3.91	0	1.66	1.49	17	15	44	11	0	1
61012	1	40	0	0	172	66.4	22.44	2	0	1	0	1	114	62	91	5.6	1.95	4.11	0	1.05	2.35	17	18	64	29	0	1
52424	1	31	0	0	170.5	74.7	25.7	3	0	0	0	0	126	67	79	5.2	0.68	4.46	0	1.61	2.69	22	22	56	19	0	1
52426	1	27	0	0	175	68.2	22.27	2	1	1	1	0	131	72	77	4.8	1.95	4.87	0	0.93	2.88	24	29	57	37	0	1
52441	1	58	0	0	176	74	23.89	2	0	0	0	0	116	81	86	5.4	0.89	4.97	0	1.71	2.97	35	23	84	25	0	1
56541	1	36	0	0	173.5	82.3	27.34	3	0	0	0	0	100	60	82	4.7	1.2	4.68	0	1.39	2.55	24	46	84	36	0	1
60897	0	48	0	0	160	58.8	22.97	2	1	1	1	0	144	90	72	5.2	2.05	4.43	0	1.17	2.33	19	18	77	23	0	1
60931	0	43	0	0	163.5	61.3	22.93	2	0	0	0	0	110	74	72	4.6	0.81	5.8	0	1.85	2.63	27	37	60	12	0	1
60967	1	41	0	0	165.5	70.4	25.7	3	1	0	0	0	137	76	84	5.3	0.81	3.89	0	1.46	1.67	20	25	73	38	0	1
60982	0	40	0	0	152	57	24.67	2	0	0	0	0	100	70	68	5.3	1.39	5.96	0	1.48	3.59	20	22	35	14	0	1
58839	0	39	0	0	163.5	56	20.95	2	0	0	0	0	100	70	66	5.1	0.97	4.33	0	1.75	1.73	27	15	56	21	0	1
58864	1	43	1	1	170	75.2	26.02	3	0	0	0	0	125	79	87	5.2	1.58	5.47	0	1.26	3.03	23	22	54	24	0	1
58921	1	37	1	1	169.5	75	26.1	3	0	1	0	0	129	78	94	5.5	4.05	5.83	0	1.16	2.91	23	33	72	16	0	1
59007	1	51	1	1	173.5	85.4	28.37	3	0	0	1	0	109	69	82	4.5	1.54	3.46	0	1.03	1.71	23	25	62	20	0	1
59032	0	37	0	0	166	70.4	25.55	3	0	1	0	0	110	80	70	5	3.73	4.96	0	1.48	2.6	20	14	59	20	0	1
61376	1	54	0	0	170	63	21.8	2	0	0	0	0	129	76	80	4.8	1.15	5.66	0	1.53	2.97	19	9	63	16	0	1
61393	0	41	0	0	163	51.2	19.27	2	0	0	0	0	110	80	76	5	1.67	6.06	1	1.7	3.12	23	22	42	11	0	1
61476	1	45	0	0	175.5	82.8	26.88	3	0	0	0	0	121	79	89	5	1.02	3.47	0	1.39	1.48	36	60	113	222	0	1
61526	1	56	0	0	163.5	60.6	22.67	2	1	0	0	0	120	85	78	5	0.87	4.92	0	1.72	2.67	26	16	73	14	0	1
61557	1	51	0	0	173	75.5	25.23	3	0	0	0	0	102	56	61	4.9	1.01	3.7	0	1.3	1.62	31	26	66	18	0	1
57263	0	57	1	1	169	64.6	22.62	2	0	0	0	0	120	80	72	4.9	1.52	4.32	0	1.77	2.14	25	30	98	15	0	1
57278	0	49	0	0	163	67.1	25.25	3	0	0	0	0	100	66	76	5.5	1.43	5.76	0	1.77	3.66	19	7	73	12	0	1
57346	1	33	1	2	171.5	79.6	27.06	3	0	0	0	1	127	79	99	5.7	1.33	4.89	0	1.26	3.2	57	76	73	60	0	1
57395	1	57	0	0	175.5	69	22.4	2	1	0	0	1	150	99	57	6	0.88	4.61	0	1.33	2.56	16	19	42	14	0	1
60992	1	42	0	0	168.5	74.6	26.27	3	0	0	0	0	120	82	86	4.6	0.6	3.24	0	1.32	1.38	23	34	56	18	0	1
61005	1	41	1	1	173.5	76.7	25.48	3	1	1	0	1	130	77	58	5.8	2.1	4.76	0	1.22	2.73	18	23	85	21	0	1
61055	1	60	0	0	169.5	68.2	23.74	2	0	0	0	0	114	81	87	5.3	1.07	3.93	0	1.2	1.88	25	41	89	38	0	1
61073	1	41	1	1	173	79.8	26.66	3	0	0	0	0	96	65	80	4.7	1.63	4.93	0	1.34	2.69	17	12	69	16	0	1
61091	1	53	1	1	175	84.7	27.66	3	1	0	1	1	159	93	83	8.9	1.12	4.78	0	1.02	2.95	24	54	86	66	0	1
61206	1	58	1	1	171.5	90.9	30.91	4	1	0	0	0	139	91	NULL	5	0.55	3.91	0	1.12	2.31	22	33	68	24	0	1
61281	0	42	0	0	155	61	25.39	3	0	0	0	0	100	70	83	4.7	0.71	5.79	0	1.67	3.29	17	19	53	18	0	1
61300	1	40	1	1	169.5	81.2	28.26	3	1	1	0	1	136	87	79	7.9	2.84	6.27	1	1.33	4.07	23	38	70	61	0	1
61315	1	42	1	1	173.5	86.2	28.64	3	1	1	0	1	152	91	116	5.7	1.81	6.2	1	1.55	3.55	27	43	62	77	0	1
61317	1	42	0	0	175	70	22.86	2	0	0	0	0	104	62	86	4.4	1.09	4.9	0	1.27	2.66	25	28	68	15	0	1
61334	1	41	0	0	167.5	69.7	24.84	2	1	0	0	1	138	86	100	5.6	1.28	5.27	0	1.2	3.34	16	36	64	24	0	1
61398	1	40	1	1	173	76	25.39	3	1	1	0	0	137	86	80	4.7	2.88	6.03	1	1.34	3.5	19	22	85	33	0	1
61434	1	42	0	0	171	70	23.94	2	0	0	0	0	114	76	68	5.5	0.67	3.8	0	1.35	2.17	17	12	55	24	0	1
61451	1	41	0	0	163	64.7	24.35	2	0	0	0	1	117	77	74	5.9	1.16	5.58	0	1.52	3.21	22	27	64	17	0	1
53927	0	59	0	0	165	72.9	26.78	3	1	1	0	1	130	80	66	5.6	2.23	6.04	1	1.54	3.63	24	19	64	22	0	1
54197	0	54	0	0	143	48.4	23.67	2	1	0	0	0	150	100	68	4.8	1.32	5.23	0	1.71	2.66	22	23	94	13	1	2
61348	0	54	1	1	156.5	62	25.31	3	0	1	1	0	120	82	82	4.7	2.62	4.34	0	1.18	2.46	19	15	92	15	0	1
61365	1	55	0	0	172.5	84.6	28.43	3	0	1	0	0	113	64	52	4.1	1.84	4.71	0	1.21	2.63	49	81	53	36	0	1
61418	1	57	0	0	157.5	65.5	26.4	3	0	0	0	0	127	78	74	5.5	0.53	4.34	0	1.68	2.05	15	14	73	12	0	1
61482	1	43	1	1	168	78.3	27.74	3	0	1	0	0	126	81	71	4.9	5.13	5.25	0	1.16	2.45	29	45	58	26	0	1
61537	1	41	1	2	165.5	78.3	28.59	3	1	1	0	0	128	85	73	4.7	2.77	5.07	0	1.14	3.2	22	33	89	30	0	1
61580	1	49	0	0	166.5	64.8	23.37	2	0	1	0	1	122	80	80	6.5	2.32	4.6	0	1.14	2.28	25	47	65	16	0	1
61603	1	39	0	0	178	66.8	21.08	2	0	0	0	0	121	78	74	5	1.47	4.49	0	1.76	2.21	19	25	54	24	0	1
61605	0	39	0	0	155	47.4	19.73	2	0	0	0	0	100	70	72	4.3	0.67	3.77	0	1.48	1.66	24	27	53	11	0	1
61739	1	44	0	0	184	83	24.52	2	0	0	0	0	117	73	77	4.8	1.03	4.49	0	1.15	2.73	17	19	53	22	0	1
61771	1	38	0	0	156	66.2	27.2	3	0	0	0	0	128	79	95	5.4	0.57	4.6	0	1.58	2.38	26	39	61	25	0	1
52499	0	29	0	0	171.5	66	22.44	2	0	0	0	0	116	80	73	5.3	1.04	5.06	0	2.08	2.46	23	18	48	12	0	1
52967	1	31	1	2	158	74	29.64	3	1	0	0	0	123	88	80	4.3	1.08	4.75	0	1.27	2.82	47	107	91	38	0	1
52968	1	49	0	0	168	85.5	30.29	4	0	0	0	0	116	74	70	4.9	1.28	6.31	1	1.73	3.8	18	19	63	36	0	1
52986	0	47	0	0	167	49.2	17.64	1	0	0	0	0	110	80	86	5.4	1.28	5.72	0	1.32	3.56	12	7	80	13	0	1
55625	0	35	0	0	152.5	50.4	21.67	2	0	0	0	0	116	76	78	5.3	0.71	4.47	0	1.57	2.35	18	12	23	15	0	1
55658	1	39	1	2	171	74	25.31	3	1	0	0	0	129	88	88	5.3	1.47	5.6	0	1.22	3.48	53	65	84	65	0	1
52413	1	29	0	0	178	73.1	23.07	2	1	0	0	0	125	87	83	5	1.18	3.97	0	1.26	2.06	14	8	92	17	0	1
52488	1	26	0	0	179.5	78.7	24.43	2	1	0	0	0	130	68	61	4.8	1.62	4.14	0	1.2	2.07	17	24	76	22	0	1
55530	1	29	0	0	178	66.2	20.89	2	0	0	0	0	125	80	71	5.4	1.17	4.09	0	1.61	2.14	16	14	70	13	0	1
55662	1	30	0	0	174.5	69.4	22.79	2	0	0	0	0	121	64	75	4.2	0.62	4.93	0	1.6	2.87	18	7	52	13	0	1
56023	1	65	0	0	168.5	63.8	22.47	2	0	0	0	1	128	75	64	5.9	0.71	4.78	0	2.1	2.47	19	7	83	25	0	1
53929	1	39	1	1	176.5	80.4	25.81	3	1	1	0	0	131	86	65	4.3	1.93	7	1	1.32	5.39	42	39	84	33	0	1
54246	0	38	0	0	160	59.8	23.36	2	0	0	0	0	110	76	61	4.9	1.06	4.06	0	1.35	2.03	17	19	32	12	0	1
55933	1	44	0	0	171	59.4	20.31	2	0	0	0	0	101	65	71	4	1.16	4.46	0	1.89	2.39	25	24	92	109	0	1
56703	1	33	0	0	177	68.6	21.9	2	0	1	0	0	116	73	73	4.9	2.08	6.12	1	1.56	3.39	22	34	82	34	0	1
56705	1	40	0	0	169.5	77.4	26.94	3	0	1	1	1	103	59	81	6.4	2.88	4.67	0	0.98	2.83	37	45	72	21	0	1
61136	1	56	1	1	171.5	74.2	25.23	3	1	0	0	0	155	99	91	5.4	1.48	4.87	0	1.33	2.69	17	20	80	13	0	1
61143	1	59	0	0	173	66.7	22.29	2	0	1	0	1	100	74	90	12.1	2.51	6.15	1	1.27	3.62	19	20	54	20	0	1
61179	1	47	0	0	171	97	33.17	4	1	0	0	0	171	110	90	5.2	1.64	4.88	0	1.42	2.49	13	26	70	29	0	1
61186	1	56	0	0	171.5	74.4	25.3	3	1	0	0	0	145	83	70	4.9	1.01	5	0	1.33	2.65	19	19	68	25	0	1
61193	1	56	0	0	175.5	73.3	23.8	2	0	0	0	0	117	74	98	5.4	1.64	4.47	0	1.23	2.5	20	23	52	22	0	1
61204	1	46	0	0	171.5	69	23.46	2	0	0	0	0	92	64	96	4.9	0.81	5.24	0	1.32	2.88	17	17	86	24	0	1
61070	0	45	0	0	161	63	24.3	2	0	0	0	0	110	78	76	4.8	1.11	4.73	0	1.66	2.3	22	20	76	17	0	1
61095	1	53	0	0	169	65.8	23.04	2	0	0	0	0	129	74	79	4.9	0.89	4.01	0	1.18	2.39	17	20	99	26	0	1
61195	1	61	0	0	171.5	75.2	25.57	3	0	0	0	0	122	78	68	4.9	1.46	4.94	0	1.17	3.11	22	23	71	15	0	1
61263	1	43	0	0	173	72.6	24.26	2	1	1	0	0	141	103	83	4.9	3.43	4.42	0	1.2	2.02	21	43	54	34	0	1
61288	1	40	0	0	168	72.8	25.79	3	0	1	0	1	127	79	74	8.7	4.02	5.22	0	1.11	2.69	20	21	133	18	0	1
61345	1	43	0	0	169	74	25.91	3	1	1	0	0	140	96	66	5.2	3.82	5.78	0	1.38	3.4	18	17	78	23	0	1
61377	1	48	1	1	164	74.2	27.59	3	0	0	0	1	116	77	71	5.8	1.61	4.29	0	1.16	2.23	34	56	76	28	0	1
61258	1	41	1	1	170	95.4	33.01	4	0	0	1	0	122	79	63	4.9	1.62	4.49	0	0.92	2.77	17	23	60	18	0	1
61290	0	42	0	0	165	50.7	18.62	2	0	0	0	0	104	68	72	4.7	0.72	4.73	0	1.75	2.34	15	10	33	9	0	1
61375	0	49	0	0	163	52	19.57	2	0	0	0	0	120	78	76	5.2	0.83	5.69	0	1.56	3.14	24	30	63	24	0	1
61390	0	41	0	0	169.5	60.4	21.02	2	0	0	0	0	100	70	68	5.5	1.59	4.9	0	1.37	2.51	14	9	45	11	0	1
61407	0	49	1	1	159	63.6	25.16	3	1	1	1	0	140	100	76	5.5	3.61	6.04	1	1.18	3.58	16	20	66	26	0	1
61408	0	46	0	0	164	55	20.45	2	0	0	0	0	110	70	67	5.1	0.55	5.8	0	2.18	2.63	20	13	63	13	0	1
61035	0	40	0	0	164.5	55.2	20.4	2	0	0	0	0	106	70	74	4.6	0.65	3.65	0	1.3	1.9	17	13	26	16	0	1
61076	1	43	1	1	172	83.4	28.19	3	0	0	0	0	96	57	63	4.6	0.61	3.32	0	1.11	1.65	28	40	38	21	0	1
61110	1	57	1	1	171.5	79	26.86	3	1	0	0	0	143	88	95	5.4	1.18	5.53	0	1.78	2.8	25	22	50	44	0	1
61112	1	48	1	1	166	71	25.77	3	0	0	0	1	111	71	73	5.9	0.91	4.2	0	1.4	1.9	12	23	64	22	0	1
61146	1	58	0	0	179	75	23.41	2	1	1	0	1	137	103	88	5.7	2.22	7.27	1	1.55	4.89	25	42	47	61	0	1
61171	1	51	1	1	176	83.8	27.05	3	1	1	0	1	144	79	67	5.7	2.02	4.32	0	1.19	2.47	37	54	104	49	0	1
61205	1	50	0	0	169	67.7	23.7	2	0	0	0	0	125	83	86	4.3	1.06	4.26	0	1.32	2.13	22	28	59	21	0	1
60997	1	42	0	0	171	76.7	26.23	3	1	0	0	0	130	71	91	4.9	1.46	4.63	0	1.49	2.45	16	16	68	31	0	1
61031	1	39	0	0	171	74.1	25.34	3	0	1	0	0	109	62	70	5.2	3.22	5.83	0	1.3	3.53	21	38	56	30	0	1
61067	0	41	0	0	159	50	19.78	2	0	0	0	0	100	70	66	4.6	0.98	3.91	0	1.45	2.04	19	21	60	16	0	1
61148	1	50	1	1	172.5	74.6	25.07	3	1	1	1	1	143	81	72	5.8	1.95	3.93	0	0.89	2.1	25	44	61	24	1	2
61150	1	52	0	0	171	59.3	20.28	2	0	0	0	0	126	75	69	4.8	0.61	5.71	0	1.64	3.31	22	25	50	13	0	1
61214	1	40	0	0	172.5	64.4	21.64	2	0	0	0	0	103	65	66	4.3	0.93	4.91	0	1.54	2.37	23	24	50	25	0	1
61216	1	40	1	1	171	74.6	25.51	3	0	1	0	0	121	75	79	5.1	3.18	5.8	0	1.49	2.88	31	42	69	48	0	1
61233	1	40	0	0	179	83	25.9	3	0	0	0	0	114	64	71	4.6	0.86	4.72	0	1.49	2.69	24	12	70	19	0	1
61593	0	51	0	0	160	61.2	23.91	2	0	0	0	0	120	80	71	4.8	0.96	5.55	0	1.52	3.43	18	15	82	17	0	1
61607	0	41	0	0	149	54	24.32	2	0	0	1	0	100	66	76	4.8	1.09	4.65	0	1.12	2.56	15	11	52	11	0	1
61693	1	40	0	0	171.5	67.9	23.09	2	0	1	1	0	116	79	85	5.3	1.73	3.8	0	0.98	1.95	15	30	57	38	0	1
61757	1	38	0	0	170	63.6	22.01	2	0	1	0	0	122	67	53	4.7	1.9	5.3	0	1.76	2.44	22	13	78	14	0	1
61775	0	38	0	0	161	52	20.06	2	0	0	0	0	100	70	74	4.4	1.44	4.54	0	1.45	2.09	15	11	31	9	0	1
61485	0	42	0	0	160	55.4	21.64	2	0	0	0	0	120	80	69	4.8	0.91	4.87	0	1.7	2.64	16	10	40	15	0	1
61534	1	52	0	0	171.5	57.3	19.48	2	0	0	0	0	102	63	78	4.1	1.35	5.73	0	1.95	2.78	18	31	53	34	0	1
61568	1	47	0	0	175	63	20.57	2	0	1	0	1	101	69	85	10.5	2.79	6.11	1	1.33	3.96	22	37	85	22	0	1
61583	1	48	1	2	173	90.4	30.2	4	1	1	0	0	130	80	62	4.8	2.66	5.43	0	1.05	3.29	16	32	56	24	0	1
61602	1	40	1	2	178	79.2	25	3	1	0	0	1	152	110	76	6.1	1.66	5.83	0	1.42	3.37	20	37	66	22	0	1
61617	1	39	0	0	167.5	67.9	24.2	2	0	1	0	0	113	65	72	4.1	2.7	5.54	0	1.36	2.99	21	23	67	23	0	1
59057	1	29	0	0	175	64.1	20.93	2	1	0	0	0	133	67	89	5.5	0.75	4.17	0	1.79	1.87	26	48	107	16	0	1
59082	1	55	0	0	164	51.3	19.07	2	0	0	0	0	94	58	58	4.3	0.89	4.72	0	1.41	2.56	30	22	79	18	0	1
60868	1	44	0	0	163	69	25.97	3	1	1	0	0	153	93	76	5.2	2.24	4.74	0	1.24	2.51	19	24	69	26	0	1
60886	0	41	0	0	168.5	68	23.95	2	0	1	1	0	120	80	77	4.6	1.82	4.9	0	1.14	2.81	18	18	45	19	0	1
61241	1	40	0	0	173	67.2	22.45	2	1	1	0	0	117	86	73	5.4	2.4	4.31	0	1.15	2.13	25	37	42	30	0	1
61306	1	40	0	0	163	50.7	19.08	2	0	0	0	0	120	82	61	4.1	0.92	4.59	0	1.53	2.13	21	23	67	13	0	1
61324	0	39	0	0	164	65.8	24.46	2	0	0	0	0	118	76	73	4.7	0.8	3.83	0	1.39	1.74	13	11	54	9	0	1
61374	1	45	0	0	171.5	69.2	23.53	2	1	0	0	0	133	88	69	5	1.01	5.3	0	1.45	3.07	21	23	65	20	0	1
61391	0	42	0	0	152.5	50.2	21.59	2	0	0	0	0	100	70	65	4.8	0.68	4.67	0	1.68	2.26	19	14	50	18	0	1
61406	1	42	1	1	174	71.6	23.65	2	1	1	0	0	140	98	84	5.5	2.05	3.93	0	1.09	1.91	20	28	68	22	0	1
61423	1	39	0	0	180	77	23.77	2	0	1	1	0	121	73	77	4.5	2.93	4.16	0	0.91	2.29	29	66	61	43	0	1
61778	1	38	0	0	177.5	72.5	23.01	2	0	1	0	0	113	76	69	5.3	1.78	4.58	0	1.46	2.2	22	19	59	17	0	1
61805	1	38	1	1	175	78	25.47	3	0	1	1	0	116	63	65	5.2	7.66	4.85	0	1.02	1.88	20	33	73	35	0	1
61848	1	37	0	0	171	81.2	27.77	3	0	0	0	0	121	80	71	4.9	0.7	4.59	0	1.16	2.52	16	24	78	16	0	1
61871	1	35	1	1	163	64.5	24.28	2	0	1	1	0	121	79	67	5	4.7	4.34	0	1.02	1.82	26	56	89	29	0	1
61903	0	36	0	0	154.5	53.3	22.33	2	0	0	0	0	100	70	72	4.7	0.93	3.81	0	1.53	1.52	14	15	57	18	0	1
61937	1	35	0	0	171.5	62.7	21.32	2	0	1	0	0	116	83	76	4.6	2.22	7.24	1	1.84	4.45	18	30	57	17	0	1
61946	0	39	0	0	169	63	22.06	2	0	0	0	0	120	80	84	5	0.97	3.45	0	1.6	1.09	17	14	50	11	0	1
56736	0	26	0	0	169.5	68.6	23.88	2	0	0	0	0	110	80	74	4.6	0.42	4.07	0	2	1.65	20	9	56	12	0	1
56936	1	26	1	1	183.5	88	26.13	3	1	1	0	1	134	72	79	5.7	1.94	5.15	0	1.54	3	28	55	42	81	0	1
57340	0	47	0	0	154	51	21.5	2	0	0	0	0	100	70	61	4.7	0.67	4.32	0	1.8	2.23	23	18	62	13	0	1
57357	1	24	0	0	173.5	76.3	25.35	3	0	0	0	1	122	75	88	5.6	0.91	5	0	1.46	3.24	21	21	110	17	0	1
61650	0	37	0	0	165	61	22.41	2	0	0	0	0	100	78	76	4.6	0.93	4.18	0	1.69	1.73	13	14	45	13	0	1
61699	0	36	0	0	166	51.8	18.8	2	0	0	0	0	100	70	77	5.2	0.64	4.54	0	2.07	1.78	26	20	41	23	0	1
61701	1	39	0	0	171.5	58.5	19.89	2	0	0	0	0	106	62	61	4.6	0.96	4.13	0	1.17	2.16	17	11	68	17	0	1
61716	1	37	0	0	175.5	79.1	25.68	3	0	1	0	0	115	76	80	5	3.08	4.08	0	1.2	1.92	22	27	46	25	0	1
61769	0	38	0	0	158	46	18.43	1	0	0	0	0	100	70	74	5	0.61	3.81	0	1.61	1.53	20	16	52	13	0	1
61782	1	39	0	0	172	75.4	25.49	3	0	0	0	0	123	72	69	4.5	0.9	4.22	0	1.18	2.43	21	33	61	16	0	1
61799	0	37	0	0	156	64.2	26.38	3	0	0	0	1	120	80	77	6.8	1	5.34	0	1.46	3.09	18	20	60	13	0	1
56735	0	27	0	0	154	39.9	16.82	1	0	0	0	0	100	70	72	4.7	0.73	4.52	0	1.98	2.29	22	12	50	11	0	1
56737	0	26	0	0	160	53.4	20.86	2	0	0	0	0	90	60	70	4.5	0.94	4.9	0	2.14	2.64	17	8	59	12	0	1
56905	0	21	0	0	154	60.2	25.38	3	0	0	0	0	110	70	76	5.3	0.47	4.6	0	2.22	2.14	19	16	69	16	0	1
57273	0	50	0	0	154	54	22.77	2	0	0	0	0	120	80	78	5.1	1.19	4.38	0	1.75	2.41	24	20	79	13	0	1
61254	0	42	0	0	157	68	27.59	3	0	0	0	0	110	80	73	4.7	1.21	4.2	0	1.5	1.84	14	14	55	15	0	1
61268	0	40	0	0	156.5	52.8	21.56	2	0	0	0	0	116	80	70	5	0.76	5.08	0	1.59	2.6	21	32	46	15	0	1
61347	0	46	1	1	154	47.8	20.16	2	0	1	1	0	120	80	72	4.7	4.77	4.32	0	1.16	1.73	21	31	87	34	1	2
61386	1	43	0	0	164	70.4	26.17	3	0	0	0	0	120	78	78	5	0.85	5.18	0	1.48	2.91	20	32	45	31	0	1
61411	1	53	0	0	170	79	27.34	3	1	1	0	1	135	82	83	5.7	4.03	5.2	0	1.42	2.49	28	42	56	41	0	1
61422	1	43	1	1	171.5	72.2	24.55	2	0	1	0	0	117	81	90	5.2	3.05	4.08	0	1.12	2.04	30	57	51	34	0	1
61429	0	36	0	0	156	51	20.96	2	0	0	0	0	100	70	82	4.8	0.71	5.08	0	1.88	2.5	21	16	38	9	0	1
61426	1	38	1	1	166	70	25.4	3	1	1	1	0	138	75	66	5.5	2.12	4.3	0	0.99	2.37	32	55	72	71	0	1
61443	0	39	0	0	166	74	26.85	3	0	0	0	0	100	70	90	5.2	1.23	2.91	0	1.38	0.96	14	14	31	10	0	1
61457	1	43	0	0	173.5	69.6	23.12	2	0	1	0	0	110	66	79	5.2	3.48	4.8	0	1.47	2.3	17	16	49	21	0	1
61475	0	43	0	0	151	56.5	24.78	2	0	0	0	1	110	80	85	6.1	1.29	5.09	0	1.58	2.87	48	58	52	26	0	1
61490	0	40	0	0	159.5	57.6	22.64	2	0	0	0	0	106	70	74	4.7	0.89	4.66	0	1.87	2.15	17	14	54	10	0	1
61493	1	37	0	0	171.5	68.2	23.19	2	0	0	0	0	104	64	61	5.1	1.39	4.34	0	1.48	2.27	19	22	62	21	0	1
61525	1	48	0	0	173.5	69	22.92	2	0	0	0	0	111	79	80	5.3	1.07	5.61	0	1.1	3.74	20	25	103	27	0	1
61540	1	58	1	1	171.5	88	29.92	3	1	1	0	1	177	117	77	6.1	3.09	5.68	0	1.35	3.26	22	30	64	66	0	1
61280	0	39	0	0	154.5	59.8	25.05	3	0	0	0	1	120	80	104	6	1.28	4.81	0	1.47	2.46	15	18	46	19	0	1
61312	1	40	0	0	164	64.1	23.83	2	0	0	1	0	105	75	75	4.6	0.75	3.47	0	1.03	1.82	25	31	51	14	0	1
61337	0	39	0	0	160	63.6	24.84	2	0	0	0	0	100	70	68	5.1	1.31	4.55	0	1.35	2.31	12	12	32	15	0	1
61344	1	43	0	0	157	50.5	20.49	2	0	0	0	0	107	69	70	4.7	0.6	3.95	0	1.37	1.9	19	17	49	15	0	1
61371	1	44	1	1	174	90	29.73	3	1	1	0	0	131	83	66	4.9	4.7	5.6	0	1.07	3.01	25	62	93	73	0	1
61412	0	42	0	0	165.5	68.4	24.97	2	0	0	1	0	110	80	76	5.3	1.1	3.99	0	1.24	2.35	19	18	51	34	0	1
61439	1	39	1	1	171	98.6	33.72	4	1	1	0	0	141	91	81	5.3	3.1	4.98	0	1.15	2.71	23	38	51	20	0	1
56751	0	24	0	0	158	53.8	21.55	2	0	0	0	0	116	80	88	4.8	0.82	4.64	0	1.71	2.53	14	22	59	19	0	1
56783	0	30	0	0	157	51	20.69	2	0	1	0	0	100	70	72	4.5	2.05	5.87	0	2.04	3.34	13	6	52	20	0	1
56915	0	21	0	0	162	53.9	20.54	2	0	0	0	0	100	70	61	4.6	0.42	4.77	0	2.1	2.47	19	8	51	12	0	1
56940	0	35	0	0	158	60.2	24.11	2	0	0	0	0	110	74	90	5	0.81	4.43	0	1.68	2.46	22	32	20	16	0	1
61388	1	40	0	0	171	64	21.89	2	0	0	0	0	113	75	69	5	0.93	4.55	0	1.56	2.23	13	11	51	18	0	1
61413	1	45	0	0	169	74.2	25.98	3	0	0	0	0	105	67	63	4.4	1.47	4.31	0	1.22	2.46	29	25	61	24	0	1
61427	1	39	1	1	172.5	83.6	28.09	3	0	1	0	0	123	73	66	4.6	2.35	6.11	1	1.28	3.62	28	65	59	75	0	1
61438	1	42	1	1	169	76.2	26.68	3	1	1	1	1	143	98	96	10.3	1.73	4.17	0	0.97	2.51	36	74	95	41	0	1
61502	1	57	0	0	164	59.8	22.23	2	1	0	0	0	146	95	77	4.5	0.77	5.75	0	2.2	2.67	32	15	80	78	0	1
61513	1	57	0	0	164	67.9	25.25	3	0	0	0	1	124	69	70	5.8	0.99	4.72	0	1.12	2.64	18	28	60	16	0	1
61527	1	57	0	0	169.5	66.4	23.11	2	0	1	0	1	110	68	72	6.6	1.71	5.14	0	1.56	2	30	53	56	43	0	1
61531	1	58	0	0	171.5	69.8	23.73	2	0	0	0	0	123	73	82	5.4	1.14	4.94	0	1.5	2.77	17	25	54	28	0	1
61248	1	41	0	0	175.5	69.4	22.53	2	1	0	0	1	148	101	68	7.3	1.42	4.23	0	1.26	2.21	28	47	80	70	0	1
61301	1	41	0	0	166	67.2	24.39	2	1	1	0	1	138	83	100	6.6	5.31	6.28	1	1.5	3.42	23	43	56	95	0	1
61314	0	41	0	0	152	40.2	17.4	1	0	0	0	0	100	70	66	4.8	1.17	5.53	0	1.86	2.75	19	14	47	12	0	1
61350	0	49	0	0	160	56.2	21.95	2	0	1	0	0	126	74	72	5.4	1.72	4.13	0	1.34	2.39	18	19	72	25	0	1
61401	1	42	0	0	182	77.2	23.31	2	0	1	0	0	126	84	80	5.2	2.89	4.9	0	1.25	2.18	20	23	73	29	0	1
61435	1	40	0	0	172	78.2	26.43	3	1	1	0	1	134	84	75	5.8	1.76	5.2	0	1.1	3.37	15	27	69	15	0	1
61465	1	44	0	0	173	65.6	21.92	2	0	1	0	0	101	68	80	4.7	1.7	5.84	0	1.62	3.37	25	17	45	22	0	1
61948	1	35	1	2	176	83.6	26.99	3	1	0	0	1	148	92	78	6.6	1.61	4.23	0	1.16	2.32	23	48	64	34	0	1
62046	1	28	0	0	175	79	25.8	3	1	0	0	0	135	92	78	4.8	0.86	4.38	0	1.21	2.52	17	18	69	29	0	1
62048	1	27	0	0	164	59.6	22.16	2	0	0	0	0	122	76	72	4.6	0.74	4.94	0	1.35	2.74	20	25	63	18	0	1
62114	1	31	1	1	176	78.8	25.44	3	0	0	0	0	118	65	63	5.2	1.36	4.96	0	1.27	3.31	21	43	89	29	0	1
62137	1	25	0	0	173.5	85	28.24	3	0	0	0	0	125	67	67	4.5	1.33	4.12	0	1.34	2.15	10	13	61	18	0	1
62207	1	46	1	1	169	69.9	24.47	2	1	0	0	0	135	87	67	5.3	1.41	3.77	0	1.17	2.11	25	25	66	38	0	1
56682	1	53	1	1	171.5	75	25.5	3	0	0	0	0	127	84	76	5.1	0.74	4.62	0	1.41	2.83	41	67	70	35	0	1
56714	1	28	0	0	168.5	65	22.89	2	0	1	0	1	123	70	66	5.7	2.03	4.83	0	1.64	2.42	17	32	72	62	0	1
56716	1	27	0	0	166	69.4	25.19	3	0	0	0	0	113	80	75	4.8	0.93	4.74	0	1.47	3.1	22	20	41	23	0	1
56739	0	26	0	0	155	51.1	21.27	2	0	0	0	0	110	70	74	5.2	0.58	4.23	0	2.12	1.97	16	11	80	11	0	1
56741	0	26	0	0	167	53.8	19.29	2	0	0	0	0	106	74	68	4.3	0.74	3.81	0	1.96	1.59	15	12	59	12	0	1
56750	0	24	0	0	157	50.2	20.37	2	0	0	0	0	100	70	72	5.4	1	4.17	0	1.64	2.18	17	12	48	14	0	1
56712	1	29	1	1	179	97.6	30.46	4	1	0	0	1	135	66	77	5.6	1.52	6.01	1	1.49	4.16	21	30	93	36	0	1
56762	0	23	0	0	162	55	20.96	2	0	0	0	0	120	80	74	5.3	0.63	4.37	0	2.23	1.99	14	9	90	13	0	1
56780	0	32	0	0	160	52.3	20.43	2	0	0	0	0	110	80	97	4.7	0.55	3.59	0	1.75	1.62	21	9	52	6	0	1
56794	0	27	0	0	160	56	21.87	2	0	0	0	1	96	64	64	5.9	1.55	5.82	0	1.64	3.46	16	8	43	12	0	1
56894	0	22	0	0	167	54	19.36	2	0	0	0	0	100	70	74	5	0.62	3.25	0	1.6	1.43	17	7	48	8	0	1
56944	0	23	0	0	172	70.3	23.76	2	0	0	0	0	100	70	64	4.6	0.85	4.98	0	2.06	2.46	16	6	70	13	0	1
61632	1	39	1	1	173	74.8	24.99	2	1	1	1	0	131	90	74	5.5	3.64	4.1	0	0.9	1.48	19	36	82	22	0	1
61649	1	38	1	1	178	83	26.2	3	1	1	0	0	123	87	83	4.7	3.2	4.89	0	1.27	2.69	45	100	56	81	0	1
61651	1	39	1	1	175.5	69.9	22.69	2	0	1	0	0	117	80	86	5.1	4.14	5.09	0	1.25	2.47	19	30	71	27	0	1
61668	0	50	0	0	152	51.7	22.38	2	0	1	0	0	120	80	94	5.4	2.11	5.32	0	1.89	2.81	19	15	99	80	0	1
61700	1	38	0	0	167.5	71	25.31	3	0	0	0	0	121	77	71	4.9	1.41	5.39	0	1.25	3.39	12	17	43	15	0	1
61768	0	36	0	0	164.5	56.8	20.99	2	0	0	0	0	110	74	72	4.8	0.8	5.44	0	1.69	2.88	19	13	46	8	0	1
61793	1	38	1	1	167.5	76.4	27.23	3	0	1	0	0	118	78	70	5.4	2.56	4.97	0	1.4	2.77	19	26	72	36	0	1
61794	1	38	1	1	165.5	73.1	26.69	3	0	1	0	0	123	67	76	4.9	1.96	5.1	0	1.24	3.1	16	20	61	16	0	1
61811	0	48	0	0	160	60.2	23.52	2	0	0	0	1	120	80	89	8.3	0.62	6.13	1	1.36	3.99	17	20	64	16	0	1
61825	0	37	0	0	163	54.8	20.63	2	0	0	0	0	100	70	77	4.8	0.76	6.64	1	2.15	4.19	14	13	66	14	0	1
61943	1	45	0	0	168.5	69.7	24.55	2	0	0	0	1	125	83	74	5.9	1.31	4.46	0	1.36	2.54	15	26	58	21	0	1
61958	1	37	0	0	171	71	24.28	2	0	0	0	1	128	74	99	7.7	1.64	4.8	0	1.28	2.46	20	32	112	24	1	2
57414	0	60	0	0	157	70	28.4	3	1	1	0	1	144	96	84	6.1	2.58	5.35	0	1.57	3.52	14	11	71	16	0	1
57445	0	30	0	0	159	51.3	20.29	2	0	0	0	0	100	70	72	5.3	1.32	4.2	0	1.44	2.4	15	6	66	13	0	1
57513	1	43	0	0	165	60.2	22.11	2	0	0	0	0	118	77	67	5.1	0.83	4.4	0	1.18	2.54	22	18	75	22	0	1
57514	1	40	1	1	172	82.4	27.85	3	0	1	0	1	108	64	81	13.4	2.31	5.19	0	1.08	3.31	22	45	68	21	0	1
57532	0	33	0	0	166	56	20.32	2	0	0	0	0	100	70	83	4.9	0.69	3.81	0	1.87	1.63	20	13	38	11	0	1
60929	0	43	1	2	169.5	93.4	32.51	4	1	1	0	1	140	94	94	6.5	2.5	5.4	0	1.48	3.13	32	50	68	33	0	1
60968	1	39	0	0	171.5	66.6	22.64	2	0	0	0	0	119	77	88	5.2	1.06	4.38	0	1.3	2.28	18	17	65	13	0	1
61018	1	42	0	0	171	73.2	25.03	3	0	0	0	0	114	68	88	4.5	1.11	6.09	1	1.49	3.7	22	23	67	18	0	1
61036	0	39	0	0	159	56.6	22.39	2	0	0	0	0	116	80	77	4.8	1.41	4.01	0	1.42	1.69	24	17	47	8	0	1
61043	1	50	1	1	166.5	71.7	25.86	3	1	1	0	1	157	97	96	6.7	3.41	6.51	1	1.78	3.52	31	33	84	62	0	1
61460	1	44	0	0	166	61	22.14	2	1	0	0	0	129	88	73	4.9	0.53	4.27	0	1.68	2.04	25	24	55	19	0	1
61509	1	50	1	1	172.5	79.1	26.58	3	1	0	0	0	135	96	60	5	1.14	4.09	0	1.42	1.87	23	31	68	51	1	2
61524	1	46	0	0	178	74	23.36	2	0	0	0	0	124	62	52	4.8	1.26	4.7	0	1.37	2.38	20	18	70	36	0	1
61541	1	52	0	0	176.5	68.7	22.05	2	1	0	0	1	128	85	78	5.6	0.95	3.91	0	1.55	1.45	19	16	56	15	0	1
61560	1	51	1	1	172.5	81.1	27.25	3	1	1	0	0	156	104	89	4.8	2.39	5.2	0	1.11	3	29	36	87	39	0	1
61710	1	39	0	0	178.5	92.4	29	3	1	1	0	0	130	88	84	4.9	2.17	5.27	0	1.42	3.17	20	33	65	49	0	1
56698	1	54	0	0	165	72	26.45	3	0	0	0	0	115	75	69	4.9	0.64	4.62	0	1.65	2.7	32	27	81	29	0	1
56700	1	41	0	0	178	80	25.25	3	1	0	0	0	133	81	76	5.4	1.23	5	0	1.6	3.06	55	65	87	173	0	1
56723	1	24	0	0	175.5	67.4	21.88	2	0	0	0	0	106	74	68	4.6	0.79	4.83	0	1.97	2.82	25	18	70	19	0	1
56757	0	23	0	0	159.5	41.6	16.35	1	0	0	0	0	90	60	72	4.8	0.49	4.8	0	2.05	2.48	22	20	46	15	0	1
56925	0	30	0	0	155.5	41.7	17.25	1	0	0	0	0	100	70	85	5.3	0.64	5.5	0	3.05	2.28	35	45	62	10	0	1
56932	1	55	0	0	181	85.5	26.1	3	0	0	0	0	106	68	71	4.9	0.98	4.02	0	1.16	2.35	21	15	51	16	0	1
56718	1	27	0	0	179.5	63.8	19.8	2	0	0	0	0	128	84	77	5.4	0.61	3.45	0	1.98	1.37	21	15	57	13	0	1
56720	1	26	0	0	172	68.6	23.19	2	1	0	0	0	137	83	76	4.8	0.88	4.4	0	1.56	2.37	17	15	67	17	0	1
56752	0	24	0	0	158	49.3	19.75	2	0	0	0	0	106	72	80	4.7	1.08	5.31	0	2	3.11	17	10	48	10	0	1
56754	0	24	0	0	174	63.3	20.91	2	0	0	0	0	104	72	86	4.5	0.75	4.75	0	1.6	2.69	14	14	43	22	0	1
56786	0	29	0	0	162.5	47	17.8	1	0	0	0	0	100	70	74	4.4	0.42	3.62	0	1.98	1.55	25	15	65	19	0	1
56788	0	29	0	0	165	50.7	18.62	2	0	0	0	0	100	70	73	4.9	0.5	3.51	0	1.81	1.51	11	6	39	9	0	1
56886	0	28	0	0	168	61.2	21.68	2	0	0	0	1	106	74	72	5.6	0.99	4.01	0	2.36	1.55	14	10	48	13	0	1
56888	0	25	0	0	151	46.4	20.35	2	0	0	0	0	110	70	68	5.1	1.27	4.51	0	1.88	2.23	19	18	38	13	0	1
61801	0	39	0	0	154	60.8	25.64	3	0	0	0	0	120	80	86	4.8	0.68	4.83	0	1.73	2.19	22	16	41	11	0	1
61818	1	39	0	0	172	68.4	23.12	2	0	0	0	0	105	70	69	4.6	1.39	4.72	0	1.26	2.86	21	29	81	19	0	1
61869	0	35	0	0	164	50.7	18.85	2	0	0	0	0	98	68	78	4.3	0.88	4.57	0	1.71	2.04	19	13	37	11	0	1
61884	1	39	0	0	169	53	18.56	2	0	0	0	0	95	66	68	4.7	1.41	4.75	0	1.67	2.03	15	16	64	14	0	1
62035	1	28	0	0	175.5	77.4	25.13	3	1	1	0	0	136	85	65	4.7	2.07	4.86	0	1.21	2.57	25	39	98	39	0	1
62135	1	24	0	0	178	69.2	21.84	2	0	0	0	0	106	65	72	5.1	0.58	3.88	0	1.67	1.65	15	13	78	14	0	1
57562	1	30	1	1	178.5	99.4	31.2	4	1	1	1	0	135	80	78	5.2	8.9	5.03	0	0.96	1.72	59	111	89	70	0	1
57665	0	61	0	0	154.5	62.2	26.06	3	1	1	1	1	150	100	80	5.7	1.95	6.03	1	1.17	3.7	24	31	109	152	0	1
57679	0	50	0	0	156	50.8	20.87	2	0	1	0	1	120	80	70	5.7	2.21	6.9	1	1.47	3.47	20	16	109	10	0	1
57716	0	63	0	0	163.5	75.4	28.21	3	1	0	0	1	150	100	76	5.8	1.3	4.66	0	1.46	1.88	15	20	70	13	1	2
61575	1	53	0	0	168	75.5	26.75	3	1	0	0	0	145	86	73	4.9	1.29	4.62	0	1.25	2.71	13	12	63	19	0	1
61643	0	37	0	0	171	60.2	20.59	2	0	0	0	0	100	70	74	4.4	1.15	5.71	0	1.85	2.96	22	23	59	14	0	1
61675	1	50	0	0	171	65.2	22.3	2	1	0	0	1	136	75	100	6.1	1.68	6.44	1	1.6	3.91	23	18	42	29	0	1
61690	1	41	1	1	168.5	76.6	26.98	3	0	1	0	0	116	75	78	5.1	6.22	5.16	0	1.3	1.73	19	38	91	27	0	1
61725	0	38	0	0	158	67.4	27	3	1	0	0	0	126	88	78	4.7	0.98	4.7	0	1.72	2.18	19	18	40	13	0	1
61744	0	48	1	1	159.5	73.8	29.01	3	0	1	0	0	120	82	75	5.2	1.89	4.68	0	1.4	2.56	18	18	62	16	0	1
61808	0	40	0	0	155	56.4	23.48	2	0	0	0	0	110	80	76	4.6	0.71	5.26	0	1.6	3.14	24	35	52	17	0	1
61447	1	46	1	1	171	68.7	23.49	2	0	1	0	1	126	82	94	6.3	1.77	4.49	0	1.49	2.06	18	14	65	15	0	1
61472	0	43	0	0	160	53.8	21.02	2	0	0	0	0	100	70	81	5.2	1.41	4.78	0	1.35	2.49	19	10	51	12	0	1
61486	1	41	1	1	171.5	77	26.18	3	1	1	0	0	167	97	83	5.4	3.39	4.85	0	1.26	2.65	18	27	59	102	1	2
61522	1	45	0	0	171.5	77.2	26.25	3	1	1	0	0	154	98	72	4.9	2.83	3.86	0	1.08	1.88	21	25	65	48	0	1
61536	1	50	0	0	163.5	65.6	24.54	2	1	0	0	0	138	84	85	5.4	0.92	4.48	0	1.66	2.25	48	63	74	46	0	1
61547	1	51	1	1	173.5	73.1	24.28	2	0	0	0	0	100	62	62	5.5	1.36	4.35	0	1.27	2.42	13	20	49	14	0	1
61579	1	45	0	0	171	64.4	22.02	2	0	0	0	1	116	74	65	6.2	1.16	5.63	0	1.51	3.56	19	20	81	18	0	1
61629	1	40	0	0	176	81.9	26.44	3	1	0	0	1	135	80	57	5.7	1.02	4.35	0	1.33	2.27	13	15	60	17	0	1
61446	1	45	0	0	174	69	22.79	2	0	0	0	0	116	66	64	5.2	1.08	4.41	0	1.26	2.33	26	29	110	14	0	1
61469	1	41	0	0	175	82.2	26.84	3	0	1	0	0	114	68	68	5	4.8	7.08	1	1.79	3.97	14	19	61	24	0	1
61578	1	47	1	1	173.5	85.6	28.44	3	1	0	0	0	130	80	70	5.4	0.88	4.67	0	1.22	2.93	32	47	80	91	0	1
61612	1	41	1	1	169	76.3	26.71	3	1	0	0	0	133	75	65	4.6	1.64	5.16	0	1.27	3.16	22	42	73	25	0	1
61639	1	39	1	2	172	83.7	28.29	3	1	0	0	0	134	82	79	4.9	0.85	4.63	0	1.22	2.65	23	36	43	29	0	1
61678	0	42	0	0	156.5	57.4	23.44	2	0	0	0	0	100	70	74	4.8	1.3	6.6	1	1.67	3.55	22	26	44	31	0	1
62273	0	36	0	0	162.5	61.6	23.33	2	0	0	0	0	120	80	77	4.6	1.14	4.68	0	1.38	2.58	18	18	40	24	0	1
62550	1	38	0	0	169	55	19.26	2	1	0	0	0	133	87	83	5.1	0.83	5.66	0	1.65	2.97	23	19	65	21	0	1
62573	0	32	0	0	153	51.6	22.04	2	0	0	0	0	120	80	74	4.8	0.47	4.48	0	1.94	1.67	21	18	47	11	0	1
61975	0	33	0	0	156	58.8	24.16	2	0	0	0	0	110	78	87	4.9	0.67	4.92	0	1.77	2.4	17	15	52	16	0	1
61976	0	35	0	0	163.5	54.3	20.31	2	0	0	0	0	100	70	72	4.3	0.62	5.14	0	1.96	2.29	27	34	43	12	0	1
61994	1	33	0	0	174	71	23.45	2	1	0	0	0	140	81	68	5.1	1.02	3.84	0	1.23	1.68	19	27	67	16	0	1
62093	1	24	0	0	171	51	17.44	1	1	0	0	0	124	85	81	4.9	0.65	3.55	0	1.47	1.69	27	29	97	13	0	1
56775	0	34	0	0	158.5	65.4	26.03	3	0	0	0	0	100	70	64	4.3	0.7	6.27	1	1.52	4.61	19	22	67	19	0	1
56943	1	32	0	0	171.5	74	25.16	3	1	0	0	0	143	89	92	4.8	1.49	3.57	0	1.45	1.58	16	25	74	29	0	1
57241	0	38	0	0	151	53.8	23.6	2	0	0	0	0	112	70	79	5.2	0.63	4.7	0	2.1	2.29	20	17	47	21	0	1
61563	1	56	0	0	171	65.5	22.4	2	0	0	0	0	117	62	66	4.2	1.07	5.1	0	1.56	3.01	33	52	61	41	0	1
61581	1	49	1	1	171	80.9	27.67	3	1	0	0	0	148	108	78	5.1	1.56	5.13	0	1.62	2.87	23	22	82	103	0	1
61588	1	58	1	1	174	65	21.47	2	0	0	0	1	129	83	82	5.8	1.38	5.09	0	1.48	2.85	16	22	46	21	0	1
61595	0	48	0	0	168	61.8	21.9	2	0	0	0	0	100	70	67	4.4	0.56	4.17	0	1.71	1.74	18	13	55	9	0	1
61606	0	42	0	0	165	63.9	23.47	2	0	0	0	1	120	80	83	5.7	0.82	4.09	0	1.3	1.94	18	15	48	12	0	1
61638	1	38	0	0	171.5	72.7	24.72	2	0	0	0	0	111	61	86	5.2	0.88	3.81	0	1.26	2.06	18	20	92	9	0	1
61663	0	48	0	0	159	62	24.52	2	0	0	1	0	126	84	71	5.1	1.06	4.81	0	1.14	2.95	22	33	53	13	0	1
61785	0	37	0	0	161	57.8	22.3	2	0	0	0	0	110	70	72	4.2	0.75	4.25	0	1.54	1.92	19	13	57	16	0	1
61817	0	39	0	0	166	67	24.31	2	0	0	0	0	120	80	63	5.2	0.75	5.18	0	1.6	3.05	15	7	43	11	0	1
61832	1	46	0	0	173.5	81.2	26.97	3	0	0	0	0	128	76	64	4.8	1.53	5.52	0	1.49	3.02	19	24	59	17	0	1
61936	1	37	0	0	171	62	21.2	2	0	0	0	0	86	58	74	4.4	1.26	5.69	0	1.2	3.16	24	29	67	21	0	1
61966	1	33	1	1	179	102	31.83	4	1	1	0	0	129	93	89	4.7	1.85	4.29	0	1.2	2.51	29	21	90	32	0	1
61983	1	33	1	2	175	88	28.73	3	1	1	0	0	139	88	54	4.6	3.26	5.24	0	1.16	3.03	33	62	66	35	0	1
61567	1	55	0	0	173	70.5	23.56	2	0	0	0	0	112	66	72	4.8	0.68	4.63	0	1.35	2.55	17	26	52	9	0	1
61599	1	39	0	0	165	58.8	21.6	2	0	1	0	0	118	72	74	4.8	1.72	4.36	0	1.42	2.05	23	32	72	12	0	1
61601	1	54	0	0	171.5	73.2	24.89	2	0	0	0	0	104	54	57	4.5	1.56	5.02	0	1.21	3.09	15	13	58	19	0	1
61635	1	40	1	1	171.5	77.4	26.32	3	0	0	0	0	126	73	79	4.5	1.51	5.22	0	1.19	3.04	22	26	50	23	0	1
61652	1	37	0	0	174.5	67.2	22.07	2	0	1	0	0	113	72	84	5.4	2.07	4.89	0	1.51	2.64	14	14	53	25	0	1
61669	1	52	1	1	172.5	74.2	24.94	2	1	0	0	1	132	94	82	5.7	0.95	4.42	0	1.31	2.3	24	33	69	20	0	1
61054	1	58	0	0	164	66.7	24.8	2	0	0	0	0	116	72	68	4.3	1.05	5.23	0	1.14	3.29	19	23	75	22	0	1
61111	1	54	0	0	170	86	29.76	3	1	1	0	0	137	85	78	5.2	2.27	4.96	0	1.05	3.21	48	102	59	39	0	1
61154	1	42	1	1	167	71.2	25.53	3	0	1	0	0	115	77	66	4.9	4.18	5.26	0	1.25	2.81	22	19	80	21	0	1
61211	1	44	0	0	168.5	68	23.95	2	0	1	0	0	120	70	81	4.7	2.26	5.14	0	1.09	2.74	21	43	80	15	0	1
61247	1	41	0	0	171.5	57.2	19.45	2	0	0	0	0	128	77	61	4.8	0.68	3.73	0	1.5	1.41	16	12	60	15	0	1
57394	0	37	0	0	160	59	23.05	2	1	1	0	0	140	90	75	4.7	3.84	3.55	0	1.42	1.52	16	22	67	13	0	1
57451	1	44	0	0	170	64.1	22.18	2	0	1	0	0	121	74	74	5.1	2.2	4.67	0	1.13	2.73	47	76	55	36	0	1
57501	1	39	0	0	187	87.8	25.11	3	0	0	0	0	116	64	64	4.6	0.9	4.39	0	1.65	2.36	20	16	62	68	0	1
57669	0	44	0	0	162.5	61.7	23.37	2	0	0	1	1	110	70	70	6.7	0.9	4.35	0	1.12	2.34	18	25	71	16	0	1
62150	1	26	0	0	168	67.9	24.06	2	0	0	0	0	120	78	66	4.1	0.88	4.59	0	1.24	2.37	22	33	46	15	0	1
62284	1	23	0	0	176	68.4	22.08	2	0	1	0	0	115	70	67	4.9	2.49	3.63	0	1.12	1.45	16	21	64	20	0	1
62537	0	42	0	0	169	60.8	21.29	2	0	0	1	0	110	70	72	5	1.03	2.91	0	0.94	1.37	19	14	34	13	0	1
61727	1	38	0	0	162.5	62.6	23.71	2	1	1	0	0	140	93	79	4.5	2.21	3.93	0	1.09	1.77	25	28	50	11	0	1
61759	1	38	1	1	176.5	82.2	26.39	3	1	0	0	0	141	96	63	5	1.2	5.32	0	1.25	3.15	20	18	66	25	0	1
61791	1	37	0	0	169.5	73.1	25.44	3	0	0	0	0	118	75	71	4.7	0.79	4.04	0	1.29	1.9	19	22	43	21	0	1
61792	1	38	0	0	171	61	20.86	2	0	0	0	0	106	67	70	4.1	0.92	4.63	0	1.45	2.32	16	22	61	16	0	1
61827	1	36	0	0	177	79	25.22	3	0	1	0	0	125	75	78	5.2	1.9	5.25	0	1.27	2.9	14	17	71	19	0	1
61860	1	41	0	0	168	68.4	24.23	2	1	0	0	0	141	84	94	4.4	0.91	4.78	0	1.23	2.21	20	21	79	19	0	1
61877	1	37	1	1	174.5	85	27.91	3	0	1	1	0	126	80	85	4.9	5.18	3.76	0	0.99	1.29	68	134	84	252	0	1
57386	1	58	1	1	176	75.2	24.28	2	1	1	0	1	132	85	86	5.6	1.82	4.58	0	1.5	2.66	16	18	51	24	0	1
57475	1	20	1	1	169.5	66.6	23.18	2	0	0	0	0	127	74	98	5.3	0.98	3.64	0	1.3	1.89	25	29	76	22	0	1
57516	0	59	0	0	158	61.8	24.76	2	0	1	0	0	120	80	74	5.3	1.75	4.42	0	1.71	2.2	21	20	49	12	0	1
57645	1	44	1	1	171	77.9	26.64	3	0	0	0	1	117	79	74	8.4	0.87	4.31	0	1.22	2.56	95	154	87	60	0	1
57686	1	41	1	1	172.5	77	25.88	3	0	1	1	1	128	75	72	6.3	2.06	3.68	0	0.8	1.97	28	47	76	32	0	1
57718	0	38	0	0	160	57.4	22.42	2	0	1	0	1	100	66	75	6.4	2.05	5.25	0	1.38	3.22	18	20	49	15	0	1
57388	1	58	0	0	163	64.5	24.28	2	1	0	0	0	148	78	68	5.2	0.96	4.72	0	2.15	2.52	24	18	86	20	0	1
57390	1	49	0	0	176.5	76.8	24.65	2	1	0	1	0	133	83	79	4.7	0.66	3.49	0	0.97	1.76	21	24	49	15	0	1
57439	1	42	0	0	170.5	65	22.36	2	0	0	0	0	105	72	74	4.8	1.2	4.41	0	1.8	2.44	18	14	68	17	0	1
57488	1	44	0	0	171.5	79.2	26.93	3	0	0	0	0	125	70	68	5.1	1.63	4.95	0	1.87	2.72	23	23	49	16	0	1
62641	1	42	0	0	171	67.1	22.95	2	0	0	0	0	112	65	79	5.3	0.63	3.6	0	1.37	1.61	14	13	75	22	0	1
62650	1	38	0	0	184	76.3	22.54	2	0	0	0	0	125	84	81	5	1.4	4.75	0	1.35	2.68	16	16	76	70	0	1
62784	1	34	0	0	171	62	21.2	2	0	0	0	0	118	68	71	5.5	0.91	4.19	0	1.25	2.27	25	36	44	12	0	1
58456	1	22	1	2	167	101	36.21	4	0	0	1	1	96	63	80	5.7	1.68	4.38	0	0.87	2.74	25	39	91	67	0	1
58779	0	45	0	0	157	53.1	21.54	2	0	0	0	0	110	76	75	4.9	0.52	4.61	0	1.83	2.16	27	34	97	18	0	1
58813	1	34	1	1	173.5	70.4	23.39	2	0	0	1	1	109	77	72	5.6	1.38	4.7	0	0.99	2.75	17	15	49	24	0	1
58822	1	47	0	0	174.5	84.4	27.72	3	0	1	1	0	123	62	54	5	2.62	4.72	0	0.92	2.38	24	37	76	22	0	1
56903	0	23	0	0	165.5	54.6	19.93	2	0	0	0	0	100	66	71	4.9	0.87	4.89	0	2.15	2.45	14	11	48	12	0	1
56939	1	30	0	0	180	59.9	18.49	1	1	0	0	0	135	78	115	4.9	0.65	3.72	0	1.79	1.69	28	20	53	21	0	1
57239	1	38	0	0	172	76.7	25.93	3	0	1	0	0	121	79	89	5.2	2.28	5.13	0	1.59	3.21	25	48	71	32	0	1
57271	1	48	0	0	172	83	28.06	3	1	0	0	1	133	84	64	5.6	1.35	5.47	0	2.02	2.97	32	37	50	25	0	1
57373	0	55	1	1	163	57.8	21.75	2	0	1	0	1	110	66	74	6.1	2.17	6	0	2.02	3.6	28	35	79	21	1	2
61844	1	38	0	0	169	69.4	24.3	2	0	0	0	0	99	65	65	4.8	0.64	5.03	0	1.78	2.42	17	23	56	17	0	1
61861	1	38	0	0	174.5	67.4	22.13	2	0	0	1	0	128	72	82	5.1	1.55	4.96	0	1.01	3.11	17	14	140	13	0	1
61876	1	34	0	0	166.5	61.8	22.29	2	0	1	1	0	110	70	76	4.9	3	4.63	0	0.98	2.81	21	27	73	63	0	1
61911	0	38	0	0	160	54.2	21.17	2	0	0	0	0	100	70	69	4.9	0.46	4.28	0	1.65	1.94	21	23	40	9	0	1
61925	1	35	0	0	174.5	62.8	20.62	2	0	0	0	0	117	67	66	4.6	1.06	4.32	0	1.61	1.89	17	13	53	23	0	1
62043	1	27	0	0	165	64.3	23.62	2	0	0	0	0	123	82	89	5	1.56	3.8	0	1.41	1.76	25	35	65	23	0	1
61636	1	44	0	0	168	66.6	23.6	2	1	1	0	0	131	84	75	4.7	2.87	5.03	0	1.14	2.98	21	28	77	42	0	1
61654	1	37	0	0	175	80.4	26.25	3	0	1	0	0	120	74	79	4.7	2.07	3.43	0	1.06	1.91	23	35	57	25	0	1
61697	1	40	0	0	166	61.6	22.35	2	0	0	0	0	103	66	87	4.8	1.16	3.59	0	1.31	1.54	18	20	82	14	0	1
61704	1	43	1	1	171.5	81.1	27.57	3	1	1	0	0	138	87	73	5.5	2.46	4.73	0	1.37	2.49	24	24	69	39	0	1
61711	1	41	1	1	168	62.9	22.29	2	0	1	0	1	122	79	86	5.6	2.56	6.8	1	1.5	3.57	26	54	77	32	0	1
61722	0	40	0	0	163.5	59.2	22.15	2	0	0	0	0	100	70	70	4.8	1.05	4.83	0	1.4	2.46	16	14	46	16	0	1
61761	1	38	0	0	180	72	22.22	2	0	1	0	0	115	67	64	5	1.89	5.67	0	1.27	2.86	18	27	75	22	0	1
61765	1	38	1	1	167	69.4	24.88	2	0	1	0	0	112	75	74	5.2	2.06	6.89	1	1.36	4.61	23	56	81	32	0	1
56699	1	56	0	0	177.5	84.7	26.88	3	1	0	0	0	144	89	90	4.9	0.94	4.11	0	1.09	2.39	22	31	99	19	0	1
56742	0	25	0	0	155	45.4	18.9	2	0	0	0	0	100	70	81	4.7	0.69	3.94	0	2	1.51	19	6	51	11	0	1
56781	0	32	0	0	160	58.5	22.85	2	0	0	0	0	100	70	70	4.9	1.31	4.56	0	1.94	2.44	18	6	58	16	0	1
56799	0	25	0	0	170.5	62.9	21.64	2	0	0	0	0	110	80	74	5.3	0.82	5.03	0	2.15	2.78	27	31	51	12	0	1
56885	1	30	1	2	176.5	86.7	27.83	3	1	0	0	0	123	89	92	5.4	1.64	5.02	0	1.24	3.25	47	99	94	53	0	1
56910	1	24	0	0	176.5	53.8	17.27	1	1	0	0	0	118	91	94	4.7	0.63	4.38	0	1.99	1.68	52	117	80	16	0	1
57459	0	52	0	0	151	55	24.12	2	0	1	0	1	120	80	72	6.4	1.89	5.25	0	1.83	3.12	16	20	39	19	0	1
61680	0	41	0	0	149.5	58.8	26.31	3	1	1	0	1	170	120	78	5.6	2.16	7.19	1	1.66	4.43	29	36	62	21	0	1
61703	1	42	1	2	169.5	71.2	24.78	2	0	1	0	1	116	77	72	5.7	2.02	4.68	0	1.21	2.47	15	29	58	44	0	1
61705	1	42	0	0	166	75.6	27.44	3	1	0	0	0	141	91	76	4.8	1.64	5.74	0	1.37	3.58	41	103	81	62	0	1
61746	0	37	0	0	157	50.7	20.57	2	1	0	0	0	130	80	85	5	0.55	4.31	0	1.46	2.15	20	24	44	14	0	1
61773	0	37	0	0	158	53.2	21.31	2	0	0	1	0	100	70	74	4.5	0.6	3.9	0	1.29	1.88	19	14	54	12	0	1
61837	1	43	1	1	167	75	26.89	3	1	1	0	0	131	84	69	5.3	2.56	6.21	1	1.38	3.97	21	42	41	105	0	1
61839	0	39	0	0	165.5	67.4	24.61	2	0	0	0	0	110	70	70	5.2	1.39	5.12	0	1.31	3.18	22	18	40	14	0	1
62068	1	26	0	0	176	65.4	21.11	2	1	0	0	0	145	74	75	4.9	1.4	3.47	0	1.25	1.76	23	13	83	21	0	1
62102	0	33	0	0	159	47.9	18.95	2	0	0	0	0	86	56	78	5.2	0.86	5.18	0	1.84	2.36	16	13	71	12	0	1
62151	0	52	1	1	148.5	68	30.84	4	1	0	0	1	136	86	74	6.4	1.07	5.34	0	1.54	2.9	42	63	112	34	0	1
62219	1	61	1	1	166.5	79.2	28.57	3	1	0	0	0	134	84	71	5.3	1.6	5.14	0	1.23	3.07	19	26	53	25	0	1
57401	1	33	0	0	176	85.4	27.57	3	0	0	0	0	109	66	68	5.4	1.63	5.24	0	1.3	2.84	15	17	63	30	0	1
57458	1	26	0	0	169.5	56.1	19.53	2	1	0	0	0	135	80	92	5	0.98	4.07	0	2.12	1.62	56	151	76	40	0	1
61279	1	42	0	0	171	72.6	24.83	2	0	0	0	0	122	68	64	5.2	1.4	3.96	0	1.25	2.02	22	27	59	16	0	1
61304	1	42	1	1	174	82.8	27.35	3	0	0	0	0	117	81	81	5	1.25	5.29	0	1.51	2.43	15	22	73	14	0	1
61311	0	41	0	0	161	59.9	23.11	2	0	0	0	0	100	70	72	4.6	0.86	6.82	1	2.29	3.39	18	20	46	14	0	1
61336	1	41	1	1	170	76	26.3	3	0	1	0	0	118	68	75	4.8	3.53	4.69	0	1.16	2.54	23	35	58	24	0	1
61361	0	49	0	0	165	73.1	26.85	3	0	0	0	1	120	80	76	5.9	1.19	5.57	0	1.34	3.34	29	35	80	25	0	1
61735	1	57	0	0	171.5	75.8	25.77	3	0	0	0	1	116	69	90	6.4	1.06	4.98	0	1.5	3.04	22	34	70	69	0	1
61750	1	37	0	0	174	67.2	22.2	2	0	1	0	0	99	60	72	4.9	1.98	5.81	0	1.48	3.51	26	25	75	44	0	1
61784	1	39	0	0	165.5	69.5	25.37	3	0	0	0	0	121	69	70	5.5	1.24	4.74	0	1.13	2.62	18	21	61	32	0	1
61850	1	34	0	0	170	74.4	25.74	3	0	1	0	0	113	79	67	4.9	1.71	4.71	0	1.25	2.59	17	32	50	47	0	1
61852	1	38	1	1	176.5	91.7	29.44	3	0	0	0	0	120	78	87	4.8	1.17	3.98	0	1.12	1.93	26	47	77	52	0	1
61706	1	40	0	0	172	61	20.62	2	0	0	0	0	116	77	59	4.9	1.21	4.55	0	1.58	2.39	28	40	50	13	0	1
61731	1	40	1	2	177.5	99	31.42	4	1	0	0	1	149	99	81	7.3	1.43	5.79	0	1.36	3.69	36	95	61	68	0	1
61745	1	40	0	0	176	69.2	22.34	2	0	0	0	0	104	64	70	4.2	0.8	4.15	0	1.5	1.72	30	47	48	20	0	1
61763	1	53	0	0	165	70	25.71	3	1	1	0	1	125	87	79	7	2	6.18	1	1.14	3.33	20	33	95	111	0	1
61788	0	37	0	0	163	57	21.45	2	0	0	0	0	100	70	76	4.7	1.04	4.21	0	1.56	1.98	14	10	50	11	0	1
61820	1	42	0	0	166	66.6	24.17	2	0	1	0	0	123	78	71	5.3	1.95	3.96	0	1.26	1.86	22	24	86	17	0	1
61863	1	40	0	0	172.5	79.4	26.68	3	0	0	0	0	115	68	72	5	1.14	4.03	0	1.23	1.77	18	32	52	53	0	1
61870	0	35	0	0	157.5	51.6	20.8	2	0	0	1	0	96	64	73	4.7	0.79	3.86	0	1.26	1.67	20	23	42	15	0	1
62552	0	36	0	0	158	55	22.03	2	0	0	0	0	110	70	76	5.1	0.44	3.46	0	1.39	1.38	17	11	55	11	0	1
62652	1	42	1	1	173.5	71.2	23.65	2	1	1	0	0	113	88	86	5.4	4.54	5.1	0	1.24	2.35	18	20	48	35	0	1
62686	0	24	0	0	168	44.7	15.84	1	0	0	0	0	100	70	70	5.1	0.43	5.12	0	1.72	2.65	15	9	50	17	0	1
62805	0	41	0	0	157.5	54.2	21.85	2	0	0	0	0	100	70	85	4.4	1.63	4.95	0	1.48	2.62	21	21	61	32	0	1
61928	1	39	1	1	168.5	66.9	23.56	2	0	0	0	1	124	76	84	5.9	1.65	4.52	0	1.42	2.4	22	50	60	45	0	1
61942	1	38	0	0	169	72.6	25.42	3	1	0	1	0	138	91	87	5.2	0.88	3.91	0	0.99	2.18	29	28	74	31	0	1
61959	0	36	0	0	161	54.3	20.95	2	0	0	0	0	100	70	70	4.4	0.44	4.14	0	1.99	1.55	16	9	62	11	0	1
61978	1	36	1	2	167	96	34.42	4	0	1	1	1	120	78	82	6.3	2.27	4.53	0	1.01	2.65	16	29	51	43	0	1
61992	1	34	1	1	176	93	30.02	4	1	1	1	1	135	67	72	5.9	3.96	3.83	0	0.94	1.95	24	56	52	33	0	1
62028	1	31	0	0	169	63	22.06	2	0	0	0	0	120	71	65	4.8	1.44	5.18	0	1.16	2.95	22	27	95	17	0	1
62045	1	26	0	0	176	69	22.28	2	1	0	0	0	145	78	70	4.9	0.54	4.59	0	1.3	2.57	18	13	57	11	0	1
62850	0	41	1	1	163.5	73.4	27.46	3	1	0	1	1	146	106	78	5.8	1.58	4.14	0	1.17	2.38	15	21	63	14	0	1
62873	0	42	0	0	160	55.4	21.64	2	0	0	0	0	110	80	72	4.8	0.88	4.44	0	1.4	2.3	20	10	58	11	0	1
62975	0	42	0	0	162	60.3	22.98	2	0	0	0	0	106	72	76	4.9	0.37	4.88	0	1.69	2.51	17	14	45	11	0	1
63077	1	47	0	0	186	91	26.3	3	0	1	0	0	112	75	85	4.4	2.09	4.13	0	1.25	2.02	20	19	53	28	0	1
63107	1	37	0	0	169	74.1	25.94	3	0	0	0	0	115	76	74	4.9	0.67	7.22	1	1.72	4.58	25	46	67	28	0	1
63109	0	51	0	0	157	54.6	22.15	2	1	0	0	0	130	80	77	5.2	0.67	5.82	0	2.11	2.69	19	13	75	12	0	1
62061	1	25	0	0	171.5	72.5	24.65	2	0	0	0	0	113	70	74	4.6	1.14	3.97	0	1.5	1.81	72	44	83	19	0	1
62094	0	23	0	0	156	44.3	18.2	1	0	0	0	0	100	70	67	4.8	0.51	4.61	0	1.67	2.07	20	14	57	14	0	1
62125	1	32	1	2	171	87.2	29.82	3	0	1	0	0	117	73	89	5.4	4.88	4.14	0	1.13	2.02	27	51	72	40	0	1
62161	1	62	1	1	173.5	82.4	27.37	3	0	0	0	1	129	78	76	6.9	0.67	5.36	0	1.56	2.86	24	28	62	67	0	1
57370	0	64	0	0	153.5	53.2	22.58	2	0	1	0	0	120	80	69	5.3	1.9	4.39	0	1.51	2.17	18	10	65	13	0	1
57472	0	23	0	0	169.5	47.6	16.57	1	0	0	0	0	96	64	68	4.7	0.7	3.54	0	2.14	1.1	17	13	42	10	0	1
57521	1	33	0	0	166	53.3	19.34	2	0	0	0	0	127	83	83	4.8	0.38	3.87	0	2.04	1.64	29	18	64	9	0	1
57655	1	49	1	1	163	68	25.59	3	1	1	0	0	134	83	92	5.5	8.62	5.92	0	1.21	2.23	27	49	98	61	0	1
57674	1	21	0	0	164	58.8	21.86	2	0	0	0	0	128	79	70	5.2	0.95	5.26	0	1.09	3.07	31	21	79	17	0	1
57493	1	50	0	0	168	65.9	23.35	2	1	1	0	1	145	97	80	5.6	1.78	4.55	0	1.78	2.33	22	17	62	15	0	1
57804	0	37	0	0	161	53.9	20.79	2	0	0	0	1	116	70	69	5.8	1.23	4.89	0	1.49	2.91	28	30	50	20	0	1
61847	1	42	0	0	174.5	77.2	25.35	3	0	0	1	0	102	71	93	5	0.7	4.18	0	0.9	2.33	17	12	90	11	0	1
61854	1	42	0	0	171	81.8	27.97	3	0	0	0	0	117	63	76	4.9	0.87	4.27	0	1.65	1.93	39	28	63	14	0	1
61872	0	38	0	0	159	57	22.55	2	0	1	1	0	100	70	72	4.9	4.5	5.14	0	1.14	2.09	22	18	84	16	0	1
61897	1	35	1	2	172	85	28.73	3	1	1	0	0	133	75	87	5.2	3.07	5.01	0	1.35	2.72	25	52	61	134	0	1
61904	1	39	0	0	174	76	25.1	3	0	0	0	0	128	82	73	5.4	1.23	4.65	0	1.11	2.88	21	21	57	22	0	1
61929	1	37	0	0	167	61.2	21.94	2	1	0	0	0	136	86	86	5.4	0.84	3.89	0	1.18	1.95	21	37	61	21	0	1
62015	0	32	0	0	159.5	61.2	24.06	2	1	0	0	0	136	88	69	5.1	0.58	3.77	0	1.62	2.02	12	15	73	16	0	1
61878	1	35	0	0	183.5	93.7	27.83	3	0	0	0	0	123	67	72	5.2	0.86	5.9	0	1.63	3.28	23	26	82	17	0	1
61907	1	36	0	0	166.5	65.8	23.74	2	0	0	0	0	109	78	80	5	1.28	5.8	0	1.75	3.01	20	43	71	51	0	1
61982	1	32	1	1	171.5	82.8	28.15	3	1	1	0	1	131	74	80	11.5	4.51	6.55	1	1.44	3.89	21	26	72	40	0	1
57312	0	36	0	0	153.5	51.6	21.9	2	0	0	0	0	100	70	92	5.5	1.04	4	0	1.61	2.03	16	11	49	9	0	1
57315	1	41	1	1	183.5	72.8	21.62	2	0	0	0	0	116	76	84	5.3	1.64	5.49	0	1.55	3.6	25	34	70	37	0	1
57398	1	33	0	0	177	81.5	26.01	3	1	0	0	0	137	88	85	5	1.19	6.09	1	1.83	3.31	14	7	89	20	0	1
56924	1	20	0	0	171.5	64.4	21.9	2	0	0	0	0	120	60	68	4.6	0.76	6.02	1	1.3	4.12	32	46	45	26	0	1
56935	1	50	0	0	171	75.8	25.92	3	1	1	0	0	143	100	73	5.1	5.92	6	0	1.18	2.9	17	24	85	56	0	1
57249	0	49	0	0	159.5	72.2	28.38	3	1	0	0	0	134	100	80	5.1	1.67	5.21	0	1.68	3.13	23	20	99	19	0	1
57317	1	26	0	0	175	55.2	18.02	1	0	0	0	0	118	72	90	5.4	0.88	4.25	0	2.24	1.93	20	16	81	11	0	1
62451	1	62	0	0	171	68.4	23.39	2	1	0	0	1	134	78	67	7.2	0.93	3.65	0	1.23	1.68	30	47	69	33	0	1
62453	1	43	1	1	174	89.2	29.46	3	1	1	0	0	141	92	81	5.4	1.79	5.21	0	1.26	2.84	33	62	78	30	0	1
62653	0	40	0	0	162.5	54.6	20.68	2	0	1	0	0	110	80	91	4.9	1.7	5.48	0	1.56	3.17	23	30	79	50	0	1
62655	0	36	0	0	159.5	68.6	26.97	3	0	0	0	0	100	70	73	5.1	1.37	5.2	0	1.54	2.69	20	29	71	30	0	1
62668	0	59	0	0	149	46	20.72	2	0	0	0	0	100	70	76	4.9	0.77	6.41	1	1.98	3.42	24	18	57	15	0	1
62670	0	40	0	0	155	60.2	25.06	3	0	1	0	0	110	72	60	5.1	3.32	7.11	1	1.77	3.96	20	18	65	17	0	1
62702	1	42	0	0	184	89	26.29	3	1	1	0	0	147	82	75	4.7	1.88	5.74	0	1.75	3.32	24	28	68	52	0	1
57662	1	49	0	0	171.5	61.6	20.94	2	0	0	0	1	128	72	51	5.8	0.54	5.38	0	1.42	3.05	26	36	85	25	0	1
57719	1	49	0	0	169	63.8	22.34	2	0	0	0	1	117	75	72	6.4	1.27	4.51	0	1.18	2.64	42	67	62	18	0	1
57751	1	45	1	2	173	102	34.08	4	1	1	0	0	136	89	69	5	4.12	6.2	1	1.38	2.98	22	29	61	41	0	1
57837	1	46	0	0	178.5	73.8	23.16	2	0	1	0	1	122	83	85	6.6	1.74	6.29	1	1.32	3.32	24	29	83	25	0	1
57848	0	21	1	1	173.5	98.2	32.62	4	1	1	0	1	120	86	85	5.7	2.51	4.85	0	1.45	2.68	20	19	58	12	0	1
57865	1	42	0	0	168	65.4	23.17	2	0	0	0	1	112	73	70	6.7	1.49	4.75	0	1.31	2.5	30	30	87	24	0	1
61379	0	44	0	0	151.5	49.2	21.44	2	0	0	0	0	110	70	66	4.6	1.22	5.64	0	1.51	3.4	24	16	50	13	0	1
61436	1	38	0	0	180	83.2	25.68	3	0	0	0	0	113	61	57	5.2	0.97	4.65	0	1.57	1.99	19	24	104	28	0	1
61572	1	49	1	1	171	74	25.31	3	1	0	0	1	135	72	100	6.1	0.66	5.46	0	1.69	2.82	29	50	102	216	0	1
61586	1	45	1	1	171	71	24.28	2	1	0	0	1	133	93	78	6	0.7	5.79	0	2.21	3.35	45	71	60	111	0	1
61604	0	39	0	0	152	49.3	21.34	2	0	0	0	0	110	70	75	4.6	0.61	5.33	0	2.21	2.01	25	44	38	18	0	1
61679	0	40	0	0	159	61.1	24.17	2	0	0	0	0	110	76	74	5.1	0.57	4.32	0	1.82	1.64	21	19	51	9	0	1
61901	0	37	0	0	162	64	24.39	2	0	1	0	0	100	70	77	5.5	2.7	5.73	0	1.52	3.4	14	7	48	15	0	1
61916	1	34	1	2	171	89.5	30.61	4	1	1	0	1	134	100	98	5.9	1.97	5.54	0	1.55	2.88	23	50	71	68	0	1
61933	1	43	0	0	168.5	62.6	22.05	2	1	0	0	0	133	70	73	4.8	0.46	4.45	0	1.88	1.95	20	20	67	16	0	1
61952	0	37	0	0	157	53	21.5	2	0	0	0	0	100	70	72	4.8	1.07	5.45	0	1.87	2.66	15	10	45	13	0	1
61986	0	33	0	0	166	65.2	23.66	2	0	0	1	0	100	70	82	4.7	0.78	3.18	0	1.15	1.37	25	23	45	10	0	1
62003	1	34	1	1	171	72	24.62	2	1	1	0	1	135	78	101	5.8	2.96	5.7	0	1.29	3.46	19	33	90	23	0	1
57649	1	19	1	1	173.5	84.4	28.04	3	1	1	0	0	136	75	82	4.5	1.89	6.18	1	1.55	3.88	42	100	55	47	0	1
57664	1	22	0	0	183.5	77.5	23.02	2	0	0	1	0	116	65	87	5.5	0.81	4.38	0	0.99	2.38	15	21	71	52	0	1
57682	1	23	1	1	171.5	86.2	29.31	3	1	1	1	0	123	88	58	5.2	1.89	5.98	0	0.97	3.36	19	64	68	31	0	1
61906	1	35	0	0	171	70	23.94	2	0	0	0	0	117	63	73	3.8	0.68	4.01	0	1.79	1.32	25	23	53	16	0	1
61995	1	33	0	0	171	79	27.02	3	0	1	0	0	122	81	77	5.4	1.83	5.55	0	1.69	2.95	21	41	61	23	0	1
62006	1	40	1	1	171	68.5	23.43	2	1	1	0	0	130	81	96	4.9	1.9	4.83	0	1.3	2.54	20	40	68	27	0	1
62049	1	27	0	0	187	81.4	23.28	2	0	0	0	0	124	67	70	4.4	0.75	4.02	0	1.18	2.07	21	32	60	32	0	1
62056	1	29	0	0	176	83	26.79	3	0	0	0	1	122	79	73	6.1	0.69	5.21	0	1.38	2.96	23	37	52	24	0	1
62188	0	23	0	0	155	44	18.31	1	0	0	0	0	100	70	63	4.6	0.77	4.22	0	1.33	2.08	19	15	49	19	0	1
63069	1	42	0	0	158.5	63.2	25.16	3	0	0	0	0	113	61	76	4.7	1.51	4.9	0	1.65	2.74	17	19	64	20	0	1
57712	0	49	1	1	151	75.4	33.07	4	1	1	0	1	136	84	82	6.9	1.95	4.66	0	1.39	2.64	27	38	69	69	0	1
57726	1	49	0	0	171.5	67.2	22.85	2	1	0	1	1	151	85	97	6.6	1.11	3.12	0	0.97	1.61	20	26	137	25	1	2
57862	0	36	0	0	152	43.2	18.7	2	0	0	0	1	100	70	84	6.4	1.26	4.66	0	1.36	2.57	17	10	49	14	0	1
57919	1	23	0	0	185	81.7	23.87	2	0	0	0	0	116	71	98	5.2	1.04	3.88	0	1.2	1.78	16	9	65	15	0	1
62060	1	25	1	1	170.5	82.4	28.35	3	1	1	0	0	150	92	81	4.9	2.2	3.68	0	1.2	1.62	21	23	51	14	0	1
62078	1	25	0	0	173.5	69.9	23.22	2	1	1	0	0	130	72	75	4.7	2.02	5.76	0	1.92	2.93	31	47	74	22	0	1
62109	1	34	1	2	176.5	101.2	32.49	4	0	1	0	0	116	66	77	5.5	7.01	4.62	0	1.06	1.76	17	36	71	34	0	1
62210	1	49	0	0	171	70.5	24.11	2	1	0	1	0	146	101	89	4.7	1.27	3.35	0	0.99	1.74	19	18	69	38	0	1
62227	0	62	0	0	151	58	25.44	3	0	0	0	0	120	80	64	5.2	1.25	5.47	0	1.46	3.1	31	27	122	21	0	1
62193	0	43	0	0	160	57.3	22.38	2	0	0	0	1	106	74	80	5.8	1.3	5.59	0	1.72	3.02	16	13	41	12	1	2
62311	0	45	0	0	156	62	25.48	3	0	1	0	0	100	70	72	5.3	2.34	6.74	1	1.44	3.75	13	15	39	16	0	1
62362	0	49	0	0	168	63	22.32	2	1	0	0	1	160	100	62	6	0.56	5.39	0	1.92	2.33	19	13	54	11	0	1
62529	1	44	0	0	177	95.6	30.51	4	0	0	0	0	126	78	78	4.9	1.3	5	0	1.49	2.71	18	30	74	37	0	1
62576	0	49	1	1	158	75	30.04	4	0	0	1	0	120	76	74	5.2	1.37	3.58	0	1.23	1.59	22	31	58	26	0	1
57405	0	41	0	0	166	76	27.58	3	0	0	0	0	110	80	78	5.4	0.61	4.59	0	2.14	2.21	16	11	69	10	0	1
57424	1	18	0	0	171.5	58.3	19.82	2	0	0	0	0	121	74	88	4.5	0.64	4.12	0	1.6	2.2	18	15	90	19	0	1
57454	1	44	0	0	175.5	69.2	22.47	2	0	1	0	0	120	72	67	5.4	1.93	5.21	0	1.78	2.81	22	21	39	67	0	1
57473	0	35	0	0	151	55.7	24.43	2	0	0	0	0	110	76	70	5.4	1.27	4.68	0	2.04	2.45	17	7	67	13	0	1
57571	1	36	0	0	169	68	23.81	2	0	0	0	1	120	73	65	5.7	1.59	5.8	0	1.66	3.46	20	19	90	20	0	1
62679	1	48	0	0	158	59.8	23.95	2	1	0	0	0	126	89	102	5.5	1.59	5.58	0	1.39	3.19	14	22	54	16	0	1
63241	0	25	0	0	167	55.2	19.79	2	0	0	0	0	100	70	77	4.6	0.44	3.49	0	1.82	1.4	16	14	56	12	0	1
63252	0	26	0	0	152	50.1	21.68	2	0	0	0	0	100	70	86	5.4	0.57	4.3	0	1.77	1.79	13	6	60	8	0	1
63316	0	37	0	0	154.5	47.7	19.98	2	0	0	0	0	100	70	78	5.5	1.14	5.56	0	1.59	3.01	20	18	46	14	0	1
63486	1	38	0	0	174	77	25.43	3	0	1	0	0	112	71	70	5.2	1.93	5.79	0	1.34	3.68	21	40	96	40	0	1
63509	1	38	0	0	170	68	23.53	2	0	0	1	0	95	56	50	4.8	0.33	2.26	0	0.67	1.16	24	26	69	12	0	1
62047	1	28	0	0	171.5	69	23.46	2	1	0	0	0	130	68	68	4.5	0.9	3.7	0	1.51	1.78	21	22	57	18	0	1
62072	0	39	0	0	165	58	21.3	2	0	0	0	0	100	70	72	4.2	0.67	4.54	0	2.07	1.59	23	17	65	14	0	1
62115	0	31	0	0	157.5	64.5	26	3	0	0	0	0	100	70	84	4.5	0.48	3.87	0	1.36	2.13	15	6	93	12	0	1
62147	1	23	0	0	173	54.7	18.28	1	0	0	0	0	111	72	76	4.5	1.02	4.16	0	1.87	1.95	17	13	74	15	0	1
62179	1	19	1	1	175.5	84.3	27.37	3	0	0	0	0	113	69	81	4.6	1.23	5.58	0	1.6	2.9	57	127	98	86	0	1
62012	1	33	0	0	171	77.4	26.47	3	0	0	0	0	128	78	82	5.1	0.89	4.87	0	1.32	2.6	23	34	56	23	0	1
62037	1	28	0	0	170	64.8	22.42	2	0	0	0	0	109	66	63	4.8	1.58	4.08	0	1.15	2.53	17	20	83	41	0	1
62071	1	27	0	0	169	51.3	17.96	1	0	0	0	0	106	58	69	4.8	1.05	4.68	0	1.55	2.61	33	52	47	26	0	1
62082	0	25	0	0	164	50.7	18.85	2	0	0	0	0	100	70	70	4.7	0.92	4.82	0	1.76	2.25	18	10	64	14	0	1
62139	1	23	0	0	171.5	86.8	29.51	3	1	0	1	0	138	79	88	5.3	0.63	2.51	0	0.89	1.09	20	23	69	17	0	1
62785	0	43	0	0	162	53.9	20.54	2	0	0	1	0	110	78	76	5.1	1.28	3.26	0	1.2	1.49	18	21	44	10	0	1
62819	0	37	0	0	168	64	22.68	2	0	0	0	0	104	70	72	5.1	1.19	3.95	0	1.3	1.89	12	11	37	10	0	1
63220	0	42	0	0	154	61.2	25.81	3	0	1	0	0	120	80	66	4.4	1.9	5.01	0	1.73	2.49	21	32	42	24	0	1
63237	0	44	0	0	155	55	22.89	2	0	0	1	0	110	74	72	5.2	1.28	3.7	0	1.25	1.99	22	35	67	47	0	1
63239	0	25	0	0	154	55.4	23.36	2	0	0	0	0	90	60	75	4.6	1	4.34	0	1.58	2.09	16	12	47	13	0	1
62052	1	26	0	0	171.5	60.3	20.5	2	0	0	0	0	115	68	89	4.9	0.54	4.28	0	1.47	1.82	23	22	37	21	0	1
62069	1	25	0	0	169.5	67.1	23.36	2	0	0	0	0	121	65	60	4.1	1.32	4.75	0	1.69	2.62	16	20	61	15	0	1
62167	1	49	0	0	172.5	73.6	24.73	2	0	1	0	1	122	77	87	5.7	2.12	6.83	1	1.31	4.29	24	31	68	22	0	1
62220	0	56	0	0	158	58.2	23.31	2	0	0	0	0	120	80	76	5.1	0.79	5.61	0	1.8	3.05	30	32	107	86	0	1
62301	0	62	1	1	155	65	27.06	3	1	0	1	0	130	84	76	5.1	1.04	5	0	1.2	2.94	18	17	124	11	0	1
61747	0	38	0	0	158	80.9	32.41	4	1	1	0	0	130	84	72	4.9	2.6	6	0	1.6	3.14	16	20	68	16	0	1
61754	1	38	0	0	168	56	19.84	2	0	1	0	0	117	81	91	5.2	1.81	4.72	0	1.31	2.31	18	15	46	26	0	1
61786	0	36	0	0	166	59	21.41	2	0	0	0	0	110	80	69	4.6	0.54	4.75	0	1.59	2.43	18	20	49	14	0	1
61797	1	39	0	0	169	74.1	25.94	3	1	0	0	0	121	86	76	5	0.37	5.57	0	2.16	2.63	21	19	44	15	0	1
61829	0	35	0	0	155	57	23.73	2	0	0	0	0	110	80	86	5.1	1.26	5.35	0	1.65	3.07	18	14	47	14	0	1
57318	1	47	0	0	175	79.2	25.86	3	0	0	0	0	114	78	77	5.1	1	3.74	0	1.41	2.01	22	24	92	15	0	1
57411	1	40	0	0	169	60.3	21.11	2	0	0	0	0	118	67	64	4.9	0.58	4.65	0	1.71	2.69	24	23	50	15	0	1
57650	0	45	0	0	164	57.7	21.45	2	0	0	0	0	100	70	72	5	0.97	4.78	0	2.28	2.19	29	29	35	19	0	1
62224	1	30	1	2	186	109.5	31.65	4	1	0	0	0	165	123	84	5.2	1.08	4.78	0	1.13	2.82	23	49	62	25	0	1
62474	1	37	1	1	169.5	75.7	26.35	3	1	1	0	0	134	83	86	5.2	6.35	6.34	1	1.05	3.38	24	44	62	19	0	1
62542	1	49	1	1	177	96.8	30.9	4	1	1	0	1	137	87	84	5.9	2	4.68	0	1.08	2.57	27	47	55	61	0	1
62556	1	62	1	1	176	96.5	31.15	4	1	1	1	1	132	88	67	5.7	1.9	4.09	0	0.88	2.29	24	34	60	17	0	1
62567	1	33	1	1	177	83	26.49	3	0	0	0	1	123	76	83	5.9	1.46	6.45	1	1.44	4.27	25	40	74	40	0	1
62581	1	50	0	0	171	72.9	24.93	2	0	1	0	0	114	76	61	5.3	2.04	5.76	0	1.24	3.31	28	38	45	44	0	1
62643	1	40	0	0	170.5	59.2	20.36	2	1	0	0	0	130	79	88	3.6	0.48	5.65	0	2.16	2.69	18	16	53	34	0	1
62661	0	19	0	0	152.5	45.8	19.69	2	0	0	1	0	110	70	86	4.9	0.46	3.24	0	1.28	1.3	17	10	74	11	0	1
62680	1	54	1	1	170.5	74.4	25.59	3	1	0	0	0	138	79	82	5.2	0.63	4	0	1.36	2.02	18	30	90	47	0	1
62797	0	45	1	1	164	68.2	25.36	3	0	0	1	0	100	70	78	4.9	1.19	4.87	0	1.23	3.17	16	20	54	20	0	1
57385	1	57	0	0	171.5	81.6	27.74	3	1	0	0	1	136	79	95	5.8	1.64	4.2	0	1.52	2.28	25	46	65	25	0	1
57585	1	25	1	1	170.5	75.9	26.11	3	1	0	0	0	140	96	89	5.5	0.92	4.89	0	1.48	2.75	23	41	99	41	0	1
63518	0	31	0	0	161	54	20.83	2	0	0	0	1	116	76	65	5.9	1.47	4.71	0	1.34	2.52	19	17	47	17	0	1
63645	0	45	0	0	150	47.4	21.07	2	0	0	0	0	110	80	76	4.8	1.35	4.49	0	1.92	2.22	17	13	55	12	0	1
63652	0	37	0	0	162	76.2	29.04	3	0	0	0	0	126	84	75	4.8	1.53	4.4	0	1.34	2.44	11	8	53	11	0	1
57654	0	49	1	1	155.5	69.5	28.74	3	1	0	0	0	160	100	79	5.2	1.21	5.01	0	2.04	2.65	21	22	53	9	0	1
62278	0	38	0	0	161	59	22.76	2	0	0	0	0	110	76	84	4.5	0.91	3.75	0	1.37	1.74	27	46	62	39	0	1
62645	1	38	1	1	177.5	77.6	24.63	2	1	1	0	0	135	83	78	4.7	3.01	5.35	0	1.58	2.94	18	25	71	45	0	1
62746	1	37	1	1	175	82.8	27.04	3	0	0	0	0	119	74	80	5.3	1.18	5.92	0	1.39	3.79	22	43	103	37	0	1
62877	0	31	0	0	165.5	54.6	19.93	2	0	0	0	0	108	76	78	5.1	0.96	4.36	0	1.61	2.28	18	18	64	10	0	1
57752	1	49	1	1	174	95.1	31.41	4	0	1	0	1	123	76	79	5.6	2.09	4.7	0	1.42	1.88	24	50	55	50	0	1
57784	1	53	1	1	171.5	77.9	26.49	3	1	0	1	1	137	80	91	11	1.12	5.02	0	0.91	3.38	31	38	69	41	0	1
57854	0	65	1	1	153.5	69	29.28	3	1	0	1	1	136	86	80	7.8	1.6	5.8	0	1.2	3.85	26	32	113	31	1	2
57879	1	54	0	0	172	68.4	23.12	2	0	0	0	1	100	60	79	6.6	0.86	4.74	0	1.33	2.62	25	23	60	13	0	1
62794	0	27	0	0	168	57.3	20.3	2	0	0	0	0	100	68	75	4.6	0.76	4.69	0	1.77	2.11	20	29	63	14	0	1
62894	0	27	0	0	164	59.8	22.23	2	0	0	0	0	100	70	81	5.4	0.68	3.56	0	1.4	1.69	22	21	37	13	0	1
62897	1	45	0	0	171	50	17.1	1	0	0	0	0	101	70	76	5.5	1.13	4.51	0	1.4	2.67	17	9	43	12	0	1
62215	1	58	1	1	177.5	87.8	27.87	3	1	0	0	1	132	95	90	8.2	1.59	6.17	1	1.54	3.75	21	31	75	23	0	1
62358	0	53	0	0	168	68	24.09	2	0	0	0	0	126	84	53	4.8	0.72	5.45	0	1.84	2.48	23	23	87	25	0	1
62440	1	27	0	0	177	87.1	27.8	3	0	0	0	0	115	77	78	4.2	1.31	4.02	0	1.12	1.89	22	36	68	21	0	1
62540	0	38	0	0	160	48.1	18.79	2	0	0	1	0	90	60	79	4.4	0.92	4.08	0	1.09	2.17	21	12	44	10	0	1
62665	0	51	0	0	159	69.2	27.37	3	1	1	0	0	146	94	84	4.5	2.18	4.62	0	1.42	2.16	18	11	78	21	0	1
62475	1	51	0	0	170	77.4	26.78	3	1	1	0	1	136	83	69	6.6	2.19	5.87	0	1.35	3.71	42	75	79	65	0	1
62482	1	50	0	0	165	82.2	30.19	4	1	0	0	1	141	90	83	5.8	0.65	4.49	0	1.3	2.22	28	33	59	16	0	1
62548	1	35	0	0	178	61	19.25	2	0	0	0	0	128	77	78	5	0.76	4.71	0	1.36	2.57	18	27	62	22	0	1
62609	0	42	0	0	160	69	26.95	3	0	0	0	0	110	80	66	5.1	1.11	4.82	0	1.32	2.58	18	14	45	17	0	1
63520	1	30	0	0	175	74.1	24.2	2	0	1	1	0	119	71	63	5.1	3.96	4.79	0	0.93	2.53	25	44	67	25	0	1
63524	0	26	0	0	165.5	50.8	18.55	2	0	0	0	0	110	76	74	4.6	0.72	4.01	0	1.62	1.66	16	14	65	10	0	1
63539	1	30	0	0	171.5	75.4	25.64	3	1	0	0	1	130	82	73	6.3	0.74	5.35	0	1.08	3.44	33	77	69	37	0	1
63571	1	41	0	0	171	68	23.26	2	0	1	0	0	124	71	65	5.1	2.2	4.01	0	1.29	1.64	31	56	79	14	0	1
57699	0	49	0	0	145	55.7	26.49	3	1	1	1	1	136	84	91	6.7	2.19	4.65	0	1.23	2.49	14	10	97	18	0	1
57731	0	58	0	0	144.5	46.1	22.08	2	0	0	0	1	120	80	80	6.3	0.96	5.51	0	1.68	3.02	22	11	74	14	0	1
57749	1	30	1	1	165.5	78.2	28.55	3	0	1	1	0	112	76	77	5.4	2.24	5.05	0	1.02	2.39	20	30	69	22	0	1
57849	1	33	1	1	171	91.7	31.36	4	1	1	0	0	136	92	71	5.5	2.13	7.12	1	1.63	3.75	27	29	50	82	0	1
57850	1	43	0	0	180	73.4	22.65	2	1	1	0	0	127	89	83	5.5	3.62	5.02	0	1.25	2.89	25	22	77	25	0	1
57899	0	46	0	0	160	54.2	21.17	2	0	0	0	1	106	70	72	6.5	0.97	5.1	0	1.62	2.56	21	15	38	8	0	1
62471	1	34	1	1	180	80.4	24.81	2	0	0	1	0	125	84	63	5.4	1.69	4.37	0	0.92	2.56	20	24	64	18	0	1
62535	1	41	0	0	175	72.9	23.8	2	0	1	0	1	108	65	68	5.9	2.23	4.39	0	1.48	1.96	16	10	67	42	0	1
62654	0	36	0	0	162	52	19.81	2	0	0	0	0	100	70	80	4.7	1.19	4.71	0	1.78	2.24	27	23	50	10	0	1
62669	1	58	1	1	154	63	26.56	3	0	0	0	1	117	66	85	8.6	1.38	5.39	0	1.29	2.97	19	25	133	34	0	1
61865	1	36	1	1	174	82.8	27.35	3	1	1	1	0	138	87	73	4	2.37	5.44	0	1.03	3.06	19	23	82	23	0	1
61915	1	39	1	1	172.5	81.2	27.29	3	0	1	0	0	123	83	87	4.9	2.55	5.11	0	1.31	3.04	23	39	53	37	0	1
61972	1	32	0	0	176	58.3	18.82	2	0	0	0	0	109	74	93	4.6	1.2	4.6	0	1.6	2.46	20	22	82	39	0	1
61979	0	36	0	0	162	60	22.86	2	0	1	1	0	116	80	78	5.3	1.85	4.13	0	1.2	2.16	14	14	53	12	0	1
62855	0	38	1	1	161	64.3	24.81	2	0	1	1	1	116	70	74	6.2	2	4.67	0	0.99	2.68	14	16	72	18	0	1
63187	1	56	0	0	166.5	67.1	24.2	2	0	0	0	1	120	67	56	6.4	0.72	5.3	0	1.65	2.84	19	28	90	14	0	1
63206	1	39	1	1	171	85.4	29.21	3	0	1	0	0	129	76	79	5	2.38	4.99	0	1.5	2.86	26	57	59	44	0	1
63238	0	30	0	0	170	73.6	25.47	3	0	0	1	0	100	70	71	5.3	0.71	3.94	0	1.23	1.9	14	15	46	14	0	1
63270	0	46	1	1	161	65	25.08	3	0	0	0	0	120	80	64	5.3	1.23	5.18	0	1.52	2.61	21	22	52	15	0	1
62861	1	45	1	1	172	84.9	28.7	3	0	0	0	1	121	77	74	6.4	1.61	5.37	0	1.16	3.53	20	36	64	52	0	1
63261	0	21	0	0	165	57	20.94	2	0	0	0	0	100	70	74	4.5	1.02	4.12	0	1.32	1.95	19	15	87	10	0	1
62649	1	52	0	0	175.5	73.4	23.83	2	0	1	0	1	115	73	84	5.9	1.94	6.03	1	1.47	3.6	28	44	66	34	0	1
62674	0	43	0	0	163	51.8	19.5	2	0	0	0	0	110	80	98	4.8	0.45	5.71	0	2.3	2.52	20	16	44	12	0	1
62699	0	38	0	0	158.5	57.6	22.93	2	0	0	0	0	110	80	91	5.2	0.54	3.66	0	1.66	1.47	16	15	38	12	0	1
62831	1	42	1	2	170.5	79.6	27.38	3	1	1	0	1	135	95	78	6.7	2.43	4.43	0	1.12	2.5	20	36	62	38	0	1
64009	1	48	0	0	175	88	28.73	3	1	1	0	0	151	98	59	4.7	1.94	4.52	0	1.1	2.57	20	24	65	18	0	1
64084	0	62	0	0	150.5	66.9	29.54	3	0	0	0	0	120	80	65	5.3	0.86	4.34	0	1.57	1.95	18	30	74	13	0	1
64118	1	46	0	0	170.5	67.2	23.12	2	1	1	0	1	119	87	74	10	1.98	5.76	0	1.45	2.87	17	46	61	38	0	1
57721	0	43	0	0	166	49.3	17.89	1	0	0	0	1	100	70	68	6.3	0.84	4.75	0	1.77	2.22	23	16	55	9	0	1
57755	0	53	0	0	161	63.2	24.38	2	0	0	0	0	126	84	82	4.8	1.61	6.19	1	1.84	3.66	34	44	68	21	0	1
57823	0	39	0	0	161	57	21.99	2	0	0	0	0	110	72	75	5.4	1.35	5.38	0	1.9	2.58	23	40	79	162	0	1
57938	0	49	0	0	159	56.4	22.31	2	0	0	0	0	110	70	76	4.8	0.78	5.48	0	1.48	3.4	27	30	54	45	0	1
63011	1	50	1	2	171.5	84.5	28.73	3	0	0	0	0	129	77	75	5.2	1.29	4.53	0	1.37	2.3	64	161	56	93	0	1
63229	1	25	1	1	176.5	88.2	28.31	3	1	1	0	0	146	84	92	4.9	1.95	5.78	0	1.33	3.72	18	35	48	28	0	1
63230	1	54	1	2	176.5	90.5	29.05	3	1	1	0	0	120	89	79	5.2	2.12	6.25	1	1.5	4.11	25	42	84	84	0	1
63247	0	24	0	0	160	59.2	23.12	2	0	0	0	0	100	70	76	5	0.62	3.6	0	1.6	1.56	13	5	53	11	0	1
63248	0	25	0	0	169	48.3	16.91	1	0	0	0	0	100	70	84	4.6	0.52	2.78	0	1.5	1.01	19	13	46	11	0	1
57750	1	27	1	1	163	73.2	27.55	3	0	1	0	0	120	78	90	4.8	7.55	6.34	1	1.3	2.76	37	52	143	75	0	1
57818	1	41	0	0	171.5	85.2	28.97	3	1	1	0	1	144	100	92	7.3	3.02	6.32	1	1.85	3.83	30	33	50	72	0	1
57943	1	31	1	1	176.5	73.7	23.66	2	1	0	0	1	143	92	82	6.3	1.39	5.73	0	1.33	3.58	19	34	113	20	0	1
63013	1	28	1	1	177	94.9	30.29	4	1	1	0	0	121	91	77	4.8	3.07	4.62	0	1.08	2.69	29	66	73	95	0	1
57894	0	34	0	0	158.5	57.2	22.77	2	0	0	0	0	110	70	83	4.7	0.96	5	0	1.45	2.91	21	20	47	17	0	1
58137	1	35	0	0	171.5	71.6	24.34	2	0	0	0	0	128	78	79	5.5	1.33	5.86	0	1.59	3.55	22	24	70	26	0	1
58194	0	47	0	0	162	59.8	22.79	2	1	0	0	1	130	86	72	5.9	1.38	5.81	0	1.67	3.09	24	23	79	16	0	1
62682	0	54	0	0	159	70.5	27.89	3	0	0	0	0	118	74	78	4.9	0.77	5.08	0	1.9	2.35	19	16	66	13	0	1
62839	0	33	0	0	149	57.2	25.76	3	0	1	1	0	110	80	76	5.1	2.64	3.78	0	1.19	1.59	15	7	71	14	0	1
62843	1	42	1	1	170	82.3	28.48	3	0	0	0	0	110	62	61	4.5	1.23	5.55	0	1.38	3.31	21	36	68	37	0	1
57537	0	33	0	0	159	57.7	22.82	2	0	0	0	0	100	70	67	5.2	0.93	4.22	0	2.04	1.84	14	11	54	14	0	1
57541	0	43	0	0	160	57.6	22.5	2	0	0	0	0	120	80	78	5	0.7	4.78	0	2.12	2.29	19	11	47	11	0	1
57556	1	27	0	0	158	63.2	25.32	3	1	0	0	0	163	108	97	5	1.28	4.29	0	1.25	2.45	18	26	55	32	0	1
57624	0	49	1	1	142.5	58.5	28.81	3	0	0	0	1	120	84	71	5.7	1.68	5.18	0	1.7	2.87	23	22	35	30	0	1
62783	1	45	1	2	183.5	109.7	32.58	4	1	1	1	1	172	122	91	5.9	2.95	4.67	0	1.04	2.42	26	54	114	34	0	1
62815	0	27	0	0	163.5	49.8	18.63	2	0	0	0	0	90	60	72	5	0.68	3.75	0	1.66	1.48	19	13	40	12	0	1
62865	0	48	0	0	170.5	69.9	24.05	2	0	1	0	0	110	80	74	5.1	1.91	5.01	0	1.43	2.73	16	13	44	14	0	1
62915	0	65	0	0	165	80	29.38	3	0	0	0	0	126	84	65	5.1	1.49	4.65	0	1.64	2.36	21	15	67	18	0	1
57497	1	41	0	0	173.5	68.2	22.66	2	0	0	0	1	121	76	79	5.6	1.65	5.62	0	1.71	3.59	23	25	58	37	0	1
57629	1	50	0	0	179.5	65.6	20.36	2	0	0	0	0	120	62	92	4.9	0.83	4.75	0	2.27	2.16	20	10	58	21	0	1
62022	1	34	0	0	177.5	79.6	25.26	3	0	0	0	0	115	76	66	4.3	1.31	4.96	0	1.5	2.71	21	28	37	17	0	1
62065	1	26	0	0	178	65.8	20.77	2	0	1	0	0	125	82	81	5	2.01	4.38	0	1.34	2.09	21	17	65	18	0	1
62090	1	25	0	0	182	63	19.02	2	0	1	0	0	126	83	96	4.4	1.7	4.69	0	1.37	2.22	43	71	69	24	0	1
62265	1	37	0	0	179	68	21.22	2	0	0	0	0	114	73	79	4.8	0.96	4.63	0	1.61	2.18	18	19	59	18	0	1
63654	1	36	0	0	175	69	22.53	2	0	0	1	0	108	65	63	5.1	0.98	3.61	0	1.01	2.03	17	20	50	14	0	1
63739	0	48	0	0	171	61	20.86	2	0	0	0	0	100	70	82	4.7	0.66	4.58	0	1.48	2.31	13	18	53	10	0	1
63805	1	61	0	0	168	61	21.61	2	0	0	0	0	121	74	76	4.7	0.99	5.13	0	1.62	2.87	21	23	74	25	0	1
64024	0	41	0	0	156.5	57.3	23.4	2	0	0	0	0	110	76	93	5	0.56	3.7	0	1.6	1.41	15	10	47	12	1	2
63504	1	45	1	2	170	77.4	26.78	3	0	0	0	1	119	67	88	6.8	1.58	4	0	1.06	2.11	16	24	98	41	0	1
62703	0	35	0	0	162	58.5	22.29	2	0	0	0	1	110	80	95	5.6	1.27	5.3	0	1.77	2.85	17	17	38	13	0	1
62852	1	51	1	1	171	81.4	27.84	3	0	0	0	1	118	79	76	6	1.06	5.84	0	2.04	3.29	17	12	71	27	0	1
62886	0	28	0	0	168.5	59.6	20.99	2	0	0	0	0	100	70	82	4.8	0.55	3.76	0	1.58	1.72	20	13	86	12	0	1
62935	0	58	1	1	167.5	66.2	23.6	2	0	0	0	0	106	70	65	4.8	1.34	5.36	0	1.49	3.32	26	39	91	30	0	1
63265	1	33	1	1	176.5	87.4	28.06	3	1	1	0	0	137	77	79	5.5	1.72	5.27	0	1.29	3.14	23	25	58	15	0	1
63547	0	29	0	0	163	55	20.7	2	0	0	0	0	110	70	76	4.9	0.85	4.14	0	1.43	1.89	18	16	55	11	0	1
63647	0	27	0	0	162.5	57.4	21.74	2	0	0	0	0	100	70	62	5	1.49	3.84	0	1.58	1.63	13	6	86	11	0	1
64243	0	28	0	0	149.5	64.2	28.72	3	0	0	1	1	120	80	93	6.7	0.75	3.02	0	1.22	1.41	19	19	77	21	0	1
64245	0	23	0	0	170	55	19.03	2	0	0	1	1	100	70	83	5.6	1.12	3.23	0	1.23	1.57	16	12	59	14	0	1
64252	0	32	0	0	158.5	46.6	18.55	2	0	0	0	0	94	66	70	4.8	0.54	3.87	0	1.83	1.62	16	13	41	10	0	1
64313	0	42	0	0	156	61.7	25.35	3	1	0	0	0	120	88	72	4.8	1.53	4.82	0	1.67	2.27	16	17	55	13	0	1
64322	1	34	0	0	171	72	24.62	2	0	0	0	0	127	67	62	5.1	1.55	4.64	0	1.42	2.77	30	37	84	47	0	1
64420	1	32	1	2	176	82	26.47	3	1	1	0	0	134	78	89	4.6	2.01	4.35	0	1.45	2.16	37	68	70	71	0	1
57997	1	56	0	0	166	59.2	21.48	2	0	0	0	1	123	80	95	6.6	0.9	4.33	0	1.11	2.51	28	30	104	38	0	1
58033	1	31	0	0	175.5	77.6	25.19	3	0	1	0	0	124	72	99	5.5	1.83	4.67	0	1.32	2.34	18	26	62	17	0	1
58047	0	61	1	1	166	73.8	26.78	3	1	1	0	1	140	90	57	7.1	2.24	5.2	0	1.33	3.02	32	35	103	53	0	1
58116	1	22	0	0	172	59.2	20.01	2	0	0	0	0	118	62	67	4.7	1.51	4.88	0	1.74	2.25	25	16	87	18	0	1
58147	0	39	0	0	159.5	52.1	20.48	2	0	0	0	0	96	66	75	5	1.49	5.27	0	2.03	2.72	19	10	38	11	0	1
58148	0	28	0	0	156	54.6	22.44	2	1	0	0	0	144	94	96	4.6	0.53	3.76	0	1.56	1.87	22	16	54	11	0	1
58077	1	52	1	1	168.5	70.2	24.73	2	1	0	0	1	137	89	80	6.7	1.38	7.03	1	1.56	4.05	23	19	67	16	0	1
58079	1	60	0	0	164	71	26.4	3	1	0	0	0	138	74	72	4.8	1.25	4.48	0	1.22	2.56	28	29	65	14	0	1
58088	0	45	0	0	164	57.8	21.49	2	0	0	0	0	100	70	79	5.1	1.36	5.52	0	1.38	3.4	23	17	63	15	0	1
58154	0	45	0	0	160	52.6	20.55	2	0	1	1	0	110	76	80	5.5	1.84	5.12	0	1.13	3.4	19	17	36	19	0	1
58179	0	48	0	0	165	60	22.04	2	0	0	0	1	96	66	59	6.3	0.76	5.45	0	1.66	3	18	25	66	17	0	1
58186	1	50	0	0	168.5	76.6	26.98	3	1	1	0	1	140	94	82	6.7	2.72	6.85	1	1.64	4.01	17	14	85	45	0	1
62948	0	64	1	1	157	60.6	24.59	2	1	1	1	1	160	100	76	6.1	15.88	6	0	1.13	1.97	21	17	91	22	0	1
63016	0	32	0	0	165	56.8	20.86	2	0	0	0	0	100	70	69	4.8	0.64	4.55	0	1.77	2.1	18	7	46	12	0	1
63075	1	37	0	0	185	78	22.79	2	0	0	0	0	120	68	78	5.1	0.54	3.45	0	1.38	1.37	21	14	64	12	0	1
63479	1	23	1	1	169.5	89.7	31.22	4	0	1	1	0	111	62	78	4.5	2.25	4.59	0	1	2.63	25	37	57	25	0	1
63497	1	29	0	0	178	75.7	23.89	2	0	0	0	0	120	62	88	4.9	1.23	4.71	0	1.2	2.75	28	55	59	25	0	1
63529	1	47	0	0	173.5	85.8	28.5	3	0	0	0	0	119	83	80	5.1	1.38	4.38	0	1.25	2.34	19	27	46	32	0	1
63662	0	28	0	0	161	55.4	21.37	2	0	0	0	0	100	70	64	5.1	0.63	4.36	0	1.71	2.32	15	7	47	13	0	1
62960	0	60	1	1	164.5	68.4	25.28	3	0	1	0	1	124	82	96	6.3	4.07	5.73	0	1.46	3.16	19	19	72	25	0	1
62992	0	43	0	0	162	60.6	23.09	2	0	1	0	0	110	80	78	4.6	2.76	5.24	0	1.78	2.54	19	18	59	18	0	1
63017	0	57	0	0	150.5	57.7	25.47	3	0	0	0	0	120	80	76	5.3	1.27	4.8	0	1.4	2.59	21	27	49	14	1	2
63060	1	49	1	1	174.5	73.6	24.17	2	0	0	0	1	128	83	84	5.6	0.67	5.31	0	1.7	2.89	28	30	55	14	0	1
57926	0	53	0	0	148	48	21.91	2	0	0	0	0	120	80	72	5.3	1.07	5.16	0	1.71	2.44	23	15	71	10	0	1
57962	1	60	1	1	167	77	27.61	3	1	1	0	0	136	78	78	5.5	2.02	4.52	0	1.15	2.45	31	60	94	43	0	1
57987	1	47	0	0	170.5	74.2	25.52	3	0	0	1	0	110	82	68	5.5	0.89	4.34	0	0.88	2.79	31	55	77	51	0	1
58001	1	56	0	0	166	57	20.69	2	1	0	0	0	130	73	77	5.4	1.13	4.71	0	1.19	2.68	14	9	89	19	0	1
58019	0	20	0	0	164	48.1	17.88	1	0	0	0	0	106	74	61	5.1	0.62	4.47	0	1.92	1.63	14	7	44	12	0	1
57861	1	41	0	0	168	66.7	23.63	2	1	1	0	1	130	87	105	7.3	3.1	6.09	1	1.47	3.65	43	40	82	108	0	1
57936	1	46	1	1	174	79.4	26.23	3	1	1	0	0	129	87	90	5.5	2.47	6.27	1	1.62	3.56	17	17	87	55	0	1
58004	0	32	0	0	165	61.6	22.63	2	0	0	0	0	106	72	76	4.4	0.67	3.94	0	1.44	1.78	18	20	57	9	0	1
58061	1	40	1	1	171.5	77.4	26.32	3	1	0	0	0	132	88	90	5.4	1.52	5.59	0	1.32	3.44	40	87	113	63	0	1
63481	1	25	0	0	167	62	22.23	2	0	0	0	0	97	70	76	4.2	1.33	3.83	0	1.24	2.09	15	24	87	17	0	1
63482	1	23	0	0	177.5	62.6	19.87	2	0	0	0	0	102	64	82	4.7	0.82	3.82	0	1.08	1.97	19	10	57	13	0	1
63495	1	37	1	1	156	65.9	27.08	3	0	1	1	0	129	81	93	5.3	2.72	5.12	0	1.03	3.05	23	40	53	30	0	1
63563	1	31	1	1	171.5	77.2	26.25	3	1	0	1	0	134	83	80	4.9	1.53	3.56	0	0.91	1.83	24	26	71	44	0	1
63582	1	31	0	0	178.5	62.6	19.65	2	0	0	0	0	116	78	69	4.9	0.96	4.51	0	1.66	2.1	23	13	57	16	0	1
62458	1	54	1	2	154	56.8	23.95	2	0	1	0	0	116	79	79	4.9	1.79	4.65	0	1.35	2.36	29	35	80	131	0	1
62490	0	50	0	0	160	62.6	24.45	2	0	0	0	0	120	80	76	5	1.58	5.09	0	1.3	2.71	17	16	63	11	0	1
62647	1	42	1	1	176	84.4	27.25	3	1	1	0	1	137	88	84	6.9	2.53	5.49	0	1.15	3.35	21	40	64	44	0	1
62976	1	41	1	1	164	80	29.74	3	1	1	0	0	131	84	98	5.3	2.67	4.8	0	1.24	2.69	17	25	49	26	0	1
63090	1	48	0	0	179	92	28.71	3	1	0	0	0	135	90	69	4.9	1.34	6.45	1	1.57	3.79	29	61	88	41	0	1
63233	0	42	0	0	162	58.2	22.18	2	0	0	0	0	92	64	70	4.5	0.62	5.21	0	2.29	2.35	22	14	52	12	0	1
63240	0	26	0	0	168.5	57	20.08	2	0	0	0	0	120	80	82	5.1	0.56	3.39	0	1.4	1.67	14	10	40	11	0	1
63258	0	25	0	0	163	51	19.2	2	0	0	0	0	110	76	74	4.9	0.6	5.42	0	1.94	2.71	16	12	65	12	0	1
64141	1	42	1	2	174.5	89.4	29.36	3	1	0	0	1	127	90	88	6	1.41	5.26	0	1.5	3.01	32	56	72	76	0	1
64339	0	43	0	0	160	64	25	3	0	0	1	1	116	74	67	5.9	1.06	4.24	0	1.19	2.17	24	40	69	29	0	1
64390	1	41	1	2	168	82	29.05	3	0	1	0	0	112	73	80	4.4	2.25	6.12	1	1.38	3.78	25	40	73	24	0	1
64407	1	29	0	0	170	79.7	27.58	3	0	1	0	0	116	76	NULL	4.4	2.06	4.49	0	1.2	2.48	22	28	75	24	0	1
63623	1	40	1	1	176	80	25.83	3	0	1	0	0	125	79	67	4.7	1.94	5.37	0	1.33	3.33	18	14	80	46	0	1
63640	0	23	0	0	159.5	57.6	22.64	2	0	0	0	0	106	74	78	4.4	1.26	4.13	0	1.86	1.77	18	15	36	18	0	1
63738	0	58	0	0	156	72.8	29.91	3	1	1	1	1	146	100	74	5.6	2.42	5.06	0	1.15	3.06	22	22	75	11	0	1
63823	1	45	0	0	177	71	22.66	2	0	0	0	0	124	84	79	4.9	1.53	5.07	0	1.14	3.09	20	30	45	21	0	1
57748	1	30	0	0	168.5	64.7	22.79	2	0	0	0	0	117	69	85	4.8	1.43	4.56	0	1.37	1.92	26	35	76	19	0	1
57933	1	30	0	0	167.5	76.2	27.16	3	1	0	1	1	135	79	71	5.6	1.33	7.64	1	1.02	5.6	15	14	42	11	0	1
57948	1	52	1	1	166	75.6	27.44	3	1	1	1	1	136	85	76	5.7	2.37	4.43	0	0.93	2.56	17	21	58	20	0	1
58048	1	36	0	0	178	73.6	23.23	2	0	0	0	1	116	72	70	5.7	1	5.15	0	1.43	2.92	27	33	64	37	0	1
63897	1	40	0	0	173.5	63.2	21	2	0	1	0	0	104	73	86	4.9	2.45	5.8	0	1.44	3.54	20	16	38	40	0	1
63997	0	42	0	0	166	60	21.77	2	0	0	0	0	104	74	78	5.1	0.77	5.01	0	1.86	2.25	17	15	52	10	0	1
64033	1	44	0	0	167.5	69.2	24.66	2	0	0	0	0	113	67	107	5	1.58	4.84	0	1.53	2.47	24	51	78	101	0	1
64048	1	38	0	0	171	62.9	21.51	2	0	0	0	0	116	74	75	5	1.35	5.55	0	1.5	3.31	17	13	97	20	0	1
63915	1	41	1	1	171.5	69.7	23.7	2	0	0	0	0	123	78	75	5.1	1.34	5.45	0	1.65	3.1	25	24	49	37	1	2
63998	1	46	1	2	171	105	35.91	4	1	1	0	1	139	88	83	6.5	1.82	5.52	0	1.26	3.38	21	40	65	45	0	1
64552	0	57	0	0	149.5	58	25.95	3	1	1	0	1	140	86	71	6.6	2.24	6.21	1	1.57	3.69	22	24	76	21	0	1
64556	0	28	0	0	168	74.1	26.25	3	0	0	0	0	100	70	74	5.5	1.48	4.9	0	1.53	2.68	19	15	67	20	0	1
64711	0	35	0	0	151.5	66	28.76	3	0	0	0	0	100	70	70	4.6	0.82	3.83	0	1.33	2.09	25	23	71	15	0	1
64845	0	26	0	0	158.5	51.6	20.54	2	0	0	0	0	100	70	76	5.4	0.78	4.42	0	1.54	2.45	14	7	53	13	0	1
59047	0	48	1	1	164	70.6	26.25	3	0	0	0	0	116	80	76	5.2	1.16	5.51	0	1.49	3.28	18	16	49	23	0	1
59056	0	24	0	0	155.5	41.9	17.33	1	0	0	0	0	110	76	86	5.4	1.21	4.99	0	2.06	2.49	16	8	48	12	0	1
59081	0	59	0	0	168	53.4	18.92	2	1	1	0	0	140	90	72	5.3	2.22	5.39	0	1.92	2.58	21	20	88	13	0	1
60887	0	41	0	0	165	60	22.04	2	0	0	0	0	90	60	75	5.1	0.77	4.94	0	1.7	2.74	15	20	63	11	0	1
60896	1	45	0	0	177	77	24.58	2	0	0	0	0	105	65	64	4.8	0.51	4.09	0	1.58	1.97	17	19	76	10	0	1
63218	0	56	1	2	152	64	27.7	3	1	1	0	0	144	94	82	5.2	1.93	4.83	0	1.59	2.45	23	30	72	24	0	1
63243	0	24	0	0	163	54.4	20.47	2	0	0	1	0	106	70	70	4.6	0.98	3.5	0	1.28	1.71	17	11	42	7	0	1
63511	1	34	0	0	185.5	77.8	22.61	2	0	0	0	0	121	72	80	5	1.6	5.16	0	1.16	3.18	16	15	50	13	0	1
63124	1	63	0	0	157	55.2	22.39	2	1	0	0	0	158	95	80	5	1.11	5.29	0	1.42	3.02	22	27	76	11	0	1
63474	0	23	0	0	163	60.2	22.66	2	0	0	0	0	100	70	74	4.5	0.33	4.91	0	1.78	2.3	17	12	42	13	0	1
63485	1	45	1	2	179.5	89.4	27.75	3	0	1	0	1	125	75	75	9	1.97	5.21	0	1.14	3.18	42	83	67	102	0	1
63503	1	26	0	0	170	63.3	21.9	2	0	0	0	0	122	67	70	4.7	1.12	4.26	0	1.39	2.13	26	39	86	19	0	1
58122	1	33	0	0	169.5	67.9	23.63	2	0	0	0	1	127	75	91	5.7	1.14	4.15	0	1.56	1.61	18	30	93	29	0	1
58156	0	54	0	0	152.5	56.4	24.25	2	0	0	0	0	116	80	85	4.4	1.38	5.59	0	1.72	3.11	27	24	95	23	0	1
58192	1	47	0	0	168.5	64.3	22.65	2	0	0	0	1	118	60	71	6.1	1.06	5.12	0	1.83	2.09	26	25	59	28	0	1
58292	0	34	0	0	156	48.8	20.05	2	0	0	0	0	100	70	80	4.9	0.73	4.61	0	1.38	2.6	30	27	66	39	0	1
57610	1	46	0	0	168	76	26.93	3	1	1	0	1	138	88	88	6.4	7.19	4.73	0	1.24	1.58	25	29	48	32	0	1
57660	1	57	0	0	173	77.9	26.03	3	1	0	0	0	158	92	58	5.5	0.87	5.26	0	1.7	3	19	22	89	31	0	1
57753	1	50	1	1	168	73.2	25.94	3	1	1	0	0	139	90	57	5.4	5.81	4.82	0	1.19	2.19	20	26	48	26	0	1
57785	1	54	1	1	168	87.1	30.86	4	1	0	1	1	148	83	95	16.6	1.61	4.82	0	0.97	3.42	22	42	50	57	0	1
62658	0	48	0	0	155	57	23.73	2	0	1	0	0	110	74	71	4.6	2.02	4.99	0	1.5	2.71	17	23	47	12	0	1
62801	0	46	0	0	161	55.4	21.37	2	0	0	0	1	100	70	87	5.9	0.59	4.64	0	1.96	2.04	18	14	52	13	0	1
63383	0	41	0	0	162	55.4	21.11	2	0	0	0	0	106	70	76	5	0.56	4.62	0	1.73	2	21	18	47	15	0	1
63458	1	43	0	0	171	72	24.62	2	0	0	0	0	119	74	92	5.4	0.78	3.81	0	1.48	1.49	18	23	74	20	0	1
63469	1	26	0	0	176.5	87	27.93	3	0	0	1	0	119	68	85	4.8	0.54	3.22	0	1.01	1.55	22	21	46	13	0	1
63651	0	39	0	0	156	58.6	24.08	2	0	0	0	0	110	70	74	5.4	0.94	3.64	0	1.54	1.67	15	7	61	10	0	1
62986	1	45	0	0	174.5	84	27.59	3	1	1	0	0	134	85	73	4.6	2.22	5.29	0	1.58	2.91	27	21	81	57	0	1
62988	1	48	0	0	172	84.6	28.6	3	1	1	0	1	153	97	83	5.7	1.74	5.3	0	1.64	2.73	33	53	52	210	0	1
63005	1	26	0	0	167	58	20.8	2	0	0	0	0	108	61	80	4.6	0.71	3.66	0	1.31	1.72	15	9	44	11	0	1
63086	1	54	0	0	160	63.6	24.84	2	1	0	0	0	144	84	75	4.5	1.36	4.34	0	1.05	2.45	23	30	88	19	0	1
63105	1	41	1	1	174.5	82.8	27.19	3	1	1	0	1	145	99	85	6.2	2.07	6.32	1	1.2	4.15	14	18	62	90	0	1
63205	1	42	1	1	166.5	68.2	24.6	2	0	0	0	1	117	79	71	6.6	1.06	4.83	0	1.12	2.86	23	49	66	42	0	1
63222	1	22	0	0	173.5	69	22.92	2	0	0	0	0	104	59	58	4.7	0.71	4.5	0	1.35	2.6	21	18	47	13	0	1
57724	0	37	0	0	166	51.8	18.8	2	0	0	0	1	100	68	72	5.7	1.14	5.03	0	1.84	2.36	17	9	35	12	0	1
57756	0	52	1	2	151.5	72.8	31.72	4	0	1	1	0	120	80	70	5.5	2.87	5.63	0	1.15	3.31	39	77	68	55	0	1
57939	0	29	0	0	167	47.2	16.92	1	0	0	0	0	110	80	76	5.3	0.4	4.48	0	1.57	2.13	19	12	71	10	0	1
58007	0	43	0	0	156	61	25.07	3	1	1	0	1	142	90	74	5.7	2.11	5.92	0	1.47	3.77	16	18	36	12	0	1
63732	1	55	0	0	173	78.4	26.2	3	1	0	0	0	133	83	58	4.7	0.58	2.81	0	1.16	1.16	23	40	63	10	0	1
64000	0	41	1	2	170	85.7	29.65	3	0	1	1	0	116	80	84	5.2	1.76	4.65	0	1.14	2.79	20	28	56	14	0	1
64049	0	45	0	0	158	58	23.23	2	0	0	0	0	96	66	68	5.2	0.68	4.64	0	1.33	2.69	19	14	52	24	0	1
64132	0	47	0	0	156	52.9	21.74	2	0	1	0	0	120	84	87	4.7	2.09	5.05	0	2.05	1.95	14	9	53	25	0	1
64409	1	55	0	0	170	67.7	23.43	2	0	1	0	1	120	70	55	5.8	2.11	5.14	0	1.58	2.87	24	20	48	13	0	1
64424	1	30	0	0	188	69.6	19.69	2	0	0	0	0	107	80	87	4.3	1.41	4.06	0	1.2	2.15	17	14	55	13	0	1
64543	0	42	0	0	163	56.4	21.23	2	0	0	0	0	110	72	85	4.7	0.82	4.64	0	1.85	1.99	25	22	40	16	0	1
64658	1	47	1	1	167	72.9	26.14	3	0	1	0	0	124	79	66	5.4	3.77	5.02	0	1.11	3.03	21	30	86	55	0	1
64660	0	36	0	0	166	52.2	18.94	2	0	0	0	0	100	70	85	4.2	1	3.86	0	2.12	1.26	47	51	60	15	0	1
64675	0	31	0	0	155	56.2	23.39	2	0	0	0	0	100	70	90	4.6	1.53	5.77	0	2.03	2.95	16	14	48	13	0	1
63938	1	21	0	0	174	79	26.09	3	0	0	0	0	126	77	80	4.9	0.82	5.41	0	1.55	3.08	20	20	100	16	0	1
63955	0	27	0	0	151	42.1	18.46	1	0	0	0	0	100	70	74	5	0.49	4.35	0	1.95	1.69	21	13	53	13	0	1
63957	1	43	0	0	177	74.4	23.75	2	0	0	0	1	129	77	74	6	1.23	4.5	0	1.23	2.72	18	18	44	19	0	1
64074	0	43	1	1	163	69.5	26.16	3	0	1	1	1	104	70	72	6	2.37	5.39	0	1.28	3.95	25	27	65	43	0	1
64157	0	58	0	0	158	61.8	24.76	2	0	0	0	1	110	80	67	5.6	1.64	5.42	0	1.44	3.05	15	10	69	8	0	1
64159	1	44	0	0	167	66.6	23.88	2	0	0	0	0	110	83	76	5.3	1.2	4.07	0	1.44	1.9	14	8	49	17	0	1
64242	0	24	0	0	159	51	20.17	2	0	0	0	0	90	60	82	4.5	0.62	4.67	0	1.93	2.1	18	12	54	11	0	1
64116	0	39	0	0	158	60.6	24.27	2	0	0	0	0	110	76	83	5.2	1.06	4.42	0	1.3	2.4	13	16	36	18	0	1
64134	1	36	1	1	178	94	29.67	3	0	0	0	0	123	83	75	5.2	1.53	5.62	0	1.29	3.08	21	42	52	70	0	1
64148	1	48	1	1	171.5	77.7	26.42	3	1	1	0	1	137	87	67	5.6	1.91	4.93	0	1.68	2.34	24	42	60	51	0	1
64298	1	62	1	2	165.5	80.1	29.24	3	1	1	0	0	132	85	86	5.3	5.41	5.23	0	1.21	2.59	26	56	86	59	0	1
64316	1	45	0	0	162	66	25.15	3	0	1	0	0	108	69	65	4.4	1.77	4.23	0	1.11	2.3	21	21	67	26	0	1
57986	1	55	0	0	180	73.2	22.59	2	0	0	1	0	126	70	79	5.4	1.23	3.89	0	0.98	2.22	23	27	65	28	0	1
57988	0	54	0	0	165.5	53.5	19.53	2	0	0	0	1	106	74	70	5.9	0.77	5.53	0	1.55	3.19	22	26	98	39	0	1
58011	1	49	0	0	170	70.4	24.36	2	0	0	0	0	122	80	72	5.2	1.45	5	0	1.27	3	29	34	98	26	0	1
58143	1	29	0	0	174.5	61.7	20.26	2	0	0	0	0	118	74	69	4.6	1.27	4.09	0	1.24	2.21	18	9	78	15	0	1
58152	0	31	0	0	159.5	59.2	23.27	2	0	0	1	0	114	80	69	4.9	1.66	4.59	0	1.16	2.6	14	12	114	16	0	1
58188	0	29	0	0	165.5	58	21.18	2	0	0	0	1	100	70	76	5.7	1.15	5.51	0	1.49	3.13	23	17	57	12	0	1
64854	0	31	0	0	158	67.5	27.04	3	0	0	1	0	120	80	80	4.7	1.05	4.45	0	1.16	2.65	19	23	94	14	0	1
64915	0	38	1	1	159	62.9	24.88	2	0	0	1	0	126	84	70	5	0.93	3.19	0	1.05	1.6	23	22	62	32	0	1
64988	1	46	1	1	171	85	29.07	3	1	1	0	0	125	85	78	4.8	2.26	6.18	1	1.14	3.73	27	44	152	32	0	1
65013	1	60	0	0	171.5	52.3	17.78	1	0	0	0	0	115	71	57	4.3	0.65	4.44	0	1.91	2.02	28	24	68	17	0	1
64315	0	46	0	0	155	73	30.39	4	1	0	0	1	150	100	88	5.7	1.11	4.58	0	1.32	2.55	17	16	90	20	0	1
58044	1	55	1	1	160	79.4	31.02	4	1	1	0	0	146	85	94	5.3	2.2	5.9	0	1.41	3.76	25	37	50	35	0	1
58051	1	49	0	0	179	65.6	20.47	2	0	0	0	1	119	83	101	5.6	1.51	5.08	0	1.34	2.92	25	15	89	37	0	1
58076	0	45	0	0	163.5	64.2	24.02	2	1	0	0	1	126	94	69	5.6	0.74	5.35	0	1.56	3.31	19	16	40	11	0	1
58130	1	46	0	0	182.5	72.8	21.86	2	0	1	0	1	111	70	69	5.9	2.36	5.3	0	1.36	2.7	13	16	40	32	0	1
57931	0	45	0	0	154.5	62.8	26.31	3	0	0	1	0	106	74	84	5.3	1.01	4.33	0	1.27	2.13	16	31	43	17	0	1
57950	1	33	0	0	173.5	72.9	24.22	2	0	1	0	0	108	68	70	5.4	1.86	5.06	0	1.3	2.86	31	40	68	22	0	1
57967	1	32	1	1	178	88.6	27.96	3	1	1	0	0	135	83	83	5.5	3.35	5.22	0	1.07	3.18	17	24	106	27	0	1
58082	1	49	0	0	177.5	78.3	24.85	2	0	1	1	0	110	75	68	5.2	3.1	3.98	0	1.03	2.09	34	47	51	40	0	1
58181	1	37	0	0	174.5	75.4	24.76	2	1	0	1	1	143	94	82	5.8	0.85	4.37	0	1.01	2.46	31	60	91	11	0	1
58182	1	42	1	1	171	73.6	25.17	3	0	1	0	1	121	84	69	6.3	2.75	5.96	0	1.28	3.43	18	17	79	33	0	1
58127	0	25	0	0	162.5	52.7	19.96	2	0	0	0	1	106	70	76	6	1.14	7.09	1	1.59	4.51	24	29	55	16	0	1
58170	0	50	0	0	165	69	25.34	3	0	1	0	1	96	66	72	5.6	3.41	5.66	0	1.41	2.85	19	30	68	43	0	1
58195	1	26	0	0	183.5	66.2	19.66	2	0	0	0	1	120	70	74	5.9	1.21	5.01	0	1.58	2.53	40	62	57	28	0	1
58229	0	58	0	0	151	57.7	25.31	3	0	0	0	1	114	72	74	8.9	1.17	5.88	0	1.39	3.83	46	75	95	152	0	1
58236	0	48	0	0	165	54	19.83	2	0	0	0	1	110	74	106	5.7	0.95	5.12	0	1.82	2.6	22	23	46	13	0	1
62908	0	46	0	0	167	73	26.18	3	0	1	1	0	120	80	74	5.3	2.12	3.55	0	1.14	1.8	18	22	57	14	0	1
63101	0	50	0	0	158.5	68.4	27.23	3	1	0	0	0	130	80	76	5.1	0.67	3.94	0	1.49	1.67	20	15	47	9	1	2
63542	1	27	1	1	188.5	111.5	31.38	4	0	1	1	0	125	80	79	5.4	7.19	4.79	0	0.95	1.94	23	34	84	58	0	1
63592	1	33	0	0	171	62.4	21.34	2	0	0	0	1	114	74	68	5.7	0.43	3.33	0	1.28	1.47	39	62	79	21	0	1
63628	1	49	0	0	171	78	26.67	3	0	1	0	0	121	68	73	4.9	1.97	5.93	0	1.69	3.6	19	33	52	32	0	1
63635	0	61	0	0	155.5	52.1	21.55	2	0	0	0	0	120	80	76	4.8	1.23	4.31	0	1.73	1.96	10	6	51	11	0	1
63760	1	52	1	1	171.5	73.2	24.89	2	0	1	0	1	129	76	99	9.1	3.16	4.67	0	1.1	2.33	17	28	56	27	0	1
60919	1	51	1	2	156	66.9	27.49	3	1	1	0	0	130	88	85	4.4	3.63	5.33	0	1.2	2.82	32	62	65	42	0	1
60928	0	44	0	0	153.5	46.1	19.57	2	1	0	0	0	130	80	76	4.6	1.26	4.51	0	1.55	2.15	15	5	50	12	0	1
60985	0	40	0	0	155	51.6	21.48	2	0	1	0	0	100	70	80	4.7	1.86	6.25	1	1.58	3.68	25	34	65	13	0	1
61026	1	40	0	0	163.5	65.9	24.65	2	1	1	0	0	135	97	82	5.4	1.87	5.22	0	1.33	2.98	27	46	64	36	0	1
61051	1	42	0	0	175	76.2	24.88	2	0	0	0	0	120	72	68	5.2	0.83	4.38	0	1.27	2.39	16	19	61	17	0	1
61053	0	42	0	0	165	78.4	28.8	3	0	0	0	0	120	80	85	5	0.85	4.11	0	1.55	1.74	15	14	38	15	0	1
61085	1	40	0	0	178	67.5	21.3	2	0	0	0	0	117	77	79	4.7	1.14	5.7	0	1.79	2.58	17	18	56	22	0	1
63669	1	41	0	0	159	70	27.69	3	0	1	1	0	110	77	71	5.2	2.31	4.06	0	0.97	2.39	27	34	92	24	0	1
63901	1	51	0	0	172	71	24	2	0	0	0	1	127	84	75	6.7	0.88	5.33	0	1.5	3.28	27	40	105	36	0	1
63937	0	47	1	1	165	72	26.45	3	0	0	0	0	100	70	70	4.8	1.25	5.1	0	1.49	2.89	19	21	63	47	0	1
63962	0	36	0	0	168	68	24.09	2	0	0	0	0	100	70	79	5.2	1.23	3.98	0	1.54	1.86	20	17	55	10	0	1
63552	1	38	1	2	178	121	38.19	4	1	1	0	1	147	89	83	8.2	3.57	6.49	1	1.14	4.06	24	47	74	72	0	1
63586	1	48	0	0	172.5	82.6	27.76	3	0	1	0	0	114	84	80	5.3	1.75	5.82	0	1.24	3.61	17	25	69	15	0	1
63618	0	45	0	0	158	56.6	22.67	2	1	0	0	0	136	96	78	4.9	1.65	4.72	0	1.61	2.63	13	9	58	14	0	1
63643	1	23	0	0	168.5	47	16.55	1	0	0	0	0	108	67	80	4.6	0.86	5.11	0	1.82	2.88	21	26	66	11	0	1
63909	0	42	0	0	169	71.2	24.93	2	0	0	0	1	106	74	76	5.6	1	4.56	0	1.36	2.57	25	42	40	23	0	1
63918	1	52	1	1	168	72	25.51	3	1	1	0	0	153	95	74	5.3	4.62	6.75	1	1.6	4.06	54	76	65	157	0	1
63952	0	49	0	0	159	58.5	23.14	2	0	0	0	0	100	70	73	4.9	1.05	4.64	0	1.52	2.62	22	18	48	13	0	1
57842	1	28	0	0	178	75.5	23.83	2	1	1	1	1	134	90	85	5.9	1.94	3.49	0	0.89	1.87	15	15	78	33	0	1
57860	1	33	0	0	171	60.2	20.59	2	0	0	0	1	122	66	74	6.2	0.97	6.45	1	1.46	4.26	30	31	65	21	0	1
57910	0	36	0	0	163	49.6	18.67	2	0	0	1	0	106	70	74	4.5	0.97	3.85	0	1.21	1.86	14	8	46	9	0	1
57985	0	48	0	0	158.5	66.2	26.35	3	0	0	1	1	120	80	76	6	0.61	3.48	0	1.22	1.61	16	16	67	12	0	1
58003	0	38	0	0	152	45.1	19.52	2	0	0	0	0	110	74	66	5.2	0.92	4.02	0	1.38	1.8	19	13	43	15	0	1
64333	1	55	1	1	164.5	75.8	28.01	3	1	0	0	1	128	87	76	5.8	1.16	3.94	0	1.53	1.78	24	24	64	20	0	1
64383	1	40	1	2	164.5	70.8	26.16	3	0	1	0	1	124	82	80	6.3	3.08	6.18	1	1.63	3.72	35	89	79	157	0	1
64401	1	42	0	0	171.5	73.2	24.89	2	0	1	1	0	115	76	80	5.1	4.22	4.24	0	1.04	2.13	30	44	73	34	0	1
64433	1	27	0	0	175	69	22.53	2	0	0	0	0	109	60	59	4.8	0.62	4.58	0	1.49	2.63	19	18	69	30	0	1
58097	1	37	0	0	170	65.4	22.63	2	0	0	0	0	111	76	95	5.3	1.54	5.88	0	1.56	3.35	26	18	42	17	0	1
58201	0	31	0	0	163	60.6	22.81	2	0	0	0	1	100	70	62	6.1	1.62	5.52	0	1.7	2.68	20	24	47	20	0	1
58248	1	43	1	1	170	87	30.1	4	0	0	0	0	109	63	68	4.6	0.77	3.55	0	1.12	1.87	28	32	74	38	0	1
58265	1	34	1	2	170.5	80	27.52	3	1	1	1	1	127	86	85	5.9	2.45	4.54	0	1.01	2.79	22	29	61	21	0	1
64400	0	38	0	0	167	76.6	27.47	3	0	0	1	0	100	70	78	4.9	0.73	3.56	0	1.15	1.94	21	18	60	17	0	1
64449	1	26	0	0	187	78	22.31	2	0	0	0	0	117	75	82	4.7	0.82	5.16	0	1.61	3.1	17	15	55	21	0	1
64517	1	36	1	1	182.5	88	26.42	3	0	0	0	0	121	74	68	5	1.29	4.29	0	1.93	1.63	26	20	80	18	0	1
64568	1	44	0	0	172.5	73.3	24.63	2	0	0	0	1	128	81	65	5.9	0.9	4.2	0	1.35	2.21	20	28	74	21	0	1
64649	0	30	0	0	165.5	50.8	18.55	2	0	0	0	0	100	70	76	4.4	1.06	3.73	0	1.37	1.77	15	10	62	9	0	1
64650	0	35	0	0	169	60.2	21.08	2	0	0	0	0	100	70	68	4.9	1.54	4.83	0	1.47	2.78	13	11	53	16	0	1
63388	0	30	0	0	157	50.1	20.33	2	0	0	0	0	120	80	90	4.5	0.54	4.21	0	1.54	1.79	17	11	65	13	0	1
63473	0	33	0	0	155	53.1	22.1	2	0	1	0	0	100	70	77	4.7	2.52	6.93	1	1.49	4.5	19	9	78	23	0	1
63556	1	27	1	1	172	88.6	29.95	3	0	1	0	0	124	79	90	5.1	2.56	6	0	1.31	3.75	28	53	60	27	0	1
63573	1	24	0	0	169	65	22.76	2	0	0	0	0	120	81	80	5.1	0.81	3.8	0	1.4	1.74	14	12	57	28	0	1
58025	0	59	0	0	155	51.3	21.35	2	1	0	0	1	140	100	77	5.6	0.89	6.95	1	1.48	4.74	24	23	68	22	0	1
58040	1	42	0	0	172	63.8	21.57	2	0	0	0	0	124	78	94	4.9	1.69	6	0	1.19	4.23	23	23	71	21	0	1
58057	1	38	0	0	166.5	63.4	22.87	2	1	0	0	1	133	90	88	6.4	1.01	4.13	0	1.35	2.09	26	24	77	21	0	1
58123	0	34	0	0	151.5	50.7	22.09	2	0	0	0	0	100	70	95	5.1	0.71	5.04	0	1.6	2.7	20	16	45	10	0	1
58140	1	30	0	0	166.5	61.6	22.22	2	1	0	0	0	131	82	101	4.9	0.75	3.49	0	1.14	1.7	20	20	73	19	0	1
64259	0	24	0	0	160	45.3	17.7	1	0	0	0	0	96	68	87	5.4	0.79	3.99	0	1.85	1.73	16	8	60	11	0	1
64374	1	48	0	0	167.5	68.7	24.49	2	1	1	0	1	131	83	64	6.1	1.92	3.67	0	1.75	1.54	19	23	81	17	0	1
64389	1	48	1	1	164	74	27.51	3	1	0	0	1	130	81	81	6.3	0.98	4.38	0	1.49	2.18	16	24	74	17	0	1
64423	1	22	0	0	178	65.8	20.77	2	0	0	0	0	129	60	62	4.4	0.77	2.94	0	1.08	1.43	21	20	98	10	0	1
64506	1	43	1	1	172	70.6	23.86	2	0	0	0	0	106	79	76	4.8	0.94	4.75	0	1.51	2.48	45	39	72	19	0	1
64525	1	36	0	0	166	63.2	22.94	2	0	0	0	0	129	68	64	4.7	0.58	3.58	0	1.46	1.62	23	29	95	18	0	1
64348	1	52	0	0	176	80	25.83	3	0	0	0	0	120	79	89	5.5	1.63	5.82	0	1.66	3.31	18	16	81	69	0	1
64415	1	31	0	0	171.5	56.8	19.31	2	0	1	0	0	113	72	83	5.5	1.71	4.38	0	1.36	2.17	19	16	100	16	0	1
64416	1	30	1	1	179	83.6	26.09	3	0	0	0	0	108	69	64	4.6	1.29	4.3	0	1.38	2.16	16	18	69	25	0	1
64565	1	30	0	0	171	67.6	23.12	2	0	0	0	0	118	75	85	5.2	1.41	4.81	0	1.22	2.75	19	25	81	34	0	1
64652	1	46	1	1	171.5	80.2	27.27	3	1	0	0	0	131	85	76	5	1.38	4.22	0	1.35	2.35	19	26	55	38	0	1
65079	0	39	0	0	155	48.2	20.06	2	0	0	0	0	100	70	76	4.6	0.48	3.47	0	1.36	1.6	17	9	33	8	0	1
65190	1	46	0	0	172	76	25.69	3	0	0	0	0	116	83	101	4.4	0.53	3.88	0	1.6	1.75	23	26	50	22	0	1
65249	1	52	0	0	174	70	23.12	2	1	1	0	0	132	82	74	4.7	2.35	5.48	0	1.27	3.54	22	12	71	38	0	1
65290	0	48	0	0	158.5	59.1	23.52	2	0	0	0	0	120	70	76	4.9	1.22	4.96	0	1.72	2.56	14	10	57	15	0	1
65313	1	47	0	0	169	64.2	22.48	2	0	0	0	1	107	77	72	6.3	1.1	4.69	0	1.33	2.8	14	20	56	11	0	1
65388	1	39	0	0	174	65	21.47	2	0	0	0	0	118	77	67	4.1	1.22	3.92	0	1.17	2.24	18	17	59	15	0	1
65481	0	52	0	0	159.5	53.8	21.15	2	0	0	0	0	110	80	70	5.5	0.64	4.38	0	1.79	1.87	25	25	100	59	0	1
58078	0	54	0	0	154	44	18.55	2	0	0	0	0	120	80	95	4.9	1.37	4.95	0	1.42	2.9	28	34	79	9	0	1
58096	1	48	1	1	171.5	97.8	33.25	4	1	0	1	1	143	87	67	5.7	1.41	3.95	0	1.04	2.34	20	32	52	28	0	1
58135	1	58	1	1	171	70.2	24.01	2	1	1	0	1	136	81	107	6	1.92	4.8	0	1.14	3.02	26	29	79	45	0	1
58260	0	30	0	0	163	52.1	19.61	2	0	0	0	0	100	70	64	4.7	0.56	4.42	0	1.41	2.36	27	25	65	35	1	2
58022	0	50	0	0	159.5	61.6	24.21	2	0	0	0	1	120	76	77	6.2	1.66	6.34	1	1.82	3.53	35	37	62	84	0	1
58139	1	34	1	2	171	83	28.38	3	1	0	0	1	134	83	100	6	1.54	3.76	0	1.24	2.25	27	63	77	48	0	1
58190	1	50	1	1	169	83.2	29.13	3	0	1	0	1	123	69	71	6.8	2.46	6.14	1	1.15	3.86	23	42	59	17	0	1
58226	1	50	0	0	176	86.1	27.8	3	0	1	0	1	120	70	81	5.9	5.04	6.18	1	1.48	3.28	24	35	53	58	0	1
58222	0	53	0	0	155	47.9	19.94	2	1	0	0	0	136	80	84	4.8	0.84	5.57	0	1.78	3.01	26	20	61	11	0	1
58243	0	43	0	0	166	62	22.5	2	0	0	0	0	120	80	61	4.3	0.72	5.12	0	1.84	2.38	19	14	47	12	0	1
58288	1	39	0	0	175	73.8	24.1	2	0	1	0	0	127	83	65	4.9	1.96	5.02	0	1.23	2.86	31	44	62	50	0	1
58320	1	37	0	0	178.5	67.7	21.25	2	0	0	0	1	122	75	80	5.6	0.76	4.78	0	1.4	2.67	21	10	47	13	0	1
58411	1	47	1	2	168.5	81	28.53	3	0	1	1	1	119	80	76	6.2	2.84	3.92	0	0.97	1.95	33	40	85	89	0	1
63244	0	24	0	0	163	48.5	18.25	1	0	0	0	0	100	70	89	5	0.5	2.97	0	1.43	1.25	16	17	70	10	0	1
63494	1	28	0	0	166.5	56.4	20.34	2	0	0	0	0	111	66	90	4.9	1.52	4.12	0	1.4	2.13	21	19	72	15	0	1
63835	1	57	0	0	183.5	80.4	23.88	2	1	1	0	1	136	84	86	12.1	5.91	5.63	0	1.14	2.27	112	207	59	142	0	1
63935	0	37	1	1	157.5	72.9	29.39	3	1	1	0	1	126	88	78	6.6	1.99	5.32	0	1.37	3.1	19	26	68	21	0	1
63942	0	59	1	1	165	72.2	26.52	3	0	0	1	1	110	74	96	6.2	1.64	4.19	0	0.96	2.4	25	30	91	33	0	1
64026	1	35	0	0	169	57	19.96	2	0	0	0	0	112	72	71	4.5	1.15	6.7	1	1.74	4.08	25	24	54	13	0	1
64076	1	45	0	0	180	66.8	20.62	2	0	0	0	0	108	55	76	5.5	0.63	4.32	0	1.38	2.52	17	14	78	14	0	1
64119	1	35	0	0	172	72.5	24.51	2	0	0	0	1	121	77	68	5.9	0.96	5.22	0	1.31	3.18	16	20	70	17	0	1
64137	1	46	1	1	166	81.7	29.65	3	0	1	0	0	107	66	66	4.7	3.58	4.48	0	1.14	1.94	24	37	58	36	0	1
64144	0	44	0	0	159.5	62.2	24.45	2	0	0	0	0	110	80	76	5.3	0.58	4.46	0	1.7	2.02	21	26	45	9	0	1
64992	1	36	0	0	179	68.5	21.38	2	0	0	0	0	120	71	75	4.6	1.07	4.09	0	1.61	1.87	15	8	75	16	0	1
65028	1	37	1	2	172	72.6	24.54	2	1	1	0	1	134	88	86	5.8	2.05	4	0	1.31	2.07	25	50	102	47	0	1
65109	0	49	0	0	159	55	21.76	2	0	0	0	0	100	70	64	4.6	1.69	6.31	1	1.66	4.51	24	16	77	17	0	1
61094	1	59	0	0	168.5	65.5	23.07	2	0	0	0	0	119	77	72	4.8	1.38	3.69	0	1.32	1.71	20	21	48	30	0	1
61096	1	58	1	1	167.5	69.4	24.74	2	0	0	0	0	124	71	66	5.3	0.76	4.22	0	1.61	1.87	24	29	60	30	0	1
61119	1	48	1	1	175	83	27.1	3	1	1	0	0	136	86	78	4.9	2.91	6.09	1	1.36	3.45	29	66	70	69	0	1
61126	1	42	1	1	178.5	86.2	27.05	3	0	1	0	0	118	79	74	4.2	2.47	3.76	0	1.14	1.77	43	59	81	60	0	1
61151	0	47	0	0	165	61.6	22.63	2	0	0	0	1	120	80	63	5.6	1.08	5.21	0	2.18	2.64	20	15	53	9	0	1
61155	1	40	0	0	179.5	87.1	27.03	3	0	0	0	0	128	72	79	4.7	1.02	3.88	0	1.34	1.85	16	30	41	31	0	1
64043	0	49	0	0	148	49	22.37	2	0	0	0	0	100	70	87	4.4	0.65	3.85	0	1.63	1.44	20	26	49	11	1	2
64111	1	50	1	2	179	83.4	26.03	3	0	1	0	1	111	80	63	5.7	5.06	4.49	0	1.19	2	18	28	57	88	0	1
64254	0	29	0	0	157	50	20.28	2	0	0	0	0	96	64	59	4.4	0.58	3.32	0	1.47	1.49	19	11	41	11	0	1
64354	0	41	0	0	156.5	57.4	23.44	2	0	0	0	0	100	70	72	4.4	1.12	4.57	0	1.77	2.07	30	27	46	9	0	1
58211	1	35	0	0	178	77.6	24.49	2	1	0	0	1	135	82	74	6.2	0.59	5.79	0	1.69	3.25	28	31	70	40	0	1
58545	1	27	1	2	168	89.5	31.71	4	1	0	0	0	149	79	76	5.1	1.53	6.58	1	1.27	4.41	33	86	67	88	0	1
58845	0	32	1	1	157	56	22.72	2	0	1	0	0	104	70	74	5.5	1.98	4.88	0	1.4	2.44	25	48	71	17	0	1
64716	0	24	0	0	153.5	47.6	20.2	2	0	0	0	0	96	68	76	5.2	0.82	5.22	0	1.91	2.61	21	23	65	12	0	1
64734	0	26	0	0	167	53.9	19.33	2	0	0	0	0	100	70	72	4.4	0.6	4.32	0	1.47	2.08	13	6	30	8	0	1
64765	1	25	0	0	180	74.1	22.87	2	1	0	0	0	119	86	66	4.3	0.56	3.38	0	1.46	1.45	20	10	55	11	0	1
64769	0	37	0	0	160	55.7	21.76	2	0	0	0	0	94	62	73	4.6	0.72	4.28	0	1.77	1.94	18	13	57	9	0	1
64783	0	30	0	0	162	61.2	23.32	2	0	1	0	0	100	70	80	5.2	1.91	4.33	0	1.44	2.31	18	14	63	12	0	1
64801	0	27	0	0	156.5	52.2	21.31	2	0	0	0	0	120	80	69	4	0.57	3.28	0	1.51	1.36	11	12	33	17	0	1
64557	1	32	0	0	183	81	24.19	2	0	0	0	1	113	73	81	6.2	1.53	4.56	0	1.28	2.56	17	21	62	19	0	1
64610	0	49	0	0	166	55.7	20.21	2	0	0	0	0	120	80	80	5.4	1.64	5.63	0	1.49	3.38	28	18	47	13	0	1
64642	1	25	1	2	171	89.4	30.57	4	1	1	0	0	131	81	78	4.7	3.5	6.75	1	1.64	4.02	41	98	67	46	0	1
64691	0	27	0	0	163.5	49.6	18.55	2	0	0	0	0	100	70	84	4.4	0.82	3.63	0	1.56	1.6	19	10	45	11	0	1
64725	0	24	0	0	157	58	23.53	2	0	0	0	1	120	76	61	5.9	0.68	4.31	0	1.67	2.17	24	29	46	12	0	1
63754	0	44	0	0	162	51.4	19.59	2	0	0	0	0	102	74	76	4.6	0.8	5.18	0	1.88	2.51	14	11	20	11	0	1
63807	1	23	0	0	171	56	19.15	2	0	0	0	0	117	84	75	5.1	0.79	4.23	0	1.62	2.04	22	24	40	13	0	1
63822	0	21	0	0	164	53	19.71	2	0	0	1	0	100	70	86	4.7	1.22	4.22	0	1.01	2.42	11	9	48	11	0	1
63824	0	56	0	0	154	53.4	22.52	2	0	0	0	0	100	70	65	5.2	1.11	5.11	0	1.34	3.06	20	14	77	10	0	1
64022	1	41	0	0	163	68.4	25.74	3	0	0	0	0	105	70	80	4.8	1.39	4.58	0	1.46	2.33	17	17	46	21	0	1
58230	1	49	1	1	172	87	29.41	3	1	1	0	0	131	79	71	5.3	2.16	4.77	0	1.26	2.76	22	29	61	42	0	1
58280	1	54	1	2	174.5	85.2	27.98	3	0	1	0	1	119	73	74	5.6	4.73	6.21	1	1.22	3.55	33	57	78	47	0	1
58319	1	37	0	0	178	62.9	19.85	2	0	0	0	0	105	69	73	5.2	0.92	6.33	1	2.02	3.59	21	16	54	20	0	1
58337	0	39	0	0	157	48.2	19.55	2	0	0	0	0	100	70	78	5.2	1.47	5.41	0	1.92	2.54	29	22	54	8	0	1
64668	1	36	0	0	169	68.4	23.95	2	0	1	0	0	121	62	68	4.8	1.88	5.55	0	1.55	3.36	18	25	83	29	0	1
64682	0	34	0	0	162	49.3	18.79	2	0	0	0	0	100	70	79	4.7	0.82	4.02	0	1.7	1.77	15	14	41	13	0	1
64685	0	24	0	0	163	52	19.57	2	0	0	0	0	110	80	69	4.6	0.68	3.28	0	1.3	1.47	19	13	45	10	0	1
64768	1	58	0	0	174	83	27.41	3	1	0	0	0	131	80	59	4.5	1.18	4.08	0	1.11	2.24	19	34	52	23	0	1
64785	1	42	0	0	178.5	74.2	23.29	2	0	1	0	0	117	71	79	4.5	1.7	5.03	0	1.26	3.04	14	16	89	20	0	1
64800	1	40	0	0	163	47.2	17.77	1	0	0	0	0	105	58	68	3.6	0.5	5.33	0	1.77	2.98	17	8	51	14	0	1
64832	1	40	0	0	173.5	72.2	23.98	2	1	1	0	0	143	98	77	4.5	2.5	5.9	0	1.35	3.65	21	26	53	31	0	1
64715	0	26	0	0	153	57	24.35	2	0	0	0	0	100	70	72	4.4	1.6	5.33	0	1.47	2.96	19	13	48	10	0	1
64719	0	25	0	0	158	55	22.03	2	0	0	0	0	100	70	71	4.7	0.87	3.26	0	1.52	1.3	17	14	49	11	0	1
64802	1	28	1	1	170	66.4	22.98	2	0	1	0	0	110	79	90	4.1	2.11	5.47	0	1.22	3.43	19	18	52	18	0	1
64866	0	35	0	0	159	50.2	19.86	2	0	0	0	0	96	64	72	5.1	0.64	3.36	0	1.56	0.87	12	8	43	9	0	1
64966	1	41	0	0	170.5	65	22.36	2	1	0	0	0	160	114	83	5.1	0.87	4.09	0	1.36	2.01	22	24	90	62	0	1
65016	1	46	1	1	182.5	85.5	25.67	3	1	0	0	0	128	85	60	4.4	1.33	5.02	0	1.25	3.07	18	22	105	21	0	1
58641	0	43	0	0	156	60.3	24.78	2	1	0	0	0	148	100	67	5.1	0.91	4.61	0	1.59	2.27	26	20	69	16	0	1
58792	0	40	1	1	154	66.2	27.91	3	1	0	1	0	140	100	79	5.4	0.89	4.06	0	1.11	2.31	26	12	77	25	0	1
63501	1	30	1	2	166	84	30.48	4	1	1	0	0	135	86	78	5	3.18	6.06	1	1.42	3.35	40	86	70	84	0	1
63551	1	37	1	1	171	77.6	26.54	3	0	1	0	1	107	63	83	5.6	3.58	4.35	0	1.29	1.9	50	98	86	123	0	1
63633	1	42	0	0	178	80	25.25	3	1	1	0	0	133	89	109	4.9	2.66	6.15	1	1.37	3.61	26	41	47	47	0	1
63826	1	53	0	0	169	64.4	22.55	2	1	0	0	0	154	84	69	5.3	0.96	5.55	0	1.36	3.49	18	16	118	55	0	1
58318	1	40	0	0	177	87.1	27.8	3	1	0	0	0	138	90	68	5	1.61	5.56	0	1.35	3.58	24	36	41	21	0	1
58399	0	28	0	0	155	49.7	20.69	2	0	0	0	0	110	80	77	5.1	0.81	5.72	0	1.79	2.92	24	17	46	11	0	1
64021	1	35	0	0	169.5	70.8	24.64	2	1	1	1	0	133	99	80	4.5	7.24	4.16	0	0.95	1.57	22	27	60	37	0	1
64028	0	43	0	0	165	60.4	22.19	2	1	0	0	0	144	100	78	4.7	0.72	5.84	0	1.78	3.18	36	37	70	10	0	1
64135	1	52	1	1	168	84.3	29.87	3	0	0	0	0	113	81	68	4.8	0.95	4.27	0	1.12	2.38	29	70	54	61	0	1
64196	1	28	1	1	175.5	80.4	26.1	3	0	0	0	0	119	72	69	5.3	0.98	4.76	0	1.3	2.7	18	26	64	15	0	1
61255	1	41	1	1	177	74	23.62	2	0	1	0	0	117	77	72	4.9	2.43	5.16	0	1.35	2.81	19	20	57	26	0	1
61260	1	40	0	0	173	81.2	27.13	3	0	0	0	0	123	76	69	4.9	0.91	4.11	0	1.12	2.28	16	24	54	21	0	1
61319	0	40	0	0	157	52.2	21.18	2	0	1	0	0	100	70	72	5.3	1.81	5.98	0	1.51	3.37	19	13	53	11	0	1
61330	1	41	0	0	170.5	71.7	24.66	2	0	0	0	0	110	73	61	4.6	0.57	4.88	0	1.42	2.92	26	29	84	16	0	1
61362	0	49	0	0	162	55.8	21.26	2	0	0	0	0	90	60	68	5.2	1.19	5.31	0	2.09	2.26	21	28	99	13	0	1
58312	1	46	1	1	178	77.9	24.59	2	0	1	0	0	127	81	68	5.5	2.3	5.22	0	1.41	2.87	34	33	65	21	0	1
58444	1	32	0	0	178	79.7	25.15	3	1	1	1	1	127	85	117	6	1.85	4.77	0	0.91	3.06	23	25	62	30	0	1
58519	1	49	0	0	173	58.2	19.45	2	0	0	0	0	112	72	68	4.8	0.98	4.88	0	1.67	2.29	30	30	72	19	0	1
58544	1	51	1	2	170.5	92.2	31.72	4	1	1	0	1	142	97	73	6	1.74	4.24	0	1.05	2	24	42	99	30	0	1
58587	0	56	0	0	159.5	59.4	23.35	2	1	0	0	0	126	86	78	5.5	0.91	5.19	0	1.67	2.69	24	17	74	20	1	2
58612	0	23	0	0	171	61.6	21.07	2	0	0	0	0	100	70	77	4.7	0.9	4.58	0	1.77	1.86	23	32	69	15	0	1
64312	1	45	0	0	166.5	73.6	26.55	3	0	1	1	0	115	69	68	5.3	1.94	3.99	0	0.98	2.16	22	27	54	23	0	1
64337	1	34	1	2	175	96	31.35	4	0	0	0	0	120	75	80	5.3	1.11	4.57	0	1.21	2.68	24	34	63	39	0	1
64344	1	39	1	1	172	83	28.06	3	1	0	0	1	127	88	74	6	1.62	4.35	0	1.11	2.52	18	24	48	25	0	1
64405	0	23	0	0	173	68.2	22.79	2	0	0	1	0	100	70	74	4.7	1.19	3.92	0	1.25	2.02	16	12	63	13	0	1
64494	1	54	0	0	169.5	68.2	23.74	2	1	0	0	0	137	87	74	5.2	1.22	4.54	0	1.36	2.42	25	41	52	38	0	1
64505	1	61	0	0	177	80.7	25.76	3	1	0	0	0	136	79	91	5.1	1.29	6.06	1	1.64	3.7	22	23	67	15	0	1
65111	0	53	0	0	156.5	50.7	20.7	2	0	0	0	0	110	70	74	4.7	1.39	6.48	1	1.85	4.08	25	21	86	20	0	1
65158	1	33	1	2	170	89	30.8	4	0	1	0	0	107	73	82	4.1	2.55	4.59	0	1.34	2.29	24	26	64	23	0	1
65175	1	43	0	0	175.5	68	22.08	2	0	1	0	0	109	66	65	4.8	2.25	5.56	0	1.21	3.5	26	31	81	25	0	1
65192	1	50	0	0	179.5	77.5	24.05	2	0	0	0	0	111	79	83	5.1	1.6	5.07	0	1.25	3.24	20	30	94	14	0	1
65245	1	46	0	0	171	80.6	27.56	3	1	0	0	0	128	94	73	5.1	1.14	5.05	0	1.47	2.57	23	33	65	33	0	1
64413	1	49	0	0	177	74	23.62	2	0	0	0	0	105	60	77	4.4	1.12	4.16	0	1.13	2.42	22	29	99	20	0	1
64445	1	37	0	0	175.5	74.2	24.09	2	0	0	0	0	123	75	69	4.2	0.88	3.78	0	1.22	2	35	36	64	33	0	1
64447	0	28	0	0	156	55.4	22.76	2	0	0	0	0	100	70	58	4.5	1.11	4.66	0	1.89	2.28	30	14	47	11	0	1
64522	1	25	0	0	177.5	83	26.34	3	0	0	0	0	124	70	75	5.4	0.94	4.02	0	1.38	1.94	22	29	73	27	0	1
64611	0	36	0	0	156	51.8	21.29	2	0	0	0	0	110	78	67	5.5	0.5	3.72	0	1.63	1.41	22	18	57	10	0	1
64613	1	39	0	0	171	59	20.18	2	1	0	0	1	135	91	92	5.9	0.95	5.87	0	1.68	3.34	15	12	56	15	0	1
64645	0	29	0	0	164.5	59.6	22.02	2	0	0	0	0	100	66	77	4.6	1.6	5.48	0	1.73	2.98	24	56	88	55	0	1
64833	1	43	1	1	170	75.2	26.02	3	0	1	0	0	126	76	84	4.9	1.81	4.23	0	1.28	2.21	28	50	70	58	0	1
64851	0	39	0	0	168	70.5	24.98	2	0	0	0	0	110	70	72	5.3	0.58	3.66	0	1.45	1.86	20	20	44	14	0	1
64919	1	49	1	1	170	76.2	26.37	3	1	0	0	1	155	114	95	6.2	0.93	4.63	0	1.33	2.43	20	22	71	33	0	1
65001	1	58	0	0	169.5	59.6	20.74	2	1	0	0	0	130	82	78	4.1	0.96	4.93	0	1.56	2.67	23	22	120	25	0	1
65183	1	43	1	2	171.5	77.4	26.32	3	0	0	0	0	117	76	92	4.3	1.08	4.26	0	1.38	2.47	27	39	77	26	0	1
64139	1	45	1	1	169	87.2	30.53	4	1	1	0	0	131	79	65	5.2	1.86	5.32	0	1.46	2.92	17	33	64	22	0	1
64239	0	24	0	0	168	52.6	18.64	2	0	0	0	0	120	80	86	4.9	0.61	4.36	0	1.71	2.2	17	9	53	15	0	1
64256	0	28	0	0	165.5	59	21.54	2	0	0	0	0	100	70	60	5.2	0.96	4.49	0	1.4	2.67	18	17	62	15	0	1
65817	1	50	1	2	163	82.6	31.09	4	1	1	0	0	158	99	89	4.8	3.22	5.5	0	1.2	3.31	45	42	77	38	0	1
65824	0	36	0	0	159	50.2	19.86	2	0	0	0	0	110	78	74	4.5	0.7	5.68	0	2.35	2.02	23	17	30	21	0	1
65849	0	65	0	0	155.5	48.1	19.89	2	0	0	0	0	126	80	93	5.4	1.18	5.72	0	1.37	3.5	34	33	105	31	0	1
64793	1	36	1	2	174	66.2	21.87	2	1	1	0	0	127	87	84	4.9	2.8	4.19	0	1.2	1.98	24	39	61	26	0	1
64827	1	33	0	0	171.5	67.2	22.85	2	0	1	0	0	124	77	79	5.2	2.86	6.35	1	1.68	3.86	20	28	39	23	0	1
64844	0	52	1	1	157	68.2	27.67	3	1	0	0	0	130	94	85	5	1.14	5.07	0	1.44	2.73	30	33	56	24	0	1
64861	0	31	0	0	160	55.2	21.56	2	0	0	0	0	100	70	74	4.6	0.59	4.21	0	1.86	2.3	17	10	78	11	0	1
58166	1	55	0	0	174.5	74.2	24.37	2	1	1	0	1	132	76	92	5.6	1.78	4.22	0	1.45	1.75	30	29	76	31	0	1
58233	0	50	0	0	168	69	24.45	2	1	0	0	0	130	86	69	5	0.76	5	0	1.65	2.84	20	21	68	17	0	1
58234	0	23	0	0	159.5	54.2	21.3	2	0	0	0	0	120	80	90	4.3	0.89	3.97	0	1.47	1.7	32	37	73	15	0	1
58366	0	32	0	0	163	50	18.82	2	0	0	0	0	106	74	72	4.7	1.05	4.18	0	1.42	1.98	20	15	47	13	0	1
58466	1	43	1	1	173	89.2	29.8	3	0	0	0	0	116	76	81	5.1	1.17	4.54	0	1.25	2.4	22	28	84	21	0	1
64836	1	43	0	0	176	67.6	21.82	2	1	0	0	1	138	83	88	10.8	1.42	4.81	0	1.19	3.03	23	25	61	15	0	1
64935	1	45	0	0	183	92.3	27.56	3	0	1	0	0	127	80	78	5.4	2.38	5.29	0	1.27	2.97	28	38	69	34	0	1
65000	0	43	0	0	162	57.2	21.8	2	0	0	0	0	100	70	64	4.6	1.15	5.52	0	1.53	3.38	22	15	73	13	0	1
65003	1	39	1	1	166.5	73.8	26.62	3	1	1	0	0	134	83	80	4.3	1.71	5.8	0	1.75	3.5	20	37	95	32	0	1
65100	0	44	0	0	166	68.6	24.89	2	0	0	0	0	120	80	97	5.5	0.89	4.52	0	1.82	2.03	18	17	86	22	0	1
65118	1	37	1	1	166.5	73.8	26.62	3	1	1	0	0	146	99	68	4.3	2.37	6.41	1	1.55	3.66	16	22	90	58	0	1
65019	1	57	0	0	166	52.8	19.16	2	0	0	0	0	104	63	61	4	0.54	4.01	0	1.66	1.77	23	27	54	21	0	1
65083	0	35	1	1	166	75.4	27.36	3	0	0	0	0	120	80	79	4.8	1.31	4.19	0	1.55	2.03	33	51	67	17	0	1
65102	0	51	0	0	157.5	61.3	24.71	2	0	0	0	0	120	80	74	4.7	0.76	4.84	0	1.92	2.28	23	19	67	9	0	1
65120	1	28	0	0	173.5	53.8	17.87	1	0	0	0	0	115	72	75	4.2	0.43	3.35	0	1.59	1.45	21	27	56	18	0	1
65134	1	30	1	2	177.5	89.5	28.41	3	1	0	0	0	134	89	70	4.4	1.2	3.44	0	1.37	1.44	33	61	71	51	0	1
65170	1	56	1	1	170	68	23.53	2	0	1	0	0	125	84	76	4.9	3.49	5	0	1.08	2.68	25	34	61	21	0	1
65234	1	45	1	1	171.5	75.5	25.67	3	0	1	0	0	103	73	81	5	2.02	4.37	0	1.31	2.36	26	25	57	39	0	1
65251	1	48	1	1	170	78	26.99	3	1	1	1	1	136	90	84	5.6	8.65	4.3	0	1.01	1.64	30	44	53	31	0	1
64126	1	52	0	0	162.5	63.3	23.97	2	1	1	0	1	133	87	98	9.1	1.73	5.4	0	1.94	2.44	18	23	49	47	0	1
64194	1	36	1	1	168	91.4	32.38	4	0	1	1	0	119	70	60	4.7	1.79	4.04	0	0.93	2.24	26	37	63	43	0	1
64210	1	38	0	0	168	72	25.51	3	0	0	0	1	121	72	70	5.6	1.16	4.89	0	1.19	2.87	20	22	54	14	0	1
64260	0	26	0	0	154.5	52.2	21.87	2	0	0	0	0	100	70	73	5.5	1.18	4.89	0	1.61	2.67	19	16	40	12	0	1
64403	1	29	0	0	175	73.6	24.03	2	0	1	0	0	104	69	71	4.8	1.77	4.04	0	1.19	2.22	25	31	64	25	0	1
64410	0	29	0	0	158.5	56.8	22.61	2	0	0	1	0	100	70	84	4.5	1.25	4.14	0	1.25	2.27	30	36	46	14	0	1
64414	1	56	1	1	163	72	27.1	3	1	1	0	0	132	86	94	5.4	4.74	5.82	0	1.25	3.54	34	56	89	53	0	1
64439	1	47	1	1	167	73	26.18	3	0	1	0	1	123	84	80	7.8	2.61	5.44	0	1.18	3.38	27	47	59	40	0	1
64519	1	35	1	2	175	96	31.35	4	1	1	0	0	131	75	70	5.2	2.09	5.35	0	1.09	3.32	34	67	83	32	0	1
64698	0	26	0	0	165	52.8	19.39	2	0	0	0	0	100	70	74	4.7	0.49	3.79	0	1.78	1.62	15	12	42	12	0	1
64762	0	28	0	0	167	67	24.02	2	0	0	1	0	110	70	78	4.9	1.33	4.47	0	1.25	2.61	19	16	49	16	0	1
61562	1	50	0	0	168	66.2	23.46	2	0	0	0	0	120	83	74	4.7	1.01	5.14	0	1.5	2.78	14	18	57	15	0	1
61589	1	56	0	0	173.5	90.9	30.2	4	1	0	0	1	140	78	73	8.9	1.66	4.84	0	1.33	2.59	19	24	73	23	0	1
61594	1	50	1	1	166	73.2	26.56	3	1	1	0	1	131	95	109	7.7	5.63	5.1	0	1.08	2.24	30	56	90	63	0	1
61596	1	55	0	0	171.5	67.9	23.09	2	1	0	0	0	138	86	84	5	1.2	6.02	1	2.27	3.44	21	15	108	44	0	1
61655	0	38	1	1	162.5	70.3	26.62	3	0	0	0	0	120	80	70	5.1	1.69	5.26	0	1.5	2.84	15	18	44	12	0	1
58329	1	23	0	0	171.5	57.8	19.65	2	0	0	0	0	100	63	80	4.6	1.15	4.58	0	1.33	2.57	18	14	77	11	0	1
58336	1	37	0	0	179	75.7	23.63	2	0	0	0	0	118	67	85	5.3	0.96	6.01	1	1.44	3.73	22	26	64	13	1	2
58504	0	45	0	0	160	56.5	22.07	2	0	0	0	0	120	80	83	4.8	0.71	6.23	1	2.27	3.14	17	13	40	11	0	1
58529	0	49	0	0	166	62.9	22.83	2	0	1	0	1	110	70	63	5.7	2.12	4.21	0	1.31	1.66	19	14	62	11	0	1
64654	0	30	0	0	166	57.2	20.76	2	0	0	1	0	110	80	88	4.9	1.1	4	0	1.29	2.1	15	12	44	8	0	1
64656	0	29	0	0	157	51.8	21.02	2	0	0	0	0	100	66	72	4.7	0.63	3.54	0	1.54	1.52	15	13	60	12	0	1
64790	0	23	0	0	158.5	50.1	19.94	2	0	0	0	0	104	70	72	5.1	1	4.83	0	1.76	2.16	20	16	58	16	0	1
64811	1	38	0	0	172	80.8	27.31	3	0	1	0	0	121	67	83	5.4	1.88	3.98	0	1.61	1.59	33	35	78	83	0	1
58522	1	36	1	1	168	71	25.16	3	1	0	0	0	125	94	92	5.4	0.81	5.33	0	1.67	2.83	20	19	80	61	0	1
58645	0	40	0	0	162	75	28.58	3	0	0	0	1	108	70	70	5.6	0.67	5.69	0	1.33	3.46	17	12	77	15	0	1
65326	1	45	0	0	171	70.4	24.08	2	0	0	0	0	128	78	71	4.3	1.25	3.96	0	1.08	2.42	15	16	59	11	0	1
65343	0	44	0	0	160	57.6	22.5	2	0	0	0	0	100	70	75	4.8	1.07	5.16	0	1.71	3.07	18	13	56	11	0	1
65462	0	47	1	1	163	75	28.23	3	0	1	1	0	120	80	90	5.5	2.1	5.52	0	1.29	3.46	20	22	82	42	1	2
65479	0	40	0	0	159.5	47.3	18.59	2	0	0	0	0	100	70	86	4.7	0.58	3.06	0	1.52	1.1	18	10	54	12	0	1
65496	1	36	1	2	173.5	81.7	27.14	3	1	1	0	0	136	95	76	5.3	3.12	5.08	0	1.11	3.03	28	37	80	78	0	1
64426	0	28	0	0	167	59.2	21.23	2	0	0	0	0	100	70	86	4.8	1.27	4.82	0	2.12	2.29	19	13	86	11	0	1
64607	1	48	0	0	184	87.4	25.82	3	0	1	0	1	121	81	68	5.8	1.71	5	0	1.26	2.83	27	31	44	41	0	1
64741	0	31	0	0	159	84	33.23	4	0	0	0	1	100	70	74	5.9	0.66	4.41	0	1.56	2.21	19	15	38	10	0	1
58455	1	38	0	0	171	76.3	26.09	3	1	0	0	0	133	90	51	5.3	0.96	4.24	0	1.53	1.92	21	15	57	20	1	2
58530	0	52	0	0	160	60	23.44	2	0	0	0	1	110	80	71	7.7	0.68	6.01	1	2.21	3.09	16	17	85	17	0	1
58673	1	43	1	1	174	86.4	28.54	3	1	0	1	1	136	87	89	14.1	1.36	4.07	0	1.04	2.23	17	20	71	18	0	1
58730	0	24	0	0	162	57	21.72	2	0	1	1	0	100	70	83	5	2.15	4.48	0	1.13	2.22	13	11	48	18	0	1
58321	1	37	0	0	179.5	65.8	20.42	2	1	0	0	0	131	75	96	4.9	0.83	5.19	0	1.61	2.94	21	18	67	8	0	1
58360	0	43	0	0	159	69.8	27.61	3	0	0	1	1	120	80	78	5.9	1.47	4.44	0	1.12	2.66	17	16	45	19	0	1
58639	0	37	0	0	169	64	22.41	2	0	0	0	0	100	70	67	4.7	1.27	4.61	0	1.49	2.44	13	11	86	12	0	1
58828	0	42	0	0	156	59.8	24.57	2	0	0	1	0	120	80	72	4.7	1.58	6.02	1	1.12	3.77	22	22	79	42	0	1
58871	0	42	0	0	164.5	65	24.02	2	0	0	1	0	92	64	75	5	1.57	4.9	0	1.2	2.6	17	14	57	11	0	1
58415	1	41	0	0	166	68.6	24.89	2	0	0	0	0	111	79	79	4.4	1.38	4.97	0	1.16	3.13	27	37	89	33	0	1
58416	1	48	0	0	170	66.2	22.91	2	0	0	0	0	109	73	78	4.7	1.38	5.09	0	1.52	2.74	14	6	88	18	0	1
58465	1	39	1	2	171.5	87.8	29.85	3	1	1	0	1	130	85	82	12.4	13.56	6.68	1	1.24	1.86	34	55	80	62	0	1
58534	0	28	0	0	156	48	19.72	2	0	0	0	0	100	70	55	5.4	0.66	3.75	0	1.44	1.59	17	13	57	11	0	1
58602	1	41	1	1	171	81.1	27.74	3	1	0	0	0	137	89	64	5.3	1.3	5.31	0	1.61	2.68	34	50	50	52	1	2
58665	1	48	0	0	171	76	25.99	3	0	1	0	0	124	83	74	5.2	1.7	5.46	0	1.16	3.28	38	60	67	30	0	1
64942	1	45	0	0	174	72.7	24.01	2	0	0	1	0	108	70	77	5.3	1.3	4.14	0	0.94	2.18	79	83	107	53	0	1
65008	1	59	1	1	180	71.7	22.13	2	1	0	0	0	141	93	84	4.6	0.9	3.95	0	1.55	1.89	18	20	57	42	0	1
65010	1	63	0	0	172	76.6	25.89	3	1	0	0	0	140	71	64	4.9	0.51	4.68	0	1.48	2.62	23	20	121	20	0	1
65078	0	30	1	1	155.5	59.8	24.73	2	0	0	0	0	106	70	72	4.8	1.24	4.12	0	1.39	2.09	27	34	49	23	0	1
65958	1	57	1	2	171	82	28.04	3	1	1	0	1	133	84	84	6.1	2.29	4.84	0	1.34	2.59	21	35	57	60	0	1
65990	0	45	1	1	156	62.8	25.81	3	1	0	0	0	130	84	91	5.3	1.62	4.54	0	1.46	2.54	22	21	76	17	0	1
66051	0	47	0	0	154	55	23.19	2	0	1	1	0	100	70	60	5.5	2.55	5.55	0	1.28	3.41	26	31	66	31	0	1
65201	1	41	1	1	168	70.2	24.87	2	0	0	0	0	119	73	64	4.6	1.57	4.06	0	1.46	1.89	21	28	85	21	0	1
65202	1	41	0	0	172	62.7	21.19	2	0	0	0	0	105	64	71	5.1	0.57	4.12	0	1.43	1.96	11	8	52	12	0	1
65220	1	49	1	1	159	72.7	28.76	3	0	1	0	0	103	76	84	3.9	2.83	4.32	0	1.05	1.9	26	28	81	20	0	1
65252	1	52	1	1	164.5	61.6	22.76	2	1	1	0	0	157	96	67	5.1	2.87	7.05	1	1.64	4.66	21	18	72	25	0	1
65269	1	56	1	1	168.5	71.2	25.08	3	0	0	0	1	112	73	73	7.3	1.46	5.86	0	1.3	3.71	27	31	54	55	0	1
65270	1	37	0	0	171.5	75.8	25.77	3	0	0	0	0	116	74	68	5.2	1.44	5.48	0	1.78	2.97	24	33	49	52	0	1
65337	0	35	0	0	165	53.1	19.5	2	0	0	0	0	100	70	81	4.4	0.62	4.44	0	1.79	2.12	16	13	63	11	0	1
65287	1	50	1	2	174.5	75.2	24.7	2	1	1	0	0	119	88	92	5.3	3.6	4.74	0	1.07	2.62	21	24	75	44	0	1
65334	0	47	0	0	165.5	47.9	17.49	1	0	1	0	0	110	80	67	4.5	2.19	5.1	0	1.52	2.74	25	25	86	48	0	1
65369	1	55	0	0	167.5	68.7	24.49	2	0	1	0	0	124	81	69	4.7	2.3	4.53	0	1.16	2.58	22	23	69	56	0	1
65437	1	36	0	0	167	55	19.72	2	0	0	0	0	106	84	86	5.1	1.29	4.92	0	1.25	2.78	18	28	61	22	0	1
65451	1	45	1	2	175.5	76.6	24.87	2	1	1	0	0	133	82	66	5.5	4.61	4.21	0	1.09	1.66	17	19	99	38	0	1
64319	1	36	1	1	171	74	25.31	3	0	1	0	0	115	74	95	4.8	2.16	6.19	1	1.33	3.95	26	36	66	42	0	1
64430	1	26	0	0	173.5	61.7	20.5	2	0	0	0	0	116	70	65	4.6	0.75	3.11	0	1.22	1.44	27	26	81	15	0	1
64512	0	28	0	0	169	65.8	23.04	2	0	0	0	0	100	70	74	5.1	1.05	4.62	0	1.78	2.09	19	19	74	12	0	1
58242	1	43	1	2	177	79.6	25.41	3	0	1	0	0	129	79	82	4.9	3.19	6.23	1	1.2	3.96	38	61	74	31	0	1
58259	0	49	1	1	164.5	65.8	24.32	2	0	0	0	0	126	84	61	5.3	1.15	5.44	0	1.46	3.33	45	80	77	13	0	1
58340	1	48	0	0	178.5	85.2	26.74	3	0	1	0	0	127	82	73	5.3	1.76	6.56	1	1.5	4.48	20	25	56	24	0	1
58393	1	44	1	1	170	79	27.34	3	0	1	1	1	126	79	85	5.8	8.75	4.83	0	0.98	1.41	36	58	93	32	0	1
58608	1	25	1	1	172	86.1	29.1	3	0	0	1	0	106	61	60	5	1.19	3.91	0	0.88	2.1	27	59	70	41	0	1
65153	1	33	0	0	163	59.8	22.51	2	0	0	0	0	117	71	78	4.2	0.82	3.99	0	1.3	2.13	26	37	71	12	0	1
65168	1	48	1	1	167.5	69.8	24.88	2	0	0	0	0	116	81	69	3.9	1.68	4.26	0	1.34	2.24	20	20	67	32	0	1
65185	1	41	0	0	174	82.8	27.35	3	1	0	0	0	136	88	66	5.3	1.09	7.77	1	1.42	5.67	18	32	75	34	0	1
65200	1	47	0	0	162.5	62.6	23.71	2	0	0	0	0	105	65	57	4.5	0.84	5.31	0	1.14	3.35	38	65	58	40	0	1
65203	1	48	0	0	168.5	66.6	23.46	2	0	0	0	0	123	80	85	5.1	1.67	6.16	1	1.51	3.7	27	31	76	29	0	1
65236	1	41	0	0	158	57.3	22.95	2	1	0	0	0	131	80	68	5	1.63	5.32	0	1.32	2.8	18	17	96	24	0	1
65250	1	47	0	0	171.5	68.5	23.29	2	1	0	0	0	131	67	89	5.2	0.72	3.4	0	1.22	1.66	14	13	74	14	1	2
64446	0	33	0	0	166	55.9	20.29	2	0	0	0	0	110	74	85	5	1.04	3.84	0	1.76	1.66	17	11	25	11	0	1
64514	1	38	1	1	165.5	68.6	25.05	3	0	1	0	0	124	70	82	4.9	3.26	7.73	1	1.66	4.63	22	45	60	69	0	1
64614	0	64	0	0	150	43	19.11	2	0	0	0	0	100	70	62	4.7	1.58	5.53	0	1.4	3.23	23	19	123	27	0	1
64639	0	30	0	0	150	52.8	23.47	2	0	0	0	1	100	70	80	5.9	0.82	4.99	0	1.76	2.47	22	18	45	15	0	1
64689	0	25	0	0	157.5	56.4	22.74	2	0	0	0	0	100	70	74	4.5	0.68	3.95	0	1.39	1.98	17	13	47	9	1	2
64696	0	30	0	0	166	62.7	22.75	2	0	0	0	0	100	70	72	4.9	0.63	3.6	0	1.41	1.9	16	12	50	12	0	1
64787	1	52	0	0	168	62.6	22.18	2	0	0	0	1	93	60	85	6.6	1.47	4.37	0	1.14	2.35	17	22	82	24	0	1
64798	1	28	0	0	172	72	24.34	2	0	1	0	0	115	76	92	4.4	2.32	3.11	0	1.29	1.13	14	13	54	12	0	1
64837	0	33	0	0	158	46.8	18.75	2	0	0	0	0	100	70	80	5.2	0.56	3.65	0	1.65	1.53	27	31	49	11	1	2
64898	1	48	0	0	167	64.5	23.13	2	1	0	0	0	140	86	85	4.6	0.91	4.66	0	1.35	2.52	15	28	66	23	0	1
64948	0	48	0	0	165.5	70.7	25.81	3	1	0	0	1	144	100	84	5.7	1.01	6.36	1	1.71	3.76	25	21	39	16	0	1
65843	0	23	0	0	164	57	21.19	2	0	0	0	0	100	70	78	4.6	0.98	4.46	0	1.61	2.02	19	24	66	10	0	1
65962	0	56	0	0	163	70	26.35	3	1	0	0	1	160	100	68	6.4	0.65	3.42	0	1.48	1.74	13	8	82	11	0	1
61696	1	44	1	2	168	75.5	26.75	3	0	1	0	1	108	67	91	7.7	3.88	5.6	0	1.22	3.36	16	24	53	28	0	1
61730	0	39	0	0	154	72.6	30.61	4	0	0	0	0	100	70	76	4.5	0.97	4.37	0	1.91	1.99	19	18	63	15	0	1
61789	0	37	0	0	159	48.6	19.22	2	0	0	0	0	100	70	71	4.7	0.52	3.87	0	1.53	1.87	22	25	44	19	0	1
61798	0	38	0	0	168	57	20.2	2	0	0	0	0	100	70	72	4.4	0.8	4.48	0	1.63	2.2	19	21	39	15	0	1
61823	0	40	1	1	156	53.9	22.15	2	1	1	1	0	130	84	80	5	4.67	4.19	0	0.96	1.62	16	13	45	30	0	1
64809	1	38	1	1	177.5	90.7	28.79	3	0	1	0	0	116	73	74	4.9	2.3	5.23	0	1.11	3.3	20	29	92	20	0	1
64841	0	24	0	0	168	57	20.2	2	0	0	0	0	100	70	76	4.5	0.78	3.42	0	1.47	1.6	17	12	49	13	0	1
64892	1	30	0	0	164	55.4	20.6	2	0	0	0	0	114	74	67	4.8	1.45	5.17	0	1.72	2.62	17	12	46	15	0	1
64941	1	31	0	0	175	77.4	25.27	3	1	0	0	1	121	89	96	5.7	1.4	5.36	0	1.79	2.51	26	44	88	26	0	1
64856	0	31	0	0	156.5	59.6	24.33	2	0	0	0	0	106	72	83	5.4	0.98	5.15	0	1.34	2.94	22	33	50	72	0	1
64947	1	50	1	1	169	78.8	27.59	3	0	0	0	1	117	67	84	5.8	1.67	6.29	1	1.42	3.95	27	46	56	27	0	1
65015	0	52	1	1	166	64.4	23.37	2	1	0	1	0	130	86	67	4.3	1.42	4.03	0	1.1	2.39	24	27	61	16	0	1
65020	1	56	0	0	162	58.1	22.14	2	0	1	0	0	121	74	76	4.6	1.86	6.47	1	1.52	4.04	23	25	68	111	0	1
65122	1	39	0	0	187	81.9	23.42	2	0	1	0	0	124	84	85	5	2.02	4.72	0	1.29	2.57	23	23	71	28	0	1
65124	1	35	0	0	168.5	64.8	22.82	2	0	1	0	0	113	64	83	4.5	1.98	6.23	1	2.09	3.26	29	36	122	79	0	1
58458	1	65	1	2	166.5	89.7	32.36	4	0	0	0	0	126	68	77	5	1.57	6.33	1	1.28	4.4	31	23	47	57	0	1
58675	1	42	1	1	168.5	64.5	22.72	2	1	1	0	0	130	87	91	5.3	1.75	5.92	0	1.39	3.42	18	25	116	54	0	1
58741	1	57	0	0	173.5	71.7	23.82	2	0	0	0	0	119	76	71	4.9	1.06	4.74	0	1.43	2.31	19	16	58	62	0	1
58794	1	59	1	1	170	78.3	27.09	3	0	1	1	0	121	56	79	5	3.43	4.11	0	1.01	1.86	29	25	77	43	0	1
65387	1	37	0	0	175.5	63.6	20.65	2	0	0	0	0	107	67	85	5	1.35	5.19	0	1.28	3.13	25	36	73	130	0	1
65401	1	39	0	0	166	70.8	25.69	3	0	1	0	1	96	63	68	5.6	5.07	5.02	0	1.13	2.36	28	62	86	134	0	1
65470	0	61	0	0	156.5	55.2	22.54	2	1	0	0	1	132	84	74	5.7	0.92	5.08	0	1.64	2.85	22	15	71	12	0	1
58623	0	36	0	0	168	62.8	22.25	2	0	0	0	0	100	70	76	5	1.31	4.96	0	1.4	2.7	19	16	57	15	0	1
58773	1	44	1	1	167	80.2	28.76	3	1	0	0	0	131	89	62	5.5	1.57	5.55	0	1.36	3.34	23	28	79	21	0	1
58837	1	22	0	0	177	80	25.54	3	1	0	0	0	138	82	102	4.9	1.2	4.61	0	1.26	2.4	27	39	64	25	0	1
58873	0	41	0	0	160	59.6	23.28	2	0	0	0	0	104	70	61	5.1	0.69	5.19	0	2.17	2.52	18	17	36	20	0	1
58905	1	45	0	0	164	58.1	21.6	2	0	0	0	0	123	77	65	5	1.01	4.63	0	1.24	2.51	16	15	70	18	0	1
66083	0	36	0	0	159	59	23.34	2	0	0	0	0	100	70	71	4.6	0.64	4.9	0	2.21	2.15	15	14	60	11	0	1
66115	1	61	0	0	176	93.7	30.25	4	0	0	0	1	127	65	85	7.3	0.71	3.6	0	1.06	2.05	17	24	65	13	0	1
66117	0	43	0	0	171	61.3	20.96	2	0	0	0	0	100	70	80	4.7	0.63	4.32	0	1.61	2.18	20	17	61	11	0	1
66126	1	57	1	2	181	91.6	27.96	3	1	1	0	0	137	83	64	4.9	2.23	4.25	0	1.32	2.13	17	18	37	47	0	1
66224	1	46	1	2	176.5	105.6	33.9	4	1	0	0	0	134	88	69	4.6	1.23	5.73	0	1.34	3.21	20	36	70	49	0	1
65161	1	27	0	0	171	69.4	23.73	2	0	0	0	0	99	67	56	4.2	0.75	3.61	0	1.59	1.55	12	11	51	12	0	1
65193	1	48	1	1	156	59.8	24.57	2	1	1	0	0	124	98	100	4.8	2.31	5.65	0	1.09	3.67	25	26	103	31	0	1
65244	1	50	1	1	173	83.7	27.97	3	1	1	0	1	136	83	84	6.2	2.25	5.51	0	1.21	3.89	26	40	57	49	0	1
65259	1	44	0	0	174.5	72	23.65	2	0	1	0	0	116	68	92	5.3	1.79	4.97	0	1.37	3.18	26	32	69	40	0	1
65327	0	34	0	0	158	58.6	23.47	2	0	0	0	0	110	70	75	4.9	0.6	4.71	0	1.5	2.76	30	35	64	13	0	1
65342	0	46	1	1	168	67	23.74	2	0	0	1	0	120	80	67	4.8	1.56	5.06	0	1.27	3.33	19	18	56	24	0	1
64655	0	35	0	0	165	63.9	23.47	2	0	1	0	0	106	74	82	5	1.88	5.8	0	1.66	2.97	17	22	65	17	0	1
64669	1	30	1	1	171	79	27.02	3	0	0	0	0	117	73	71	4.2	1.34	5.53	0	1.56	3.35	25	43	59	23	0	1
64673	0	29	0	0	162	62	23.62	2	0	0	1	0	100	70	79	4.6	0.79	3.73	0	1.19	1.92	18	18	66	10	0	1
64680	0	25	0	0	160	58.8	22.97	2	0	0	1	0	100	70	73	4.4	0.4	3.79	0	1.15	2.08	19	16	50	15	0	1
64723	0	35	0	0	173	62	20.72	2	0	0	0	0	110	70	72	4.4	0.82	4.75	0	1.56	2.35	21	17	53	19	0	1
58517	0	44	0	0	162	54.2	20.65	2	0	0	0	0	110	74	76	5.2	0.75	4.83	0	1.45	2.61	22	21	81	15	0	1
58599	1	48	1	1	171.5	88.2	29.99	3	1	1	0	0	125	90	80	5	2.67	5.57	0	1.12	3.19	25	44	81	30	0	1
58635	0	49	0	0	155	49	20.4	2	0	0	0	0	110	70	72	4.6	0.6	5.18	0	1.81	2.55	24	21	58	18	0	1
58668	1	30	1	1	171	70.8	24.21	2	0	0	0	0	108	76	78	5.3	0.9	5.46	0	1.38	3.34	29	73	63	77	0	1
58718	0	55	0	0	165	50.9	18.7	2	0	0	0	0	96	68	62	4.4	0.64	5.48	0	2.09	2.52	25	19	91	13	0	1
58900	1	48	1	1	164.5	67.2	24.83	2	1	0	1	1	122	86	66	6.7	1.6	3.8	0	0.98	1.94	27	42	41	33	0	1
65752	1	51	0	0	164	72.2	26.84	3	1	1	0	0	138	85	77	5.5	2.03	4.76	0	1.67	2.34	19	34	92	110	0	1
64703	0	32	0	0	164	60.7	22.57	2	0	0	0	0	100	70	74	5.4	0.77	3.52	0	1.32	1.69	18	19	46	21	0	1
64739	0	31	0	0	165	52.7	19.36	2	0	0	1	0	100	70	72	4.6	0.44	3.96	0	1.17	2.06	27	38	49	51	0	1
64789	1	50	0	0	171.5	63.8	21.69	2	1	0	0	0	150	100	108	4.9	0.87	5.13	0	1.56	3.01	15	9	103	33	0	1
64803	1	24	0	0	165.5	48.4	17.67	1	0	0	0	0	111	71	80	4.4	0.86	3.72	0	1.4	1.79	23	33	62	39	0	1
64821	0	33	0	0	158	46.4	18.59	2	0	0	0	0	110	70	79	5	0.61	5.43	0	2.28	2.69	18	12	58	10	0	1
64846	0	45	0	0	161	70.4	27.16	3	0	0	1	1	110	80	72	5.6	1.16	3.96	0	1.09	2.35	17	19	47	12	0	1
64871	0	50	0	0	152.5	62.2	26.75	3	0	1	0	0	128	76	74	4.9	2.57	6.77	1	1.96	4.01	25	25	91	15	0	1
65005	1	62	1	2	171.5	82.8	28.15	3	1	1	0	1	134	85	76	6	2.2	5.61	0	1.32	3.43	25	28	87	38	0	1
65080	0	31	0	0	162	52.4	19.97	2	0	0	0	0	100	70	62	4.3	0.54	4.59	0	1.79	2.33	18	7	77	8	0	1
65137	1	40	1	1	173	90	30.07	4	0	1	0	0	125	78	80	4.6	1.83	4.58	0	1.14	2.83	22	27	61	21	0	1
65155	1	36	0	0	188	70	19.81	2	0	0	0	0	122	77	81	5.1	0.43	2.84	0	1.46	1.16	24	23	93	43	0	1
65205	1	49	0	0	170	72	24.91	2	1	1	0	0	136	92	87	5.2	3.78	6.33	1	1.23	3.35	23	25	75	58	0	1
65223	1	54	1	1	166	63	22.86	2	0	0	0	0	117	71	93	5.3	1.3	4.84	0	1.21	2.87	24	38	83	26	0	1
65255	1	50	1	1	169	72.4	25.35	3	1	1	0	0	136	77	65	4.6	10.95	8.12	1	1.37	3.64	21	26	68	81	0	1
66045	0	56	0	0	157.5	48.8	19.67	2	0	0	0	0	100	70	72	5	0.71	4.35	0	1.81	2.13	20	23	61	10	0	1
66047	1	60	1	2	163.5	68.7	25.7	3	1	1	0	1	155	94	77	11.4	3.01	5.41	0	1.11	3.07	25	36	78	132	0	1
66077	0	59	1	2	160	70.7	27.62	3	1	0	0	0	124	88	76	5.5	1.2	4.28	0	1.38	2.45	25	29	77	37	0	1
66147	1	43	0	0	168	72.2	25.58	3	0	0	0	0	115	69	70	4.4	1.22	5.74	0	1.39	3.51	26	33	92	20	0	1
66179	0	49	1	2	165.5	75	27.38	3	1	1	1	1	144	90	60	7.4	1.99	3.75	0	1.16	1.89	27	36	49	39	0	1
66181	0	43	0	0	158.5	59.9	23.84	2	0	0	0	0	100	70	76	4.5	1.27	5.97	0	1.81	3.54	16	12	45	13	0	1
66194	0	48	0	0	155	56	23.31	2	0	0	0	0	120	80	82	4.5	1.09	4.83	0	1.64	2.73	18	17	76	46	0	1
61857	1	38	1	1	172.5	70.3	23.63	2	0	0	0	0	110	65	61	4.8	1.53	5.54	0	1.43	3.6	23	29	53	25	0	1
61887	1	34	0	0	174	82	27.08	3	1	1	0	0	130	86	75	4.9	4.63	5.2	0	1.11	2.34	35	92	112	364	0	1
61896	1	37	0	0	172.5	66	22.18	2	0	0	0	0	108	67	69	5.2	0.71	4.6	0	1.25	2.61	22	32	38	14	0	1
61898	0	34	0	0	162	53.9	20.54	2	0	0	0	0	120	80	78	5.1	0.79	4.9	0	1.78	2.28	28	31	38	12	0	1
61923	1	34	0	0	171.5	60.3	20.5	2	0	0	0	0	114	78	88	5.3	1.13	4.86	0	1.65	2.45	16	20	45	19	0	1
61996	1	34	1	1	169	72.4	25.35	3	1	0	1	1	144	96	87	5.6	1.4	3.06	0	0.95	1.44	31	63	42	51	0	1
62032	1	29	0	0	175	73.3	23.93	2	0	0	0	0	123	72	68	4.5	0.85	3.74	0	1.43	1.88	22	31	35	31	0	1
58659	1	44	0	0	162.5	59.8	22.65	2	0	1	0	0	124	78	61	5.1	1.82	5.3	0	1.7	2.44	22	18	66	30	0	1
58742	1	56	1	2	171	103	35.22	4	1	1	0	1	153	101	104	5.7	2.56	4.99	0	1.1	2.88	26	24	67	86	0	1
58908	1	28	0	0	164	67.6	25.13	3	0	0	0	0	121	78	68	5	1.01	4.58	0	1.25	2.52	19	24	62	15	0	1
58961	0	58	1	1	149.5	62	27.74	3	0	0	1	1	120	80	71	11.7	1.33	4.54	0	1.06	2.51	25	34	98	26	0	1
59008	0	57	0	0	157.5	54.4	21.93	2	0	0	0	0	124	70	72	5.5	1.04	5.62	0	2.3	3	18	13	58	12	0	1
65267	1	50	0	0	178	67	21.15	2	0	0	0	0	114	68	74	4.7	0.59	4.07	0	1.51	2.08	20	15	103	15	0	1
65285	1	38	1	2	172.5	87.2	29.3	3	1	1	0	1	149	84	91	8	5.34	4.94	0	1.19	2.38	20	29	75	40	0	1
65300	0	45	0	0	160	50.1	19.57	2	0	0	0	0	100	70	72	5.1	0.93	4.74	0	1.7	2.49	15	11	42	14	0	1
65318	1	33	1	2	169.5	66.7	23.22	2	0	0	0	0	105	73	72	5.4	1.06	4.91	0	1.32	3.08	22	39	75	82	0	1
65354	1	27	0	0	177	72.8	23.24	2	0	1	0	0	108	71	65	4.6	2.39	3.84	0	1.06	2.06	16	14	75	14	0	1
65367	1	32	0	0	174.5	67.7	22.23	2	0	0	0	0	117	78	70	4.1	0.68	3.76	0	1.17	1.9	17	11	68	10	0	1
65418	0	43	0	0	155	55	22.89	2	0	0	0	0	104	70	76	4.9	1.07	4.48	0	1.48	2.04	20	21	56	13	0	1
65435	0	38	0	0	159.5	73.2	28.77	3	0	1	0	0	100	70	78	4.9	2.13	5.57	0	1.55	2.96	30	52	65	55	0	1
65009	1	53	0	0	173	62.2	20.78	2	0	0	0	0	106	69	62	3.9	1.02	4.01	0	1.21	2.2	19	13	73	16	0	1
65011	1	49	0	0	168	57.3	20.3	2	0	0	0	0	111	72	79	4.7	1.23	3.74	0	1.14	2.29	18	15	61	19	0	1
65026	1	47	1	2	174.5	79.4	26.08	3	0	1	0	0	111	69	89	4.5	1.88	4.61	0	1.32	2.41	14	13	54	16	0	1
65126	1	39	1	2	169	77	26.96	3	0	0	1	0	120	83	76	5.2	0.98	3.82	0	0.98	2.15	18	22	63	23	0	1
65143	1	39	0	0	171.5	67.4	22.92	2	0	0	0	0	121	78	75	4.8	1.05	3.23	0	1.06	1.59	20	29	72	16	0	1
65160	1	34	0	0	170	65.2	22.56	2	0	1	0	0	117	75	79	5.3	2.18	3.71	0	1.09	1.94	34	68	72	130	0	1
65177	1	41	0	0	163.5	60.3	22.56	2	0	0	0	0	109	73	74	4.8	0.98	4.02	0	1.26	2.11	22	19	54	10	0	1
66037	1	52	0	0	173.5	67.2	22.32	2	0	0	0	1	87	67	103	5.6	1.05	5.01	0	1.89	2.7	23	15	53	15	0	1
65149	1	34	1	2	169.5	85	29.59	3	0	1	0	0	120	76	75	5.4	1.82	5.15	0	1.53	2.83	28	45	99	52	0	1
65179	1	44	1	1	172.5	80	26.89	3	0	0	0	0	121	73	81	3.8	1.37	5.07	0	1.31	3.09	39	55	60	72	0	1
65215	1	46	1	2	175.5	90.1	29.25	3	0	0	0	0	129	80	73	4.4	1.43	5.85	0	1.33	3.88	35	56	73	55	0	1
65224	1	56	0	0	171.5	65.5	22.27	2	0	1	0	0	102	69	71	4.8	8.24	5.79	0	1.22	2.78	8	18	88	27	0	1
65281	1	49	1	2	176.5	88.2	28.31	3	1	0	0	0	119	87	88	4.6	0.84	4.32	0	1.37	2.33	33	64	67	52	0	1
65324	0	28	0	0	158.5	51.8	20.62	2	0	0	0	0	100	70	72	4.3	1.25	5.25	0	1.39	3.31	15	8	38	11	0	1
65349	1	29	0	0	173	59	19.71	2	0	1	0	0	104	64	76	4.7	2.15	4.35	0	1.35	2.35	16	20	64	22	0	1
65358	1	41	0	0	173	66.4	22.19	2	1	0	0	0	120	87	79	5.1	1.33	5.48	0	1.92	2.82	35	56	64	17	0	1
58483	1	38	0	0	170.5	71.6	24.63	2	0	1	0	0	124	76	67	5.1	3.54	4.32	0	1.07	1.8	29	33	57	44	0	1
58551	1	57	1	1	171.5	69.4	23.6	2	1	1	0	0	136	85	77	4.6	2.34	4.88	0	1.28	2.45	25	28	57	16	0	1
58601	1	24	0	0	175	59.8	19.53	2	0	0	0	0	124	64	74	4.8	0.7	4.06	0	1.82	1.54	24	26	63	17	0	1
58633	0	44	1	1	156	62.2	25.56	3	0	0	0	0	126	80	78	5	1.15	5.12	0	1.56	2.85	35	43	62	46	0	1
66317	0	34	0	0	156	55	22.6	2	1	1	0	0	146	94	79	4.8	1.91	4.86	0	1.5	2.13	19	19	81	11	0	1
66360	0	44	0	0	162	63.2	24.08	2	0	0	0	0	100	70	76	5.1	1.39	4.87	0	1.82	2.4	16	12	57	17	0	1
66383	1	37	1	1	171	80.4	27.5	3	0	1	0	0	120	78	84	4.7	3.53	5.07	0	1.23	2.81	36	38	85	92	0	1
66394	1	30	0	0	171.5	70.4	23.94	2	0	0	0	0	111	71	88	4.7	0.71	4.05	0	1.49	1.94	25	24	57	21	1	2
65359	1	58	1	1	171	76.3	26.09	3	0	0	0	0	116	80	81	5	0.95	4.32	0	1.13	2.67	26	35	71	54	0	1
65378	1	28	0	0	168.5	84.4	29.73	3	0	0	0	0	120	81	75	4.6	1.12	5.33	0	1.3	3.38	18	17	94	15	0	1
65395	1	28	1	1	170	72.7	25.16	3	1	0	0	0	127	92	91	4.3	1	5.25	0	1.46	2.99	25	48	65	34	0	1
65410	1	38	1	1	169	74	25.91	3	1	0	0	1	134	88	69	6.7	1.47	3.22	0	1.1	1.41	21	31	34	29	0	1
65461	0	40	0	0	161	55	21.22	2	0	0	0	0	100	70	74	4.7	0.5	3.29	0	1.43	1.6	17	13	88	16	0	1
65478	0	50	0	0	157.5	48.1	19.39	2	0	0	0	0	94	60	72	4.7	1.35	5.58	0	1.46	3.32	22	12	63	11	0	1
65805	0	30	1	2	170.5	98.4	33.85	4	0	1	0	0	100	70	76	4.3	3.33	5.03	0	1.31	2.66	30	46	54	20	1	2
65938	1	50	1	1	163	79.1	29.77	3	1	1	0	0	124	88	80	5.5	2.23	5.08	0	1.28	3.17	17	26	48	48	0	1
65955	0	49	0	0	162.5	53.8	20.37	2	1	0	0	0	130	80	54	4.8	1.56	5.47	0	1.8	2.99	25	31	58	28	0	1
66055	1	53	0	0	164.5	71.8	26.53	3	0	1	1	1	120	73	75	6.7	3.54	4.34	0	0.99	2.35	21	28	47	34	0	1
66138	0	44	0	0	160	57.4	22.42	2	0	0	0	0	100	70	72	4.5	1.11	4.05	0	1.47	1.97	22	20	45	18	0	1
64848	1	31	1	1	176	87.6	28.28	3	1	0	0	1	138	85	69	5.9	1.61	4.69	0	1.31	3.13	17	17	54	24	0	1
64855	0	28	0	0	164	47.6	17.7	1	0	0	0	0	100	70	80	4.4	0.6	4.74	0	1.82	2.27	14	10	61	15	0	1
64862	0	23	0	0	152	44.5	19.26	2	0	0	0	0	96	68	66	4.8	0.6	4.01	0	1.59	2.03	19	12	50	15	0	1
64873	1	23	0	0	177	92	29.37	3	1	1	0	1	133	88	126	5.7	3	4.81	0	1.29	2.86	24	46	95	52	0	1
64962	1	35	1	1	178	89.9	28.37	3	0	1	0	1	110	65	83	5.7	1.84	6.08	1	1.39	3.77	18	23	54	20	0	1
65023	1	42	0	0	168	74	26.22	3	0	0	0	0	124	78	120	5.4	1.41	5.09	0	1.58	2.99	23	38	64	30	0	1
65037	0	32	0	0	157	47.9	19.43	2	0	0	0	0	100	70	67	5	0.87	4.25	0	1.6	2.08	16	12	59	10	0	1
58843	0	39	0	0	162.5	53.5	20.26	2	0	0	1	0	100	70	76	5	0.85	4.58	0	1.28	2.38	14	12	58	11	0	1
58926	1	36	0	0	170.5	76.6	26.35	3	0	1	0	0	107	69	80	5.2	2.2	5.7	0	1.09	3.42	23	25	56	23	0	1
58928	1	54	0	0	172.5	82.3	27.66	3	1	1	0	0	144	85	96	5.3	1.8	5.44	0	1.26	3.24	16	13	67	24	0	1
58941	1	41	1	2	172.5	92.6	31.12	4	0	1	1	1	122	82	82	5.6	6.37	4.08	0	0.9	1.38	36	47	56	93	0	1
59026	0	52	0	0	169.5	70.2	24.43	2	0	0	0	0	110	76	69	5.2	1.05	4.13	0	1.46	2.04	25	23	82	13	0	1
58913	1	52	1	1	162	69.5	26.48	3	1	1	0	1	139	86	105	11.1	6.13	5.83	0	1.13	2.64	10	14	103	39	0	1
58915	0	32	0	0	156	51.1	21	2	0	0	0	0	100	70	81	4.5	0.81	3.71	0	1.49	1.55	21	17	57	20	0	1
58920	1	58	0	0	163	60.6	22.81	2	0	0	0	0	117	69	70	4.4	0.97	4.8	0	1.74	2.33	33	30	65	15	0	1
60885	0	41	0	0	165	60.8	22.33	2	0	0	0	0	96	66	79	5.2	0.67	4.52	0	1.5	2.29	14	20	39	8	0	1
65266	1	49	0	0	171.5	82	27.88	3	0	1	0	0	120	78	75	4.8	8.41	5.66	0	1.36	2.11	22	27	68	58	0	1
65273	0	28	0	0	165.5	48.7	17.78	1	0	0	0	0	100	70	72	4.7	0.66	4.1	0	1.82	1.88	19	15	85	18	0	1
65316	1	36	0	0	171.5	67.6	22.98	2	0	0	0	0	111	69	79	4.9	1.47	4.87	0	1.32	3.03	29	42	69	38	0	1
65341	0	31	0	0	163	49	18.44	1	0	0	0	0	100	70	83	4.6	0.66	4.62	0	2.15	1.86	20	10	51	24	0	1
65355	0	47	0	0	153	51	21.79	2	0	0	0	0	96	64	78	5.1	1.35	4.19	0	1.3	1.98	15	10	74	11	0	1
65391	1	28	0	0	167.5	67.5	24.06	2	0	0	0	0	111	75	71	4.4	1.13	4.52	0	1.31	2.61	19	19	44	14	0	1
62055	1	26	0	0	173	70.8	23.66	2	1	0	0	0	131	72	93	3.8	0.91	4.36	0	1.13	2.75	19	21	101	16	0	1
62057	1	27	0	0	175	79.7	26.02	3	0	0	1	0	127	68	84	4.6	1.02	3.76	0	1.02	1.83	12	8	72	16	0	1
62121	0	30	0	0	167	52.4	18.79	2	0	0	1	0	100	70	94	5	0.54	3.23	0	1.29	1.48	14	14	49	9	0	1
62130	1	23	0	0	176.5	72.7	23.34	2	0	0	0	0	127	80	81	4.7	1.62	4.99	0	1.2	2.82	17	18	46	17	0	1
62157	1	55	0	0	166.5	68.2	24.6	2	1	0	0	1	142	92	70	5.6	0.54	4.67	0	1.57	2.41	25	32	61	16	0	1
62164	0	43	0	0	157	55.6	22.56	2	0	0	0	0	110	80	81	4.7	1.36	7.92	1	1.82	5.26	28	33	82	59	0	1
66311	1	28	0	0	177	70.2	22.41	2	0	0	0	0	117	74	59	3.9	0.73	4.35	0	2.03	1.8	27	33	51	13	0	1
66313	1	28	0	0	175	63.8	20.83	2	1	0	0	0	137	79	79	4.2	1.47	3.65	0	1.08	1.75	22	26	81	18	0	1
66315	0	49	0	0	156	52	21.37	2	1	0	0	0	142	90	91	4.7	0.89	5.19	0	1.75	3.06	17	12	55	9	0	1
66362	0	35	0	0	158	47.2	18.91	2	0	0	0	0	100	70	78	4.5	0.66	5.22	0	1.58	2.95	17	6	51	9	0	1
66379	1	41	1	1	173	88.7	29.64	3	0	1	1	0	120	70	71	4.7	1.71	4.02	0	1.04	2.24	26	41	69	44	0	1
66381	0	44	0	0	159	62	24.52	2	0	1	1	0	116	70	75	4.6	2.59	4.95	0	1.18	2.7	17	16	37	13	0	1
66396	0	26	0	0	162.5	51.2	19.39	2	0	0	0	0	100	70	80	5.1	0.93	4.15	0	1.71	1.91	20	19	64	14	0	1
65468	0	63	0	0	168.5	69.5	24.48	2	1	0	0	1	130	86	96	5.6	1	4.9	0	1.56	2.57	17	12	80	12	0	1
64928	0	35	0	0	166	62.7	22.75	2	0	0	0	0	100	70	65	5.2	0.87	3.86	0	1.35	1.73	14	6	44	11	0	1
64982	1	50	1	2	166	76.1	27.62	3	0	1	1	1	122	74	76	8.3	13.12	6.1	1	0.94	1.36	33	55	138	59	0	1
64989	0	49	0	0	163	49.7	18.71	2	0	0	0	0	106	70	66	4.6	0.56	4.96	0	1.75	2.54	17	14	53	13	0	1
65007	1	49	0	0	174	70.8	23.38	2	0	0	0	0	117	69	63	4.4	1.17	4.41	0	1.46	2.23	22	24	69	32	0	1
65014	1	63	0	0	172	69.6	23.53	2	1	0	0	0	139	83	93	5	0.73	4.33	0	1.57	2.08	24	30	43	43	0	1
65082	0	37	0	0	159.5	52.4	20.6	2	0	0	0	0	100	70	90	4.4	1.28	4.76	0	1.68	2.35	20	14	36	9	0	1
58841	0	46	0	0	163	63.2	23.79	2	0	0	0	0	120	80	78	5.2	0.88	3.53	0	1.32	1.48	19	14	56	11	0	1
58860	1	40	1	2	158	78.9	31.61	4	1	0	1	0	128	86	98	5.4	1.18	3.15	0	0.89	1.62	23	43	73	61	0	1
58911	0	36	0	0	162	80	30.48	4	0	1	1	1	110	80	68	6.5	1.73	4.98	0	1.09	2.81	15	18	82	54	1	2
58924	1	26	0	0	171.5	75.5	25.67	3	0	0	0	0	124	75	82	4.6	0.93	3.45	0	1.35	1.41	23	41	61	24	0	1
59126	0	40	1	1	161	70	27.01	3	0	0	0	1	100	70	82	5.8	1.26	5.27	0	1.4	3.1	17	16	51	10	0	1
65381	0	45	0	0	167.5	56.8	20.25	2	0	0	0	1	120	80	72	6.3	1.02	4.02	0	1.48	1.95	16	14	51	12	0	1
65383	0	23	0	0	169.5	59.2	20.61	2	0	0	0	0	96	68	80	4.8	0.73	3.64	0	1.6	1.61	19	12	53	20	0	1
65390	1	27	0	0	163.5	53.8	20.13	2	0	0	0	0	125	71	96	5.1	0.8	4.24	0	1.56	2.07	20	16	53	18	0	1
65413	1	29	0	0	181.5	73.2	22.22	2	0	0	0	0	118	77	89	4.9	1.24	5.14	0	1.26	3.24	19	29	74	32	0	1
65483	0	49	0	0	166	63	22.86	2	0	0	0	1	100	66	71	6	0.8	4.46	0	1.94	2.01	17	17	58	32	0	1
65488	0	39	0	0	159	58.8	23.26	2	0	0	0	0	110	74	72	4.6	1.21	2.87	0	1.44	0.93	13	6	59	14	0	1
65211	1	59	1	1	168.5	73.2	25.78	3	0	0	1	1	119	80	67	6.5	1.42	4.15	0	1	2.35	24	23	67	31	1	2
65226	1	52	1	2	171	82.6	28.25	3	0	1	0	0	119	79	80	4.8	1.91	6.35	1	1.44	4.23	20	33	61	30	0	1
65292	1	44	1	2	170	73.6	25.47	3	1	1	0	1	128	86	85	5.9	3.13	6.01	1	1.38	3.68	32	66	49	58	1	2
65311	1	46	0	0	183.5	77.5	23.02	2	0	0	0	0	118	79	69	5.3	0.84	5.1	0	1.24	2.53	23	31	85	28	0	1
65345	0	54	1	1	153	53.9	23.03	2	0	1	0	0	110	80	81	4.7	2.09	4.65	0	1.3	2.35	24	21	96	43	1	2
65362	0	50	0	0	161	59	22.76	2	0	0	0	0	120	76	78	4.6	0.73	5.12	0	2.15	2.52	27	15	89	26	0	1
58740	1	41	0	0	173	73.7	24.62	2	0	0	0	0	118	70	82	5	0.55	4.31	0	1.42	2.1	21	29	55	12	0	1
58829	1	49	1	2	175	82	26.78	3	0	0	0	0	127	79	104	4.9	0.69	4.86	0	1.21	2.83	19	21	85	23	0	1
58940	0	64	1	1	147.5	66.2	30.43	4	1	1	0	0	142	96	56	5.1	2.35	5.6	0	1.46	2.83	17	19	105	19	0	1
58907	1	27	1	2	171	106	36.25	4	0	1	1	1	122	84	76	6.5	1.88	4.72	0	1.03	2.73	31	69	72	83	0	1
59132	0	50	0	0	152	56.8	24.58	2	0	0	0	0	100	70	71	4.8	0.88	5.66	0	1.62	3.26	26	36	67	15	0	1
60650	0	55	0	0	157.5	46.2	18.62	2	0	0	0	0	110	70	70	5.3	1.16	5.7	0	1.74	2.91	22	9	63	10	1	2
60843	1	40	1	1	180	75	23.15	2	0	1	0	0	114	68	61	5.2	2.45	5.65	0	1.15	3.38	16	15	56	25	0	1
66460	1	56	1	1	169	72.6	25.42	3	1	1	1	1	136	93	81	6.5	2.79	3.66	0	0.91	1.46	23	32	68	73	0	1
66485	1	45	0	0	169	65.8	23.04	2	0	0	0	0	113	74	69	4.5	1.54	3.92	0	1.12	2.29	26	24	92	18	0	1
66494	1	28	0	0	175	63.3	20.67	2	0	0	0	0	114	59	62	4.7	1	4.42	0	1.1	2.42	14	13	58	15	0	1
59017	1	45	0	0	175	89.2	29.13	3	1	0	0	1	148	88	88	8.5	1.55	6.39	1	1.35	4.33	28	73	60	122	0	1
59018	1	36	0	0	170	58.8	20.35	2	0	0	0	0	114	66	67	4.4	0.62	4.26	0	1.78	2.12	21	14	71	11	0	1
60889	0	45	0	0	164	68	25.28	3	0	1	0	0	110	74	98	5	2.47	4.91	0	1.37	2.78	20	23	71	20	0	1
60890	0	50	1	2	163	76.2	28.68	3	0	1	0	0	120	80	75	5.1	2.91	5.22	0	1.34	3.01	18	18	58	13	0	1
58833	1	58	1	1	163.5	68.5	25.62	3	0	1	1	1	128	76	85	6.1	2.68	5.18	0	0.94	3.15	28	43	54	36	0	1
58901	0	45	1	1	153	64.4	27.51	3	1	0	0	0	120	90	86	5.1	1.2	4.92	0	1.44	2.88	15	17	137	15	0	1
59020	1	47	0	0	178.5	61.7	19.36	2	0	0	0	1	100	68	87	5.6	1.35	4.42	0	1.3	2.51	16	11	70	16	0	1
59034	1	58	0	0	169	67.2	23.53	2	1	0	0	0	143	92	74	4.7	0.78	4.26	0	1.86	1.96	18	11	116	13	0	1
60873	0	46	0	0	161	54	20.83	2	0	0	0	0	100	70	74	5.2	0.67	5.08	0	1.73	2.42	22	20	34	16	0	1
66219	1	47	0	0	163.5	65.4	24.46	2	0	1	0	0	123	72	77	5.1	1.9	4.68	0	1.45	2.59	25	28	93	30	0	1
66223	1	54	1	1	173	75.6	25.26	3	0	0	0	0	129	74	71	4.5	1.13	4.11	0	1.1	2.06	18	19	76	17	0	1
66305	1	32	0	0	175.5	66.2	21.49	2	0	0	0	0	105	65	86	4.8	0.66	3.8	0	1.45	1.91	15	8	46	8	0	1
66306	1	40	1	1	168	68.6	24.31	2	0	1	0	0	121	82	70	4.7	2.95	4.71	0	1.38	2.55	17	18	76	23	0	1
66337	0	42	0	0	155.5	47.2	19.52	2	0	0	0	1	100	70	70	5.7	1.55	6.17	1	2.53	2.57	29	40	76	35	0	1
66437	1	26	0	0	169	68.2	23.88	2	0	0	1	0	111	67	87	4.9	1.64	4.13	0	1.04	2.09	17	18	72	15	0	1
65844	1	36	0	0	171	65	22.23	2	0	0	0	0	120	70	76	5.4	0.89	4.05	0	1.19	2	23	48	83	22	0	1
65846	1	25	1	2	174	80.2	26.49	3	0	0	0	0	109	71	88	4.8	1.08	5.33	0	1.1	3.22	39	131	89	64	0	1
65910	0	48	0	0	159	65	25.71	3	1	0	0	0	140	94	83	4.9	1.5	3.97	0	1.44	2.04	18	14	47	7	0	1
58701	1	50	0	0	173	80.6	26.93	3	0	1	0	1	113	80	71	5.7	1.95	5.55	0	1.16	3.13	25	33	78	20	0	1
58919	1	40	0	0	170.5	61	20.98	2	0	0	0	0	115	65	80	5.2	0.78	3.72	0	1.49	1.5	17	19	45	14	0	1
59033	1	44	1	1	172	73.2	24.74	2	0	0	0	0	118	78	62	4.1	1.27	4	0	1.15	2.02	36	77	90	85	0	1
59052	1	46	0	0	176.5	86.9	27.9	3	0	0	0	0	117	71	71	5.1	1.44	4.65	0	1.29	2.75	20	20	63	30	0	1
66137	0	52	0	0	168.5	67.9	23.91	2	1	1	0	0	140	96	68	5.2	3.17	6.73	1	1.55	3.94	18	21	66	26	0	1
66169	1	42	1	1	169.5	69.4	24.16	2	0	0	1	0	126	69	71	4.8	0.79	3.88	0	1.04	2.05	26	42	86	25	0	1
66187	1	40	0	0	164	58	21.56	2	0	1	0	0	122	69	81	4.2	2.02	4.31	0	1.08	2.44	20	22	85	22	0	1
66220	1	55	0	0	180	54.4	16.79	1	0	0	0	0	101	71	77	4.4	0.72	4.42	0	1.54	2.37	25	16	61	19	0	1
66256	0	41	0	0	147.5	51.8	23.81	2	0	0	0	0	104	70	71	4.1	0.63	4.45	0	1.43	2.53	20	10	54	10	0	1
66406	0	28	0	0	153.5	48.5	20.58	2	0	0	0	0	90	60	66	4.9	0.62	3.32	0	1.51	1.56	15	8	43	14	0	1
65098	0	53	0	0	152.5	47.9	20.6	2	0	0	0	0	100	70	71	4.2	1.07	4.94	0	1.64	2.58	21	15	62	12	0	1
65180	1	44	1	1	172	88	29.75	3	0	1	0	0	112	71	82	4.6	3.15	5.82	0	1.44	3.21	43	81	80	199	0	1
65187	1	44	1	1	173	83.2	27.8	3	0	1	0	0	126	80	85	3.9	4.42	4.24	0	1.14	2.05	29	38	53	62	0	1
65230	1	58	0	0	175	80	26.12	3	1	1	1	1	143	92	82	6.2	2.42	5.59	0	1.04	3.29	23	47	96	39	1	2
65298	1	43	1	1	166	71	25.77	3	0	1	0	0	110	79	69	5.3	1.7	5.89	0	1.27	3.82	30	61	85	94	0	1
65373	1	29	1	1	162.5	63.3	23.97	2	0	0	0	0	128	78	68	4.6	1.52	3.87	0	1.12	2.03	21	23	50	28	0	1
65380	1	54	1	2	173	81.3	27.16	3	1	1	0	0	134	90	74	5.4	2.93	5.88	0	1.38	3.69	29	29	48	26	0	1
62455	0	33	0	0	164.5	60.2	22.25	2	0	0	1	0	120	80	72	4.3	0.91	3.06	0	1.24	1.18	17	23	49	14	0	1
62530	1	43	0	0	171	77.4	26.47	3	0	0	0	0	122	81	85	4.7	0.9	5.43	0	1.28	3.16	23	44	68	36	0	1
66413	1	49	0	0	172	72.7	24.57	2	0	1	0	0	105	68	94	5.5	2.05	5.62	0	1.22	3.92	22	7	46	31	0	1
66430	0	30	0	0	169	51	17.86	1	0	0	0	0	104	70	79	5.2	0.6	5.44	0	2.05	2.77	19	8	55	9	0	1
66432	1	28	1	1	166.5	68.4	24.67	2	0	0	0	0	114	66	72	4.5	0.8	4.33	0	1.45	2.55	22	31	111	22	0	1
66481	1	22	0	0	176.5	59.8	19.2	2	0	0	0	0	115	68	69	4.4	0.78	4.16	0	1.63	1.72	24	31	69	12	0	1
66498	1	38	0	0	169	68.4	23.95	2	1	1	0	0	125	85	82	5.2	5.54	4.63	0	1.1	1.73	21	38	89	35	0	1
65405	0	45	0	0	158	54.3	21.75	2	1	0	0	0	150	94	89	4.9	1.01	4.11	0	1.39	2.15	12	6	102	17	0	1
65448	0	55	0	0	154	68.6	28.93	3	0	0	0	0	120	78	71	5.4	1.5	6.57	1	1.76	3.87	21	31	100	28	0	1
65498	1	41	0	0	171	65	22.23	2	0	0	0	0	120	83	83	5.1	1.5	4.59	0	1.63	2.13	30	39	52	109	0	1
65986	1	42	0	0	165	68	24.98	2	0	1	0	0	121	84	96	5.5	2.26	7.28	1	1.76	4.76	30	60	83	60	0	1
66054	0	50	0	0	158	55	22.03	2	0	0	0	0	120	80	76	4.8	1.02	4.96	0	1.87	2.62	28	25	54	19	0	1
66071	1	55	1	1	164	65.2	24.24	2	0	1	0	0	114	70	71	5	7.58	4.87	0	1.05	2.06	27	44	101	21	0	1
65089	0	52	0	0	171	70.5	24.11	2	0	0	0	0	120	80	86	4.6	1.21	3.53	0	1.45	1.35	31	15	46	23	0	1
65096	0	43	0	0	159.5	48.4	19.02	2	0	0	0	0	100	70	72	4.6	0.54	4.62	0	1.87	2.12	19	16	63	15	0	1
65121	1	27	0	0	171	71	24.28	2	0	0	0	0	111	76	100	4.8	1.03	3.01	0	1.12	1.41	16	14	66	15	0	1
65139	1	32	0	0	166	61.8	22.43	2	0	0	0	0	106	63	7	5	0.62	5.05	0	1.57	2.81	15	31	35	20	0	1
65171	1	47	0	0	167	72.6	26.03	3	0	1	0	1	117	84	71	8	2.25	5.29	0	1.4	3.06	25	28	51	36	0	1
65189	1	49	0	0	168.5	71	25.01	3	0	1	0	0	111	82	83	4.4	3.04	4.32	0	1.17	2.27	17	17	70	54	0	1
65196	1	49	1	2	168.5	77.5	27.3	3	1	0	0	0	152	105	98	5.4	1.67	5.83	0	1.42	3.48	21	30	55	23	0	1
[truncated: 30,923 more rows]

## Sheet: Variable classification
Variable classification
NAFLD	0 No 1 Yes
NAFLD severity	0 no NAFLD; 1 mild NAFLD; 2 moderate/severe NAFLD.
BMI	1	<18.5
	2	>=18.5	<25
	3	>=25	<30
	4	>=30
NST changes	0 No 1 Yes
